1 **The nucleoid occlusion protein SlmA is a direct transcriptional**  
2 **activator of chitobiose utilization in *Vibrio cholerae***

3

4 Catherine A. Klancher, Chelsea A. Hayes, and Ankur B. Dalia\*

5

6 Department of Biology, Indiana University, Bloomington, IN 47401

7 \*Author for correspondence: Ankur B. Dalia, [ankdalia@indiana.edu](mailto:ankdalia@indiana.edu)

8

9 Short Title: SlmA regulates chitobiose utilization in *V. cholerae*

1 **ABSTRACT**

2 Chitin utilization by the cholera pathogen *Vibrio cholerae* is required for its persistence and  
3 evolution via horizontal gene transfer in the marine environment. Genes involved in the  
4 uptake and catabolism of the chitin disaccharide chitobiose are encoded by the *chb* operon.  
5 The orphan sensor kinase ChiS is critical for regulation of this locus, however, the  
6 mechanisms downstream of ChiS activation that result in expression of the *chb* operon are  
7 poorly understood. Using an unbiased transposon mutant screen, we uncover that the  
8 nucleoid occlusion protein SlmA is a regulator of the *chb* operon. SlmA has not previously  
9 been implicated in gene regulation. Also, SlmA is a member of the TetR family of proteins,  
10 which are generally transcriptional repressors. *In vitro*, we find that SlmA binds directly to  
11 the *chb* operon promoter, and *in vivo*, we show that this interaction is, surprisingly,  
12 required for transcriptional activation of this locus and for chitobiose utilization. Using  
13 point mutations that disrupt distinct functions of SlmA, we find that DNA-binding, but not  
14 nucleoid occlusion, is critical for transcriptional activation. This study identifies a novel  
15 role for SlmA as a transcriptional regulator in *V. cholerae* in addition to its established role  
16 as a cell division licensing factor.

17

18 **AUTHOR SUMMARY**

19 The cholera pathogen *Vibrio cholerae* is a natural resident of the aquatic environment and  
20 causes disease when ingested in the form of contaminated food or drinking water. In the  
21 aquatic environment, the shells of marine zooplankton, which are primarily composed of  
22 chitin, serve as an important food source for this pathogen. The genes required for the  
23 utilization of chitin are tightly regulated in *V. cholerae*, however, the exact mechanism  
24 underlying this regulation is currently unclear. Here, we uncover that a protein involved in  
25 regulating cell division is also important for regulating the genes involved in chitin  
26 utilization. This is a newly identified property for this cell division protein and the  
27 significance of a common regulator for these two disparate activities remains to be  
28 understood.

29

30 **INTRODUCTION**

1 *V. cholerae*, the bacterium responsible for the diarrheal illness cholera, is naturally found in  
2 the marine environment. In this niche, this pathogen form biofilms on the shells of  
3 microscopic crustaceans. The shells of these organisms are primarily composed of chitin,  
4 an insoluble polymer of  $\beta$ -1,4 linked *N*-acetylglucosamine (GlcNAc). Chitin is the second  
5 most abundant biopolymer on the planet, and *Vibrio* species play an important role in  
6 recycling chitin in the aquatic environment [1]. The pathway for degradation and  
7 utilization of this carbon and nitrogen source is conserved among the *Vibrionaceae* [2].  
8

9 In addition to promoting the survival of *V. cholerae* in the aquatic environment, biofilm  
10 formation on chitin is also important for promoting transmission of this pathogen to its  
11 human host. Indeed, cholera outbreaks are seasonal in endemic areas and closely  
12 associated with blooms in chitinous zooplankton [1]. Furthermore, filtration of water  
13 through sari cloth in these areas (which has an effective pore size that will eliminate chitin  
14 biofilms but cannot filter planktonic bacteria) reduces the incidence of waterborne  
15 transmission [3, 4]. Chitin oligosaccharides also induce natural competence, a mechanism  
16 of horizontal gene transfer, in *V. cholerae* [5, 6]. Thus, *Vibrio*-chitin interactions are  
17 important for the persistence, transmission, and evolution of this important human  
18 pathogen in its environmental reservoir.  
19

20 The expression of genes required for chitin degradation, uptake, and utilization are  
21 regulated by the orphan sensor kinase ChiS [7, 8]. ChiS activity is normally repressed by  
22 chitin binding protein (CBP), the periplasmic substrate binding protein for the chitobiose  
23 ABC transporter [7]. This repression is relieved in the presence of chitin oligosaccharides,  
24 which bind to CBP. ChiS can also be activated, however, by deletion of CBP [7]. ChiS is an  
25 orphan sensor kinase and is not predicted to directly bind DNA. Without a cognate  
26 response regulator, the mechanism of gene regulation downstream of ChiS activation is  
27 poorly understood. One locus regulated by ChiS is the *chb* operon, which encodes the genes  
28 required for uptake and utilization of the chitin disaccharide chitobiose [8]. Here, we  
29 perform an unbiased screen to identify factors downstream of ChiS required for activation  
30 of the *chb* operon and characterize one newly identified transcriptional activator of this  
31 locus.

1

## 2 RESULTS

3 *An unbiased screen identifies SlmA as a putative activator of chitin utilization genes in V.*  
4 *cholerae*

5 To study ChiS regulation of the *chb* operon, we first generated a  $P_{chb}$  transcriptional  
6 reporter. As expected, this reporter was activated in a CBP mutant, and this activation was  
7 dependent on ChiS (**Fig. 1A**). We exploited this fact and used our transcriptional reporter  
8 to perform two independent transposon mutant screens to identify potential activators and  
9 repressors of this locus. To identify repressors, we used a  $P_{chb}$ -*lacZ* reporter (which forms  
10 white colonies), and screened for mutant blue colonies. Conversely, we screened for  
11 activators by using a  $P_{chb}$ -*lacZ*  $\Delta cbp$  strain (which forms blue colonies) and isolated mutant  
12 white colonies. A positive control for the repressor screen was *cbp*, while a positive control  
13 for the activator screen was *chiS*. As expected, both of these genes were identified in their  
14 respective screens, which helped to validate this approach. No additional hits were  
15 identified in the repressor screen, but one hit that we identified in the activator screen was  
16 VC0214, the gene encoding the nucleoid occlusion protein SlmA (**Fig. 1A**). Consistent with a  
17 role in transcriptional activation of this locus,  $P_{chb}$  is no longer induced in a  $\Delta slmA$   $\Delta cbp$   
18 mutant strain (**Fig. 1A and B**). To determine if SlmA is also required for activation of this  
19 locus under more physiologically relevant conditions, we assessed *cbp* transcript levels in  
20 WT and  $\Delta slmA$  cells when induced with (GlcNAc)<sub>6</sub>, the chitin hexasaccharide. While this  
21 locus is strongly induced in the WT, there is little to no activation in the *slmA* mutant, which  
22 is consistent with what we observed when using a *cbp* mutant to artificially activate this  
23 locus (**Fig. 1D**). Using 5' RACE, we mapped the transcription start sites (TSS) for the *chb*  
24 transcript and found that there are two distinct TSSs for this locus. One TSS representing a  
25 longer transcript that is basally expressed in the absence of chitin induction (uninduced  
26 transcript), and a second TSS for a shorter transcript that is expressed when this locus is  
27 induced by chitin oligosaccharides or artificially induced by deletion of CBP (induced  
28 transcript) (**Fig. S1**). Using primers that are specific to the longer uninduced transcript, we  
29 find that levels of this transcript are induced only 2 to 4-fold when cells are grown in the  
30 presence or absence of (GlcNAc)<sub>6</sub> in both WT and  $\Delta slmA$  cells, indicating that SlmA is  
31 specifically playing a role in the activation of this locus at the downstream TSS (**Fig. S1**).

1  
2 The *chb* operon encodes an ABC transporter that mediates uptake of chitobiose (permease  
3 encoded by VC0618-0619). *V. cholerae*, however, can also degrade chitobiose in the  
4 periplasm into the chitin monomer GlcNAc [2, 9, 10], which is taken up by a PTS  
5 transporter, VC0995, that is outside of the  $P_{chb}$  operon and whose regulation is independent  
6 of ChiS (**Fig. S2**) [8]. Thus, deletion of either transporter independently does not eliminate  
7 growth on chitobiose (**Fig. 1C**). However, upon deletion of both the chitobiose and GlcNAc  
8 transporters, cells are unable to grow on chitobiose as the sole carbon source (**Fig. 1C**). To  
9 determine if SlmA-dependent gene regulation of  $P_{chb}$  was physiologically relevant, we  
10 assessed whether SlmA was required for growth on chitobiose ((GlcNAc)<sub>2</sub>) as a sole carbon  
11 source. When we performed this analysis, we found that SlmA was required for growth on  
12 chitobiose in a  $\Delta VC0995$  mutant background, which is consistent with SlmA playing a  
13 physiologically important role in regulating the chitobiose transporter in the *chb* operon.  
14 As expected, all strains grew equally well when glucose or tryptone was provided as the  
15 sole carbon source whereas any strains with a  $\Delta VC0995$  mutation were unable to grow on  
16 GlcNAc (**Fig. S2**). A *slmA* mutant, however, does not phenocopy a *chiS* mutant. In fact, a  
17  $\Delta chiS$  strain is unable to grow on (GlcNAc)<sub>2</sub> as the sole carbon source, which is not  
18 surprising since this regulator is required for the expression of a number of chitin catabolic  
19 genes in addition to the *chb* operon [8](**Fig. S3**).

20  
21 SlmA function has primarily been characterized in *E. coli* [11-15]. This protein, however, is  
22 well conserved between *E. coli* and *V. cholerae* (67% identity, 83% similarity; **Fig. S4**). To  
23 determine if gene regulation by SlmA is a conserved property, we replaced the native copy  
24 of *slmA* in *V. cholerae* with the gene for *slmA* from *E. coli*. We found that *Ec* SlmA was able to  
25 activate transcription of  $P_{chb}$ , albeit, less robustly than *Vc* SlmA, suggesting that this activity  
26 is not unique to the *Vc* homolog, but is a conserved property of this protein (**Fig. 1E**).

27  
28 To further confirm that deletion of *slmA* was responsible for the phenotypes observed on  
29 the  $P_{chb}$  operon, we complemented *slmA* on a plasmid. As expected, we found that ectopic  
30 expression of SlmA was sufficient to recover activation of  $P_{chb}$  in a  $\Delta slmA \Delta cbp$  mutant (**Fig.**

1 **1F)**. As seen previously [16], expression from the pMMB vector used here is leaky and as a  
2 result, basal expression of SlmA from this plasmid without inducer is sufficient to activate  
3  $P_{chb}$  (**Fig. 1F**).

4  
5 *SlmA* is a direct transcriptional activator of  $P_{chb}$

6 SlmA is a TetR family protein and binds to a specific and well-defined sequence [12].  
7 Through bioinformatic analysis, we identified one SlmA binding site (SBS) in  $P_{chb}$  based on  
8 the SBS consensus sequence of *E. coli* SlmA (**Fig. 2A**) [12]. This was further confirmed by a  
9 recent *in vitro* whole genome binding analysis that identified putative SBSs in *V. cholerae*  
10 [17].

11  
12 To determine if SlmA could bind to this site, we performed electrophoretic mobility shift  
13 assays (EMSAs) using a probe from  $P_{chb}$  that contains the putative SBS. Indeed, we found  
14 that SlmA could directly bind to  $P_{chb}$  (**Fig. 2B**). SlmA was previously shown to bind to an  
15 SBS as a dimer-of-dimers [14], which is consistent with the two shifts we observed with the  
16  $P_{chb}$  promoter probe (**Fig. 2B**). As a negative control, we tested binding of SlmA to  $P_{nanH}$ , an  
17 unrelated promoter that lacks a predicted SBS. As expected, we found that SlmA could not  
18 bind to this probe (**Fig. 2B**). To determine if the putative SBS in  $P_{chb}$  is responsible for the  
19 shift observed in our EMSAs, we mutated 6 highly conserved residues in the SBS. We found  
20 that SlmA no longer shifted the  $P_{chb}$  probe when these residues were mutated, suggesting  
21 that this sequence represents a *bona fide* SBS in the *chb* promoter (**Fig. 2B**).

22  
23 Since we found that SlmA could directly bind to an SBS in the *chb* promoter, we next  
24 wanted to determine if this site is important for the transcriptional activation of this locus.  
25 To that end, we assessed activation of  $P_{chb}$  in a mutant strain where we mutated the SBS.  
26 When the SBS was mutated, we no longer observed activation of  $P_{chb}$  (**Fig. 2A**). Promoter  
27 truncations of  $P_{chb}$  also confirmed that the SBS in this promoter was required for activation  
28 of this locus (**Fig. S5**). Furthermore, we replaced the native SBS in the  $P_{chb}$  promoter with  
29 the consensus SBS for *E. coli* SlmA. This alternative SBS was able to support activation of  
30 the locus (**Fig. 2A**). Cumulatively, these results suggest that SlmA recruitment to the  $P_{chb}$   
31 promoter via an SBS is required for transcriptional activation. Our previous results

1 indicated that *Ec* SlmA supported activation of  $P_{chb}$  poorly compared to *Vc* SlmA (**Fig. 1E**).  
2 To determine if this was due to a reduced affinity of *Ec* SlmA for the SBS in  $P_{chb}$ , we tested  
3 activation of  $P_{chb}$  containing the consensus *Ec* SBS in a strain expressing *Ec* SlmA at the  
4 native locus. This strain, however, had similar levels of  $P_{chb}$  induction compared to a strain  
5 with *Ec* SlmA and the native SBS at  $P_{chb}$  (**Fig. S6**). Thus, reduced activation of *Ec* SlmA is  
6 likely due to a reduced ability to promote transcriptional activation and not due to reduced  
7 affinity for the SBS.

8  
9 Above, we showed that SlmA was required for regulation of the chitobiose ABC transporter  
10 encoded by the *chb* operon for optimal growth on chitobiose (**Fig. 1C**). Deletion of SlmA,  
11 however, may have pleiotropic effects. To determine if SlmA binding at the SBS in  $P_{chb}$  was  
12 responsible for this effect, we mutated the SBS in the native *chb* promoter and tested  
13 growth on chitobiose. We found that mutating the SBS in  $P_{chb}$  prevents growth on  
14 chitobiose in the  $\Delta VC0995$  background, which is consistent with this SBS being critical for  
15 regulating the chitobiose transporter in the *chb* operon (**Fig. 2C**). These results indicate  
16 that SlmA-dependent regulation of  $P_{chb}$  is both direct and physiologically relevant.

17  
18 *DNA binding, but not nucleoid occlusion activity, is required for SlmA-dependent*  
19 *transcriptional activation of  $P_{chb}$*

20 The ability of SlmA to mediate nucleoid occlusion is dependent upon its ability to dimerize,  
21 bind DNA, and interact with FtsZ. The residues involved in these interactions have been  
22 previously characterized [11-14]. So, we next wanted to dissect which functional  
23 interactions of SlmA are required for transcriptional activation of  $P_{chb}$ . To that end, we  
24 mutated residues in SlmA involved in DNA binding (T31, E43), FtsZ interaction (F63, R71),  
25 and dimerization (R173) (**Fig. 3A**). We then tested these mutants for their ability to  
26 activate expression of  $P_{chb}$ . We also assessed whether these SlmA variants could bind to  
27 DNA using a previously described synthetic SBS-*gfp* reporter where SlmA binding at a high  
28 affinity SBS represses expression of GFP [11]. We used the consensus SBS from *E. coli*  
29 instead of the native SBS found in  $P_{chb}$  because SlmA binds to this SBS with a higher affinity,  
30 allowing for a more sensitive evaluation of DNA binding (**Fig. S7**). We also tested the  
31 nucleoid occlusion activity of these SlmA variants by overexpressing each and assessing the

1 morphology of cells. Overexpression of WT SlmA results in a dramatic filamentous  
2 phenotype due to excess nucleoid occlusion activity, whereas alleles deficient in nucleoid  
3 occlusion do not cause this phenotype [15](**Fig. S5**). Also, we triple-FLAG tagged all SlmA  
4 alleles tested at the native locus to assess their expression levels by western blot analysis,  
5 which uncovered that all were expressed at least at WT levels (**Fig. S8**). Importantly, SlmA-  
6 triple FLAG constructs were still functional for  $P_{chb}$  activation (**Fig. S8**).

7  
8 First, we found that the FtsZ binding mutants (F63A and R71D) were still able to facilitate  
9 transcriptional activation of  $P_{chb}$ , although one mutant (R71D) displayed a reduced degree  
10 of activation (**Fig. 3B**). As expected, these SlmA variants were still able to bind DNA (**Fig.**  
11 **3C**) and had lost nucleoid occlusion activity (**Fig. S9**). These results suggest that the  
12 nucleoid occlusion activity of SlmA is not required for its ability to act as a transcriptional  
13 activator at the *chb* operon.

14  
15 Next, we tested DNA binding mutants T31A and E43A that were previously identified in *E.*  
16 *coli* [11], and, surprisingly, we found that these variants were still able to activate  
17 transcription of  $P_{chb}$ . The T31A mutant was still able to bind DNA as indicated by the  
18 synthetic SBS-GFP reporter (**Fig. 3C**). The E43A mutant, however, was not able to bind DNA  
19 in this assay (**Fig. 3C**). Our previous results with the mutated SBS would suggest that SlmA  
20 binding to  $P_{chb}$  is required for activation, therefore, we hypothesized that the E43A mutant  
21 may still have the ability to bind an SBS, however, this may be below the limit of detection  
22 of our DNA binding reporter. To test this, we purified SlmA E43A and assessed its ability to  
23 bind  $P_{chb}$  in an EMSA. Indeed, we found that SlmA E43A was still able to bind to this  
24 promoter, although with a greatly reduced affinity compared to WT SlmA or SlmA T31A  
25 (**Fig. 3D and 2B**). Thus, these results indicate that while these mutations may eliminate  
26 DNA binding of Ec SlmA [11], they may have a limited or reduced impact on DNA-binding of  
27 Vc SlmA. Overexpression of these DNA binding mutants indicated that they had lost the  
28 ability to mediate nucleoid occlusion (**Fig. S9**).

29  
30 Dimerization of SlmA is required for DNA binding as well as nucleoid occlusion [11].  
31 Dimerization requires a charge-based interaction of R173 from one monomer with E163 of



1 the other monomer. Swapping the charge of either residue can prevent dimerization [11],  
2 thus we used an R173E mutant to test the role of SlmA dimerization. The dimerization  
3 mutant R173E was unable to activate  $P_{chb}$ . As expected, this variant had also lost the ability  
4 to bind DNA (**Fig. 3C**) and mediate nucleoid occlusion (**Fig. S9**).

5  
6 Next, we sought to identify residues that are required for SlmA-mediated activation of  $P_{chb}$ .  
7 To that end, we performed error-prone PCR of SlmA and screened for colonies that had lost  
8 the ability to activate  $P_{chb-lacZ}$ . We then counter-screened colonies for the ability to bind  
9 DNA using our synthetic SBS-GFP reporter. We screened >15,000 colonies and identified  
10 ~500 colonies that were deficient for activation of  $P_{chb-lacZ}$ . In our counter-screen,  
11 however, we found that none of these SlmA mutants maintained the ability to bind DNA,  
12 suggesting that DNA binding and transcriptional activation of  $P_{chb}$  are tightly linked. One  
13 variant identified in this screen was SlmA E43K, which is the same residue previously  
14 identified as playing a role in DNA binding [14], however, with a lysine substitution in place  
15 of alanine. We hypothesized that the E43K mutant could no longer bind to DNA, in contrast  
16 to the E43A variant studied above. To test this, we purified SlmA E43K and assessed its  
17 ability to bind  $P_{chb}$  *in vitro*. Indeed, by EMSA we found that E43K could not bind  $P_{chb}$  (**Fig.**  
18 **3D**). Importantly, this mutation does not simply result in an unstable protein because the  
19 E43K mutant still makes WT levels of SlmA protein (**Fig. S8**). This mutant also lost the  
20 ability to mediate nucleoid occlusion when overexpressed (**Fig. S9**). Cumulatively, these  
21 results indicate that high affinity binding of SlmA to DNA may be required for proper  
22 nucleoid occlusion, while weak binding is sufficient to mediate transcriptional activation of  
23  $P_{chb}$ .

24  
25 *SlmA is not sufficient to promote activation of  $P_{chb}$*

26 Thus far, our data suggest that activation of  $P_{chb}$  requires activation of ChiS, either via  
27 deletion of *cbp* or induction with chitin oligosaccharides. To determine if SlmA is the sole  
28 activator that acts downstream of ChiS we decided to overexpress SlmA to see if it was  
29 sufficient to activate  $P_{chb}$  in the absence of either inducer. Overexpression of WT SlmA  
30 results in a dramatic filamentous phenotype (**Fig. S9**). Interestingly, overexpression of WT  
31 SlmA from a chromosomally integrated  $P_{tac}$ -SlmA construct still induced  $P_{chb}$  expression in

1 a  $\Delta cbp$ -dependent manner, even at levels that induced morphological defects (10  $\mu$ M),  
2 although activation was lost when cultures were induced with 100  $\mu$ M IPTG (**Fig. S10**).  
3 Above, we show that the nucleoid occlusion mutants T31A, F63A, and R71D are still able to  
4 activate  $P_{chb}$  (**Fig. 3B**), while their overexpression does not result in filamentation (**Fig. S9**).  
5 Indeed, overexpression of SlmA F63A from a chromosomally integrated  $P_{tac}$ -SlmA F63A  
6 construct still supported activation in a  $\Delta cbp$ -dependent manner, however, induction with  
7 100  $\mu$ M IPTG still prevented activation similar to what was observed with overexpression  
8 of WT SlmA (**Fig S10**). Also, this was independent of any obvious morphological defect,  
9 suggesting that overexpression of SlmA at this level prevents  $P_{chb}$  activation independent of  
10 its role in nucleoid occlusion (**Fig. S10**).

11  
12 Next, To determine if SlmA was sufficient to mediate  $P_{chb}$  activation, we overexpressed  
13 SlmA T31A, F63A, and R71D mutants with 10  $\mu$ M IPTG and assessed whether we could  
14 activate  $P_{chb}$  under non-inducing conditions (i.e. in a  $cbp^+$  strain grown in the absence of  
15 chitin oligosaccharides). Overexpression of these constructs, however, did not result in  
16 activation under non-inducing conditions (**Fig. S11**). Cumulatively, these results indicate  
17 that the repression of ChiS by CBP plays a dominant role over the activity of SlmA as a  
18 transcriptional activator of  $P_{chb}$ . This is consistent with a model whereby another, as yet  
19 unidentified, protein acts downstream of ChiS and is required for coactivation of this locus  
20 along with SlmA.

21  
22 Since overexpression of SlmA F63A with 100  $\mu$ M IPTG inhibited  $P_{chb}$  activation, we decided  
23 to test whether this phenotype was the result of excess SlmA protein, which titrated away a  
24 putative co-activator from the  $P_{chb}$  operon. To that end, we overexpressed ChiS, which  
25 might enhance the expression / activity of this putative downstream coactivator.  
26 Interestingly, ChiS overexpression at 10-1000  $\mu$ M also prevented  $P_{chb}$  activation, albeit, not  
27 to the degree of SlmA F63A overexpression (**Fig. S10**). ChiS overexpression, however, did  
28 not rescue the loss of  $P_{chb}$  activation when SlmA F63A was overexpressed (**Fig. S10**). The  
29 lack of increased  $P_{chb}$  expression over the native levels in the presence of higher levels of  
30 ChiS and/or SlmA indicate that neither protein is limiting and that native levels of these  
31 proteins are sufficient for maximal activation of  $P_{chb}$ .

1

2 *Sequence specificity between the SBS and induced promoter for  $P_{chb}$  activation suggests a*  
3 *possible coactivator-binding site*

4 The transcriptional regulator cAMP receptor protein (CRP) binds to a specific DNA  
5 sequence in the presence of cAMP, allowing for activation or repression of target genes.  
6 One turn of B DNA is approximately 10 bp, and moving the CRP binding site in  
7 denominations of 10 bp proximally or distally from the promoter maintains transcriptional  
8 activation of genes regulated by CRP by maintaining the helical phase of the CRP binding  
9 site in relation to the promoter [18, 19]. Conversely, moving the CRP binding site in  
10 increments of less than 10 bp places the CRP binding site out of helical phase with the  
11 promoter and therefore prevents activation by disrupting proper interaction with RNA  
12 polymerase (RNAP).

13

14 We tested whether there was helical phase-dependence for SlmA-mediated activation of  
15  $P_{chb}$  by a similar mechanism. We found that moving the SBS as little as 3 bp or as much as  
16 12 bp resulted in a significant decrease in  $P_{chb}$  activation (**Fig. S12**). Constructs in which the  
17 SBS was moved to maintain the helical phase (i.e. in increments of 10 bp) were also unable  
18 to promote robust activation, indicating that SlmA may not activate transcription by direct  
19 contact with RNA polymerase in a mechanism similar to CRP (**Fig. S12**). This is in line with  
20 the distance of the SBS from the TSS, 167 bp, which makes it unlikely that SlmA directly  
21 interacts with RNAP to activate transcription. This supports the hypothesis that a  
22 coactivator may bridge SlmA and RNAP to mediate activation of this locus.

23

24 Next, we assessed whether there was sequence specificity for activation of  $P_{chb}$  in the  
25 region between the SBS and promoter element for the chitin-induced TSS. We hypothesized  
26 that if a coactivator was required for expression, there may be sequence specificity within  
27 this region, while if no coactivator was required, maintaining the spacing between the SBS  
28 and TSS may be sufficient to support activation. We tested this by replacing the region  
29 between the SBS and the -35 signal with the same number of nucleotides from an  
30 intergenic region of the *lacZ* gene (**Fig. 4**). The activation of this reporter was abolished  
31 after swapping the native sequence with *lacZ* sequence (**Fig. 4**), indicating that sequence

1 specificity within this region may be required for activation. Furthermore, truncation  
2 studies indicated that elements necessary for activation include the SBS, TSS and  
3 intervening regions (**Fig. S5**). Also, a bioinformatically determined hairpin exhibits some  
4 inhibitory activity (**Fig. S5**). Together, these data are consistent with a model whereby the  
5 region between the SBS and TSS contains a coactivator-binding site required for  $P_{chb}$   
6 induction. There are, however, a number of alternative models that can account for the  
7 results obtained, which are addressed in the **Discussion** below.

8  
9 Finally, we were interested in determining which sigma factor was required for activation  
10 of  $P_{chb}$ . To test this, we inactivated every non-essential sigma factor (RpoN, RpoS, RpoE,  
11 RpoF, and RpoH) in *V. cholerae* and assessed transcriptional activation of  $P_{chb}$ . We observed  
12 activation in all mutant strains, suggesting that the essential housekeeping sigma factor  
13 RpoD likely plays a dominant role in  $P_{chb}$  expression (**Fig. S13**). The degree of  $P_{chb}$   
14 activation, however, was reduced in the *rpoE* mutant, suggesting that this sigma factor  
15 either plays a minor role in activation of this locus or that RpoE is required for proper  
16 expression or folding of the GFP reporter. Additionally, we observed an increase in  
17 expression in the *rpoS* mutant, suggesting that this sigma factor may play a role in the  
18 expression of some upstream repressor of this locus.

19

## 20 **DISCUSSION**

21 Here, we show that the cell division licensing factor SlmA is required for activation of  
22 chitobiose utilization genes in *V. cholerae*. We show that this regulation is direct because  
23 SlmA binds to  $P_{chb}$ , the promoter that regulates these genes. Furthermore, we demonstrate  
24 that this direct regulation is required for growth of *V. cholerae* on chitobiose.

25

26 While we show that SlmA is a direct activator of  $P_{chb}$ , the exact mechanism of activation is  
27 still unclear. We have shown that the location of the SBS within  $P_{chb}$  is important for  
28 activation. Additionally, we show that the sequence between the SBS and the -35 sequence  
29 is required for activation, consistent with this region harboring a coactivator binding site.  
30 Because the SBS is located 167 base pairs away from the TSS, it is unlikely that SlmA  
31 directly interacts with RNA Polymerase to mediate activation. We also explored the

1 possibility that SlmA binding may occlude a repressor binding site thereby allowing for  
2 activation of  $P_{chb}$  indirectly. We formally tested this hypothesis by performing a Tn mutant  
3 screen for repressors in a  $\Delta slmA \Delta cbp P_{chb-lacZ}$  reporter strain, however, this screen did not  
4 identify any putative repressors (~70,000 mutants visually screened). As a result, we  
5 propose a mechanism in which SlmA requires a presently unknown ChiS-dependent  
6 coactivator for activation of  $P_{chb}$  (**Fig. 5**). A candidate for this unknown factor was not  
7 identified in the Tn-mutant screen for activators that identified SlmA. This screen, however,  
8 may not have been saturating or, alternatively, this factor may be essential for viability or  
9 masked by genetic redundancy.

10  
11 Because ChiS is an orphan sensor kinase, the most logical coactivator would be a cognate  
12 response regulator. However, it has been shown that the conserved histidine and aspartate  
13 residues of ChiS that are critical for autophosphorylation and phosphorelay activity,  
14 respectively, are not important for activation of  $P_{chb}$  [20]. Thus, while the identity of the  
15 regulator that acts downstream of ChiS remains unknown, we believe it is unlikely to be a  
16 classical response regulator. It is possible that this coactivator bridges SlmA and RNA  
17 polymerase to mediate transcriptional activation (as depicted in **Fig. 5**). Alternatively, it is  
18 possible that the coactivator bends or structurally alters DNA in the *chb* promoter to  
19 enhance SlmA-dependent recruitment of RNA polymerase. Identifying and characterizing a  
20 putative coactivator for  $P_{chb}$  that acts downstream of ChiS will be the focus of future work.

21  
22 Another possible mechanism of activation is that SlmA directly interacts with RNA  
23 polymerase through its ability to polymerize and spread on DNA [14]. We have two results,  
24 however, that diminish this as a likely model for activation. First, we show that moving the  
25 SBS as little as 3 bp in either direction within  $P_{chb}$  abolishes activation (**Fig. S7**). If DNA  
26 spreading were critical we would predict that this perturbation should have a limited effect  
27 on transcriptional activation. Further, we have shown that overexpression of SlmA can  
28 actually decrease  $P_{chb}$  transcription, which again would not be predicted by a DNA  
29 spreading model (**Fig. S10**).

30

1 We have shown that there are two transcriptional start sites for the *chb* locus. The short  
2 transcript is strongly induced in the presence of chitin oligosaccharides, while the long  
3 transcript is basally produced in the absence of chitin and is only modestly induced in its  
4 presence (2-4 fold). This indicates that there may be an additional level of regulation  
5 involving the 5' untranslated region (UTR) of the *chb* transcript. A putative hairpin in  $P_{chb}$   
6 also seemed to have some inhibitor effect on  $P_{chb}$  expression (**Fig. S5**). It is possible that the  
7 long transcript and hairpin play an important role in the basal expression of the *chb*  
8 operon, which is required for a rapid response to chitin oligosaccharides.

9  
10 TetR proteins are generally transcriptional repressors, however, there are examples where  
11 these proteins can mediate transcriptional activation. One well-studied example is the  
12 LuxR protein in *Vibrio harveyi* (also known as HapR in *V. cholerae* and SmcR in *Vibrio*  
13 *vulnificus*) [21, 22]. SlmA is primarily characterized as a TetR family cell wall licensing  
14 factor and here we describe its additional role as a transcriptional activator. It has been  
15 hypothesized that transcriptional regulatory proteins arose from nucleoid-associated  
16 proteins [23]. Their role in binding DNA to properly structure the nucleoid may have  
17 evolved to aid in transcriptional regulation by contributing to the rearrangement of DNA  
18 structure at promoter regions [24]. One such example is integration host factor (IHF),  
19 which binds DNA and results in dramatic DNA bending (bend angle of  $\sim 120^\circ$ ), which can  
20 promote activation of regulated genes. SlmA binding results in subtle bending of DNA  
21 ( $\sim 18^\circ$ ) [14]. Thus, SlmA may have evolved from a protein that structures the nucleoid into  
22 a cell division licensing factor as well as a transcriptional regulator. Additionally, since  
23 SlmA carries out both nucleoid occlusion and transcriptional activation, it is possible that  
24 these two activities affect one another. As a result, co-option of SlmA for regulation of  $P_{chb}$   
25 may be a mechanism to integrate the cell division status of the cell with activation of chitin  
26 utilization.

27  
28 To our knowledge, this is the first example of gene regulation by a nucleoid occlusion  
29 protein. A recent *in vitro* whole genome binding analysis identified 79 putative SBSs in *V.*  
30 *cholerae* [17]. We determined that  $\sim 25\%$  (20/79) of these putative SBSs are in intergenic  
31 sites (including the one in  $P_{chb}$ ), while only  $\sim 12\%$  of the genome constitutes intergenic

1 sequence. By contrast, in *E. coli*, ~8.3% (2/24) of SBSs are in intergenic sites [12] and  
2 ~11% of the genome is intergenic. Also, analyzing binding sites for Noc, the nucleoid  
3 occlusion protein of *Bacillus subtilis*, ~12% (9/74) of binding sites are intergenic [25] and  
4 ~11% of the genome represents intergenic sequence. By contrast, for binding sites for the  
5 terminus macrodomain proteins MatP (known as *matS* sites) ~24% (6/25) are in  
6 intergenic regions [26]. Thus, it is possible that enriched binding of nucleoid-associated  
7 proteins at intergenic regions (as is the case for *matS* sites in *E. coli* and SBSs in *V. cholerae*)  
8 is because these sites are more flexible in regards to accommodating mutations compared  
9 to coding regions of the genome. Alternatively, SBSs may be enriched in intergenic sites in  
10 *V. cholerae* possibly to regulate the expression of additional genes. This will be the focus of  
11 future work. Preliminary RNA-seq analysis of a *slmA* mutant grown in rich medium,  
12 however, did not uncover any additional loci regulated by SlmA in *V. cholerae*. An effect of  
13 SlmA on gene regulation at  $P_{chb}$ , however, was only uncovered by deletion of CBP or growth  
14 on chitin (both of which induce this locus). Thus, it may be that additional inducing cues are  
15 required to uncover a role for SlmA-dependent regulation at additional genetic loci.  
16 Nucleoid occlusion factors are present across diverse bacterial genera and it is tempting to  
17 speculate that these proteins may also participate in regulating gene expression in addition  
18 to their established roles in cell division licensing.

19

## 20 **MATERIALS AND METHODS**

### 21 *Bacterial strains and culture conditions*

22 *V. cholerae* strains were routinely grown in LB medium and on LB agar supplemented when  
23 necessary with Carbenicillin (20 or 50  $\mu\text{g}/\text{mL}$ ), Kanamycin (50  $\mu\text{g}/\text{mL}$ ), Spectinomycin  
24 (200  $\mu\text{g}/\text{mL}$ ), Trimethoprim (10  $\mu\text{g}/\text{mL}$ ), and/or Chloramphenicol (2  $\mu\text{g}/\text{mL}$ ). For growth  
25 on a defined carbon source, strains were grown in M9 minimal medium containing the  
26 indicated carbon source.

27

### 28 *Transposon mutagenesis*

29 Transposon mutant libraries were generated with a Carb<sup>R</sup> mini-Tn10 transposon exactly as  
30 previously described [27]. Briefly, the transposon mutagenesis plasmid pDL1086 was first  
31 mated into the  $P_{chb}$ -*lacZ* or  $P_{chb}$ -*lacZ*  $\Delta cbp$  reporter strain. Transposition was induced by

1 plating cultures on Carb containing media at 42°C. To screen colonies, plates also contained  
2 40 µg/mL X-gal and 5 mM IPTG. IPTG was added to competitively inhibit the basal activity  
3 of the  $P_{chb-lacZ}$  reporter. This made it easier to distinguish colonies where the locus was  
4 uninduced (e.g.  $P_{chb-lacZ}$ ) from when the locus was induced (e.g.  $P_{chb-lacZ} \Delta cbp$ ).

#### 5 6 *Generation of mutant strains and constructs*

7 The parent strain used in this study was E7946 [28]. Mutant constructs were generated  
8 using splicing-by-overlap extension PCR exactly as previously described [29].  
9 Transformations and cotransformations were carried out exactly as previously described  
10 [30]. Mutant strains were confirmed by PCR and/or sequencing. The SlmA expression  
11 plasmid was generated by cloning the WT SlmA gene (VC0214) into the NdeI and BamHI  
12 sites of a His expression vector (pHis-tev). Untagged SlmA was also cloned into the EcoRI  
13 and BamHI sites of the IPTG-inducible expression vector pMMB67EH. Site directed mutants  
14 of SlmA were subsequently generated from these constructs using parallel single primer  
15 reactions exactly as previously described [31]. All plasmid inserts were confirmed by  
16 sequencing. Error prone PCR of SlmA was carried out exactly as previously described [32].  
17 A detailed description of mutant strains and primers used in this study are outlined in  
18 **Table S1** and **Table S2**, respectively.

#### 19 20 *Measuring GFP fluorescence*

21 GFP was measured exactly as previously described [33]. Briefly, strains were grown at 30°C  
22 overnight, washed, and resuspended in instant ocean medium to a final OD<sub>600</sub> of 1.0.  
23 Fluorescence was determined using a BioTek H1M plate reader with excitation set to 500  
24 nm and emission at 540 nm.

#### 25 26 *5' RACE*

27 The 5' end of transcripts were mapped using the SMARTer 5'/3' RACE kit according to  
28 manufacturer's instructions (Takara). The primers used are listed in **Table S2**.

#### 29 30 *Growth Curves*



1 Cells were grown in M9 minimal medium in the presence of 0.2% of the indicated carbon  
2 source at 37°C. Growth was kinetically monitored by measuring OD<sub>600</sub> on a BioTek H1M  
3 plate reader.

4

#### 5 *Quantitative reverse transcriptase PCR (qRT-PCR)*

6 RNA was isolated from cells using an RNEasy minikit according to manufacturer's  
7 instructions (Qiagen). RNA was reverse transcribed using AffinityScript QPCR cDNA  
8 Synthesis Kit (Agilent). Quantitative PCR was performed using iTaq Universal SYBR Green  
9 Supermix (Bio-Rad) with primers specific for the genes indicated (primers are listed in  
10 **Table S2**) and the reaction was monitored on a Step-One qPCR system.

11

#### 12 *Electrophoretic Mobility Shift Assays (EMSAs)*

13 EMSAs were performed essentially as previously described [29]. Briefly, probes were made  
14 by PCR. In the reaction we included Cy5-dCTP at a level that would result in incorporation  
15 of 1-2 Cy5 labeled nucleotides in the final probe. Binding reactions contained 20 mM Tris  
16 HCl pH 7.5, 100 mM KCl, 1 mM DTT, 5% glycerol, 0.1 mg/mL BSA, 0.1 mg/mL salmon  
17 sperm DNA, 2 nM Cy5 labeled DNA probe, and SImA at the indicated concentrations in a 20  
18 µL reaction volume. Reactions were incubated at room temperature for 30 minutes. Then,  
19 glycerol was added to a final concentration of 15% and 18 µL of each reaction was loaded  
20 onto a 5% polyacrylamide 0.5x TBE gel. The gel was run at 150V for 40 minutes in 0.5x  
21 TBE. Gels were imaged for Cy5 fluorescence on a Typhoon-9210 instrument or a BioRad  
22 ChemiDoc MP Imaging system.

23

#### 24 *Western blot analysis*

25 Cells were grown to mid-log in the presence of IPTG as an inducer where indicated. Cells  
26 were pelleted, resuspended and boiled in 1X SDS PAGE sample buffer and separated by  
27 polyacrylamide gel electrophoresis. Proteins were then transferred to PVDF and probed  
28 with rabbit polyclonal α-FLAG (Sigma) or mouse monoclonal α-RpoA (Biolegend) primary  
29 antibodies. Blots were then incubated with α-rabbit or α-mouse secondary antibodies  
30 conjugated to IRdye 800CW as appropriate and imaged using an Odyssey classic LI-COR  
31 imaging system.

1

2 *Microscopy*

3 Cells were grown to mid-log in LB medium and then mounted on 1% agarose pads. Cells  
4 were imaged using an Olympus IX83 phase contrast microscope.

5

6 **ACKNOWLEDGEMENTS**

7 We would like to thank Dean Rowe-Magnus and Julia van Kessel for sharing protocols and  
8 reagents and for helpful discussions. This work was supported by US National Institutes of  
9 Health Grant AI118863 to A.B.D. and startup funds from the Indiana University College of  
10 Arts and Sciences.

11

12 **REFERENCES**

- 13 1. Pruzzo C, Vezzulli L, Colwell RR. Global impact of *Vibrio cholerae* interactions with  
14 chitin. *Environ Microbiol.* 2008;10(6):1400-10. Epub 2008/03/04. doi: EMI1559 [pii]  
15 10.1111/j.1462-2920.2007.01559.x. PubMed PMID: 18312392.
- 16 2. Hunt DE, Gevers D, Vahora NM, Polz MF. Conservation of the chitin utilization  
17 pathway in the Vibrionaceae. *Appl Environ Microbiol.* 2008;74(1):44-51. Epub  
18 2007/10/16. doi: AEM.01412-07 [pii]  
19 10.1128/AEM.01412-07. PubMed PMID: 17933912; PubMed Central PMCID: PMC2223224.
- 20 3. Colwell RR, Huq A, Islam MS, Aziz KM, Yunus M, Khan NH, et al. Reduction of cholera  
21 in Bangladeshi villages by simple filtration. *Proc Natl Acad Sci U S A.* 2003;100(3):1051-5.  
22 Epub 2003/01/17. doi: 10.1073/pnas.0237386100  
23 0237386100 [pii]. PubMed PMID: 12529505; PubMed Central PMCID: PMC298724.
- 24 4. Huq A, Yunus M, Sohel SS, Bhuiya A, Emch M, Luby SP, et al. Simple sari cloth  
25 filtration of water is sustainable and continues to protect villagers from cholera in Matlab,  
26 Bangladesh. *MBio.* 2010;1(1). Epub 2010/08/07. doi: 10.1128/mBio.00034-10. PubMed  
27 PMID: 20689750; PubMed Central PMCID: PMC2912662.
- 28 5. Dalia AB, Lazinski DW, Camilli A. Identification of a membrane-bound  
29 transcriptional regulator that links chitin and natural competence in *Vibrio cholerae*. *MBio.*  
30 2014;5(1):e01028-13. doi: 10.1128/mBio.01028-13. PubMed PMID: 24473132; PubMed  
31 Central PMCID: PMC3903286.

- 1 6. Meibom KL, Blokesch M, Dolganov NA, Wu CY, Schoolnik GK. Chitin induces natural  
2 competence in *Vibrio cholerae*. *Science*. 2005;310(5755):1824-7. Epub 2005/12/17. doi:  
3 310/5755/1824 [pii]  
4 10.1126/science.1120096. PubMed PMID: 16357262.
- 5 7. Li X, Roseman S. The chitinolytic cascade in *Vibrios* is regulated by chitin  
6 oligosaccharides and a two-component chitin catabolic sensor/kinase. *Proc Natl Acad Sci U*  
7 *S A*. 2004;101(2):627-31. Epub 2003/12/31. doi: 10.1073/pnas.0307645100  
8 0307645100 [pii]. PubMed PMID: 14699052; PubMed Central PMCID: PMC327198.
- 9 8. Meibom KL, Li XB, Nielsen AT, Wu CY, Roseman S, Schoolnik GK. The *Vibrio cholerae*  
10 chitin utilization program. *Proc Natl Acad Sci U S A*. 2004;101(8):2524-9. Epub  
11 2004/02/26. doi: 10.1073/pnas.0307645100 [pii]. PubMed PMID: 14983042; PubMed Central PMCID:  
12 PMC356983.
- 13 9. Keyhani NO, Roseman S. The chitin catabolic cascade in the marine bacterium *Vibrio*  
14 *furnissii*. Molecular cloning, isolation, and characterization of a periplasmic beta-N-  
15 acetylglucosaminidase. *J Biol Chem*. 1996;271(52):33425-32. PubMed PMID: 8969205.
- 16 10. Keyhani NO, Roseman S. The chitin catabolic cascade in the marine bacterium *Vibrio*  
17 *furnissii*. Molecular cloning, isolation, and characterization of a periplasmic  
18 chitodextrinase. *J Biol Chem*. 1996;271(52):33414-24. PubMed PMID: 8969204.
- 19 11. Cho H, Bernhardt TG. Identification of the SlmA active site responsible for blocking  
20 bacterial cytokinetic ring assembly over the chromosome. *PLoS Genet*.  
21 2013;9(2):e1003304. doi: 10.1371/journal.pgen.1003304. PubMed PMID: 23459366;  
22 PubMed Central PMCID: PMC3573117.
- 23 12. Cho H, McManus HR, Dove SL, Bernhardt TG. Nucleoid occlusion factor SlmA is a  
24 DNA-activated FtsZ polymerization antagonist. *Proc Natl Acad Sci U S A*.  
25 2011;108(9):3773-8. doi: 10.1073/pnas.1018674108. PubMed PMID: 21321206; PubMed  
26 Central PMCID: PMC3048121.
- 27 13. Tonthat NK, Arold ST, Pickering BF, Van Dyke MW, Liang S, Lu Y, et al. Molecular  
28 mechanism by which the nucleoid occlusion factor, SlmA, keeps cytokinesis in check. *EMBO*  
29 *J*. 2011;30(1):154-64. doi: 10.1038/emboj.2010.288. PubMed PMID: 21113127; PubMed  
30 Central PMCID: PMC3020112.

- 1 14. Tonthat NK, Milam SL, Chinnam N, Whitfill T, Margolin W, Schumacher MA. SImA  
2 forms a higher-order structure on DNA that inhibits cytokinetic Z-ring formation over the  
3 nucleoid. *Proc Natl Acad Sci U S A*. 2013;110(26):10586-91. doi:  
4 10.1073/pnas.1221036110. PubMed PMID: 23754405; PubMed Central PMCID:  
5 PMCPMC3696773.
- 6 15. Bernhardt TG, de Boer PA. SImA, a nucleoid-associated, FtsZ binding protein  
7 required for blocking septal ring assembly over Chromosomes in *E. coli*. *Mol Cell*.  
8 2005;18(5):555-64. doi: 10.1016/j.molcel.2005.04.012. PubMed PMID: 15916962; PubMed  
9 Central PMCID: PMCPMC4428309.
- 10 16. Dalia AB, Seed KD, Calderwood SB, Camilli A. A globally distributed mobile genetic  
11 element inhibits natural transformation of *Vibrio cholerae*. *Proc Natl Acad Sci U S A*.  
12 2015;112(33):10485-90. doi: 10.1073/pnas.1509097112. PubMed PMID: 26240317;  
13 PubMed Central PMCID: PMC4547284.
- 14 17. Galli E, Poidevin M, Le Bars R, Desfontaines JM, Muresan L, Paly E, et al. Cell division  
15 licensing in the multi-chromosomal *Vibrio cholerae* bacterium. *Nat Microbiol*.  
16 2016;1(9):16094. doi: 10.1038/nmicrobiol.2016.94. PubMed PMID: 27562255.
- 17 18. Gaston K, Bell A, Kolb A, Buc H, Busby S. Stringent spacing requirements for  
18 transcription activation by CRP. *Cell*. 1990;62(4):733-43. PubMed PMID: 2167178.
- 19 19. Ushida C, Aiba H. Helical phase dependent action of CRP: effect of the distance  
20 between the CRP site and the -35 region on promoter activity. *Nucleic Acids Res*.  
21 1990;18(21):6325-30. PubMed PMID: 2173826; PubMed Central PMCID: PMCPMC332499.
- 22 20. Yamamoto S, Mitobe J, Ishikawa T, Wai SN, Ohnishi M, Watanabe H, et al. Regulation  
23 of natural competence by the orphan two-component system sensor kinase ChiS involves a  
24 non-canonical transmembrane regulator in *Vibrio cholerae*. *Mol Microbiol*.  
25 2014;91(2):326-47. doi: 10.1111/mmi.12462. PubMed PMID: 24236404.
- 26 21. van Kessel JC, Rutherford ST, Shao Y, Utria AF, Bassler BL. Individual and combined  
27 roles of the master regulators AphA and LuxR in control of the *Vibrio harveyi* quorum-  
28 sensing regulon. *J Bacteriol*. 2013;195(3):436-43. doi: 10.1128/JB.01998-12. PubMed  
29 PMID: 23204455; PubMed Central PMCID: PMCPMC3554009.
- 30 22. Waters CM, Bassler BL. The *Vibrio harveyi* quorum-sensing system uses shared  
31 regulatory components to discriminate between multiple autoinducers. *Genes Dev*.

- 1 2006;20(19):2754-67. doi: 10.1101/gad.1466506. PubMed PMID: 17015436; PubMed  
2 Central PMCID: PMCPMC1578700.
- 3 23. Visweswariah SS, Busby SJ. Evolution of bacterial transcription factors: how  
4 proteins take on new tasks, but do not always stop doing the old ones. *Trends Microbiol.*  
5 2015;23(8):463-7. doi: 10.1016/j.tim.2015.04.009. PubMed PMID: 26003748.
- 6 24. Dillon SC, Dorman CJ. Bacterial nucleoid-associated proteins, nucleoid structure and  
7 gene expression. *Nat Rev Microbiol.* 2010;8(3):185-95. doi: 10.1038/nrmicro2261.  
8 PubMed PMID: 20140026.
- 9 25. Wu LJ, Ishikawa S, Kawai Y, Oshima T, Ogasawara N, Errington J. Noc protein binds  
10 to specific DNA sequences to coordinate cell division with chromosome segregation. *EMBO*  
11 *J.* 2009;28(13):1940-52. doi: 10.1038/emboj.2009.144. PubMed PMID: 19494834; PubMed  
12 Central PMCID: PMCPMC2711181.
- 13 26. Mercier R, Petit MA, Schbath S, Robin S, El Karoui M, Boccard F, et al. The MatP/matS  
14 site-specific system organizes the terminus region of the *E. coli* chromosome into a  
15 macrodomain. *Cell.* 2008;135(3):475-85. doi: 10.1016/j.cell.2008.08.031. PubMed PMID:  
16 18984159.
- 17 27. McDonough E, Kamp H, Camilli A. *Vibrio cholerae* phosphatases required for the  
18 utilization of nucleotides and extracellular DNA as phosphate sources. *Mol Microbiol.*  
19 2016;99(3):453-69. doi: 10.1111/mmi.13128. PubMed PMID: 26175126; PubMed Central  
20 PMCID: PMC4714964.
- 21 28. Miller VL, DiRita VJ, Mekalanos JJ. Identification of *toxS*, a regulatory gene whose  
22 product enhances *toxR*-mediated activation of the cholera toxin promoter. *J Bacteriol.*  
23 1989;171(3):1288-93. PubMed PMID: 2646275; PubMed Central PMCID: PMC209743.
- 24 29. Dalia AB, Lazinski DW, Camilli A. Characterization of undermethylated sites in  
25 *Vibrio cholerae*. *J Bacteriol.* 2013;195(10):2389-99. doi: 10.1128/JB.02112-12. PubMed  
26 PMID: 23504020; PubMed Central PMCID: PMC3650525.
- 27 30. Dalia AB, McDonough E, Camilli A. Multiplex genome editing by natural  
28 transformation. *Proc Natl Acad Sci U S A.* 2014;111(24):8937-42. doi:  
29 10.1073/pnas.1406478111. PubMed PMID: 24889608; PubMed Central PMCID:  
30 PMC4066482.

- 1 31. Edelheit O, Hanukoglu A, Hanukoglu I. Simple and efficient site-directed  
2 mutagenesis using two single-primer reactions in parallel to generate mutants for protein  
3 structure-function studies. BMC Biotechnol. 2009;9:61. doi: 10.1186/1472-6750-9-61.  
4 PubMed PMID: 19566935; PubMed Central PMCID: PMC2711942.
- 5 32. Cadwell RC, Joyce GF. Randomization of genes by PCR mutagenesis. PCR Methods  
6 Appl. 1992;2(1):28-33. PubMed PMID: 1490172.
- 7 33. Dalia AB. RpoS is required for natural transformation of *Vibrio cholerae* through  
8 regulation of chitinases. Environ Microbiol. 2016;18(11):3758-67. doi: 10.1111/1462-  
9 2920.13302. PubMed PMID: 26999629.

10

## 11 **FIGURE LEGENDS**

12 **Figure 1** - *SlmA* is required for transcriptional activation of  $P_{chb}$ . **(A)** GFP fluorescence was  
13 measured in the indicated strains, all of which contain a  $P_{chb}$ -*gfp* transcriptional reporter.  
14 Statistics shown indicate that samples are significantly different from the “ $\Delta cbp$ ” sample.  
15 **(B)** Transcription of  $P_{chb}$  was schematized on X-gal-containing media in the indicated  
16 strains, all of which contained a  $P_{chb}$ -*lacZ* transcriptional reporter. **(C)** Growth curves of the  
17 indicated strains in M9 minimal medium containing 0.5% chitobiose as a sole carbon  
18 source. **(D)** qRT-PCR of the *chb* short transcript was measured in WT and  $\Delta slmA$  cells  
19 grown in the presence or absence of (GlcNAc)<sub>6</sub>. **(E)** GFP fluorescence was measured in the  
20 indicated strains, all of which contain a  $P_{chb}$ -*gfp* transcriptional reporter. **(F)** GFP  
21 fluorescence was measured in a  $P_{chb}$ -*gfp*  $\Delta slmA$   $\Delta cbp$  strain harboring either an empty  
22 vector (pMMB) or a *SlmA* expression vector (pMMB-*SlmA*) grown in the presence or  
23 absence of 5  $\mu$ M IPTG. Data in **A**, **D**, **E**, and **F** are shown as the mean  $\pm$  SD and are from at  
24 least three independent biological replicates. Data from **B** and **C** are representative of at  
25 least 2 independent experiments. \*\*\* =  $p < 0.001$ , NS = not significant.

26

27 **Figure 2** - *SlmA* is a direct transcriptional activator of  $P_{chb}$ . **(A)** Promoter map of  $P_{chb}$   
28 showing the SBS and the TSSs mapped in the presence (induced) and absence (uninduced)  
29 of chitin. “WT SBS” represents the native  $P_{chb}$  sequence, “*E. coli* SBS” indicates that the  
30 native SBS was swapped for the consensus SBS from *E. coli*, and “mutated SBS” indicates  
31 that the 6 highly conserved residues in the SBS were mutated. SBS sequences for the

1 indicated mutants are shown in bold text and the 6 most highly conserved residues of the  
2 SBS are underlined. GFP fluorescence was measured in strains harboring the indicated  
3 mutations in the  $P_{chb-gfp}$  transcriptional reporter. The  $cbp$  status of each strain is indicated  
4 by a “+” ( $cbp$  intact) or a “ $\Delta$ ” ( $\Delta cbp$  strain background). Data are shown as the mean  $\pm$  SD  
5 and are from at least three independent biological replicates. **(B)** EMSAs performed with  
6 purified SlmA and the indicated promoter probes. The two  $P_{chb}$  probes were incubated with  
7 (from left to right) 0 nM, 7.5 nM, 15 nM, 30 nM, 60 nM, 120 nM, 240 nM, or 480 nM SlmA.  
8 The  $P_{nanH}$  probe was incubated with 0 nM or 480 nM SlmA. **(C)** Growth curves of the  
9 indicated strains in M9 minimal medium containing 0.5% chitobiose as the sole carbon  
10 source. Data from **B** and **C** are representative of at least 2 independent experiments. \*\*\* =  
11  $p < 0.001$ , \* =  $p < 0.05$ , NS = not significant.

12  
13 **Figure 3 - DNA binding, but not nucleoid occlusion activity, is required for SlmA-dependent**  
14 **transcriptional activation of  $P_{chb}$ .** **(A)** Schematic of SlmA depicting residues mutated in this  
15 study. T31 and E43 are predicted to interact with DNA, F63 and R71 mediate FtsZ  
16 interactions, and R173 is required for dimerization. **(B)** GFP fluorescence was measured in  
17 strains containing a  $P_{chb-gfp}$  reporter and the indicated site-directed mutations in the  
18 native copy of  $slmA$ . Statistical comparisons are made to the “WT  $\Delta cbp$ ” sample. **(C)** GFP  
19 fluorescence was assessed in strains harboring an  $SBS-gfp$  reporter that is a readout for  
20 DNA binding and contain the indicated site-directed mutations in the native copy of  $slmA$ .  
21 Statistical comparisons are made to the “ $\Delta slmA$ ” sample. **(D)** EMSAs performed with the  
22 WT  $P_{chb}$  probe or the negative control  $P_{nanH}$  probe incubated with (from left to right): 0 nM,  
23 240 nM, 480 nM, 960 nM, or 1920 nM of the indicated SlmA mutant protein. Data in **B** and **C**  
24 are shown as the mean  $\pm$  SD and are from at least three independent biological replicates.  
25 Data from **D** is representative of at least two independent experiments. \*\*\* =  $p < 0.001$ , NS =  
26 not significant.

27  
28 **Figure 4 – Sequence specificity between the SBS and induced promoter for  $P_{chb}$  activation.** A  
29 112 bp fragment of  $P_{chb-gfp}$  (from -162 to -50 bp) was swapped out with a fragment of  
30 equal size from the  $lacZ$  gene and activation was determined by assessing fluorescence. All

1 data are shown as the mean  $\pm$  SD and are from at least three independent biological  
2 replicates.

3

4 **Figure 5 - Model for transcriptional activation of  $P_{chb}$ .** (A) In the absence of chitin, CBP  
5 inhibits ChiS from activating expression of  $P_{chb}$ . (B) In the presence of chitin, CBP binds  
6 chitin oligomers, which relieves repression of ChiS. We hypothesize that ChiS interacts with  
7 or activates another currently unidentified protein, which recruits RNA Polymerase to  
8 activate transcription of  $P_{chb}$  in a SlmA-dependent manner. SlmA may help to recruit the  
9 putative factor to the  $P_{chb}$  promoter or is an otherwise required coactivator of this locus.  
10 Upon expression of the *chb* operon, proteins involved in chitin uptake and utilization of  
11 chitobiose, including CBP and the chitobiose ABC permease, are synthesized.



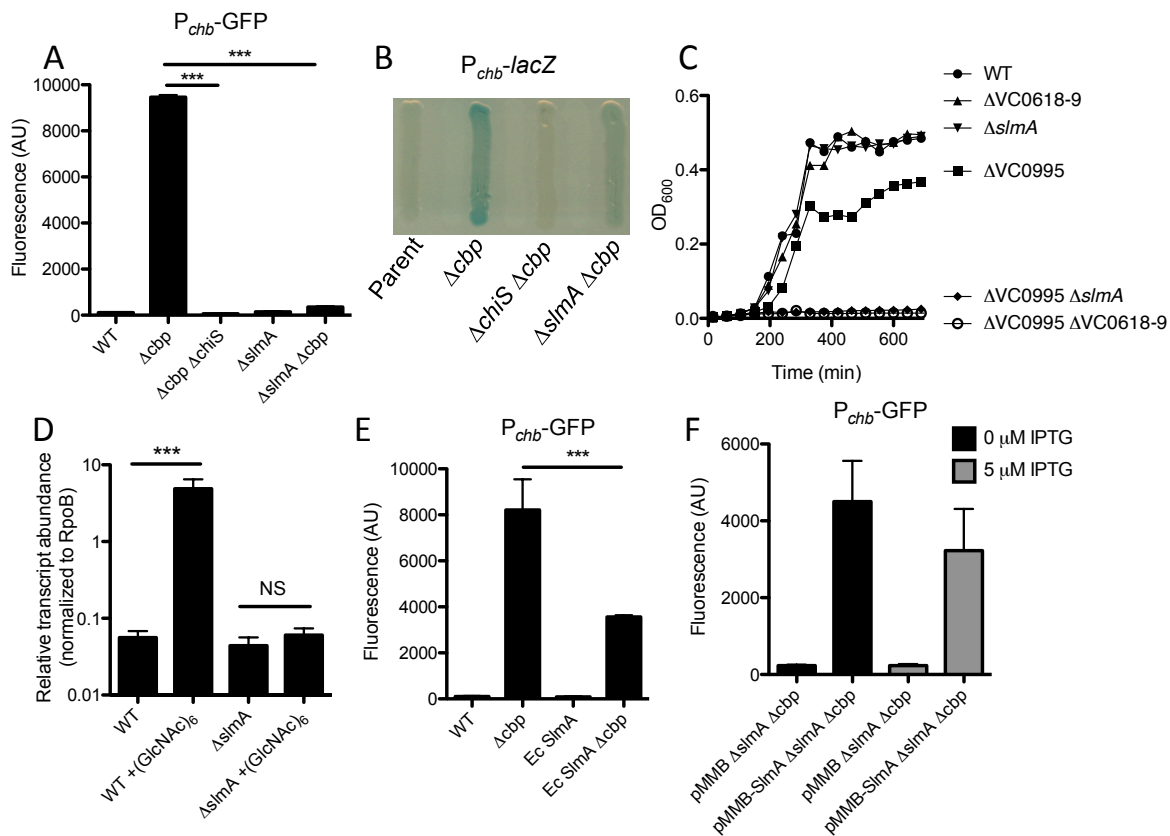

**Figure 1** - *SlmA* is required for transcriptional activation of  $P_{chb}$ . **(A)** GFP fluorescence was measured in the indicated strains, all of which contain a  $P_{chb}$ -*gfp* transcriptional reporter. Statistics shown indicate that samples are significantly different from the " $\Delta cbp$ " sample. **(B)** Transcription of  $P_{chb}$  was schematized on X-gal-containing media in the indicated strains, all of which contained a  $P_{chb}$ -*lacZ* transcriptional reporter. **(C)** Growth curves of the indicated strains in M9 minimal medium containing 0.5% chitobiose as a sole carbon source. **(D)** qRT-PCR of the *chb* short transcript was measured in WT and  $\Delta slmA$  cells grown in the presence or absence of  $(GlcNAc)_6$ . **(E)** GFP fluorescence was measured in the indicated strains, all of which contain a  $P_{chb}$ -*gfp* transcriptional reporter. **(F)** GFP fluorescence was measured in a  $P_{chb}$ -*gfp*  $\Delta slmA \Delta cbp$  strain harboring either an empty vector (pMMB) or a *SImA* expression vector (pMMB-*SImA*) grown in the presence or absence of 5  $\mu M$  IPTG. Data in **A**, **D**, **E**, and **F** are shown as the mean  $\pm$  SD and are from at least three independent biological replicates. Data from **B** and **C** are representative of at least 2 independent experiments. \*\*\* =  $p < 0.001$ , NS = not significant.

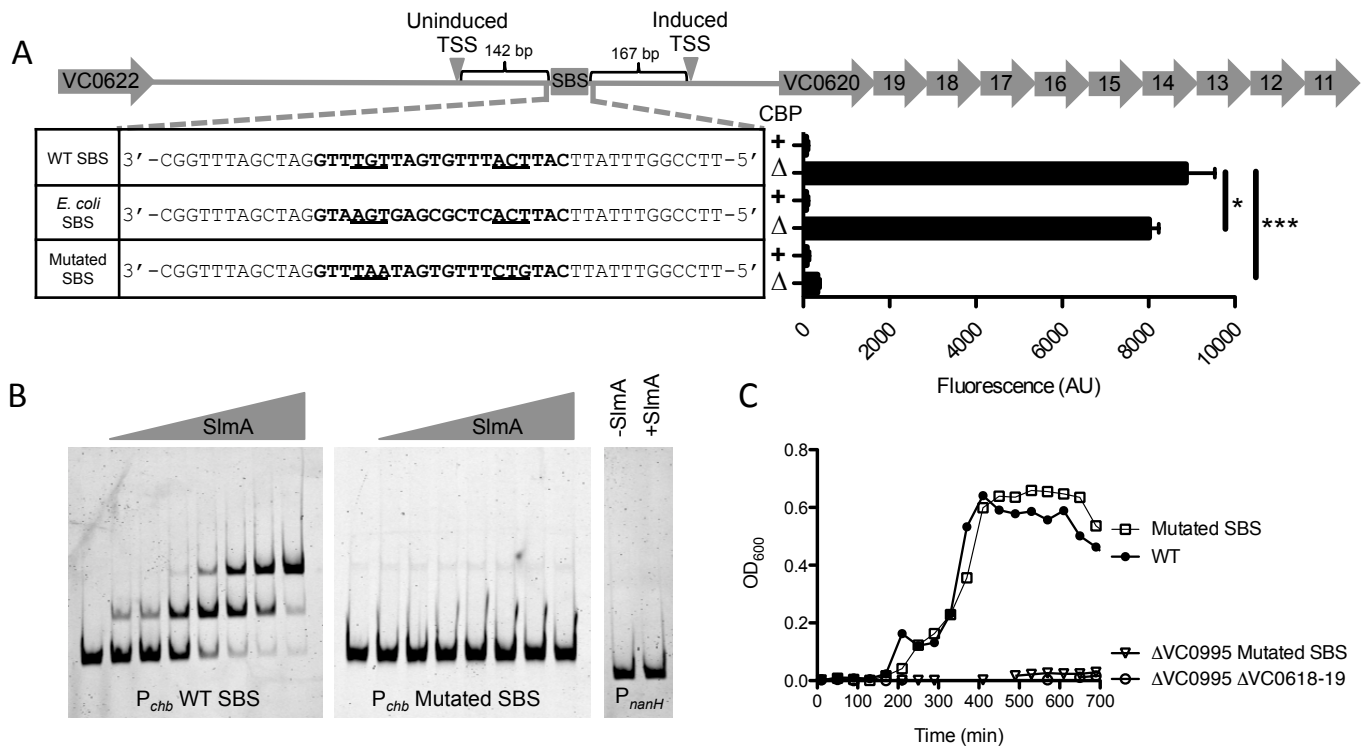

**Figure 2 - *SlmA* is a direct transcriptional activator of  $P_{chb}$ .** (A) Promoter map of  $P_{chb}$  showing the SBS and the TSSs mapped in the presence (induced) and absence (uninduced) of chitin. “WT SBS” represents the native  $P_{chb}$  sequence, “*E. coli* SBS” indicates that the native SBS was swapped for the consensus SBS from *E. coli*, and “mutated SBS” indicates that the 6 highly conserved residues in the SBS were mutated. SBS sequences for the indicated mutants are shown in bold text and the 6 most highly conserved residues of the SBS are underlined. GFP fluorescence was measured in strains harboring the indicated mutations in the  $P_{chb}$ -*gfp* transcriptional reporter. The *cbp* status of each strain is indicated by a “+” (*cbp* intact) or a “Δ” ( $\Delta$ *cbp* strain background). Data are shown as the mean  $\pm$  SD and are from at least three independent biological replicates. (B) EMSAs performed with purified *SlmA* and the indicated promoter probes. The two  $P_{chb}$  probes were incubated with (from left to right) 0 nM, 7.5 nM, 15 nM, 30 nM, 60 nM, 120 nM, 240 nM, or 480 nM *SlmA*. The  $P_{nanH}$  probe was incubated with 0 nM or 480 nM *SlmA*. (C) Growth curves of the indicated strains in M9 minimal medium containing 0.5% chitobiose as the sole carbon source. Data from B and C are representative of at least 2 independent experiments. \*\*\* =  $p < 0.001$ , \* =  $p < 0.05$ , NS = not significant.

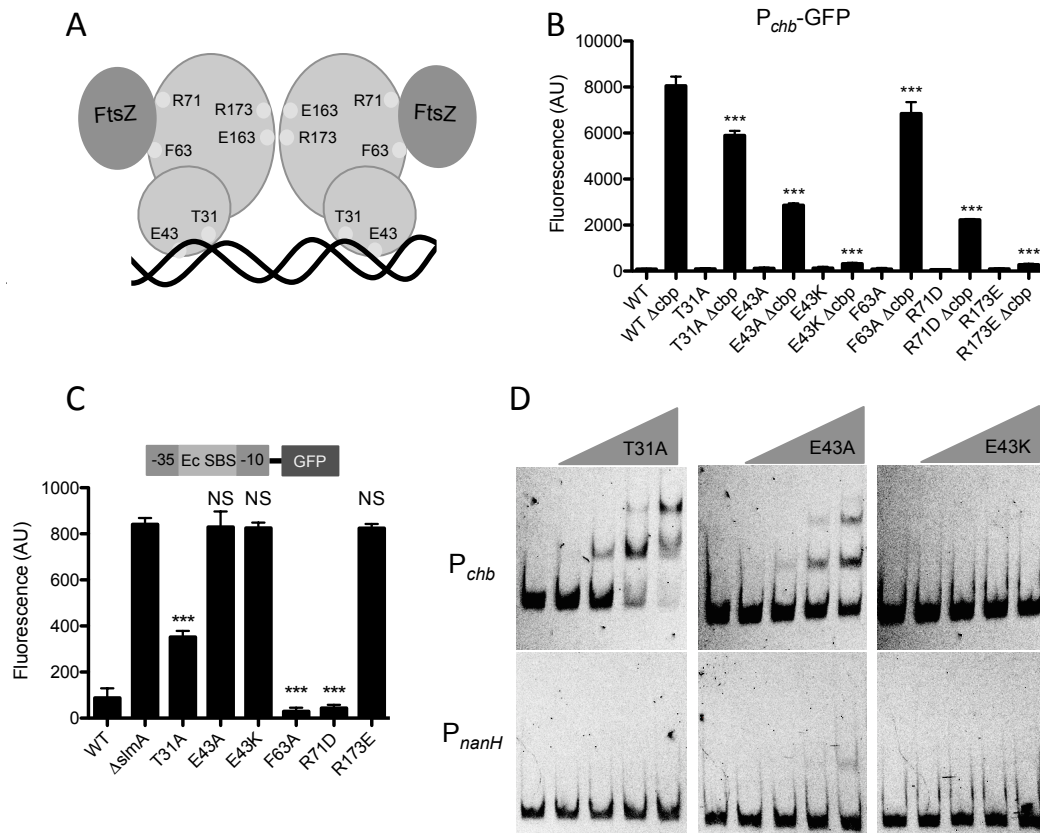

**Figure 3 - DNA binding, but not nucleoid occlusion activity, is required for *SlmA*-dependent transcriptional activation of  $P_{chb}$ .** (A) Schematic of *SlmA* depicting residues mutated in this study. T31 and E43 are predicted to interact with DNA, F63 and R71 mediate *FtsZ* interactions, and R173 is required for dimerization. (B) GFP fluorescence was measured in strains containing a  $P_{chb}$ -*gfp* reporter and the indicated site-directed mutations in the native copy of *slmA*. Statistical comparisons are made to the “WT  $\Delta cbp$ ” sample. (C) GFP fluorescence was assessed in strains harboring an SBS-*gfp* reporter that is a readout for DNA binding and contain the indicated site-directed mutations in the native copy of *slmA*. Statistical comparisons are made to the “ $\Delta slmA$ ” sample. (D) EMSAs performed with the WT  $P_{chb}$  probe or the negative control  $P_{nanH}$  probe incubated with (from left to right): 0 nM, 240 nM, 480 nM, 960 nM, or 1920 nM of the indicated *SlmA* mutant protein. Data in B and C are shown as the mean  $\pm$  SD and are from at least three independent biological replicates. Data from D is representative of at least two independent experiments. \*\*\* =  $p < 0.001$ , NS = not significant.

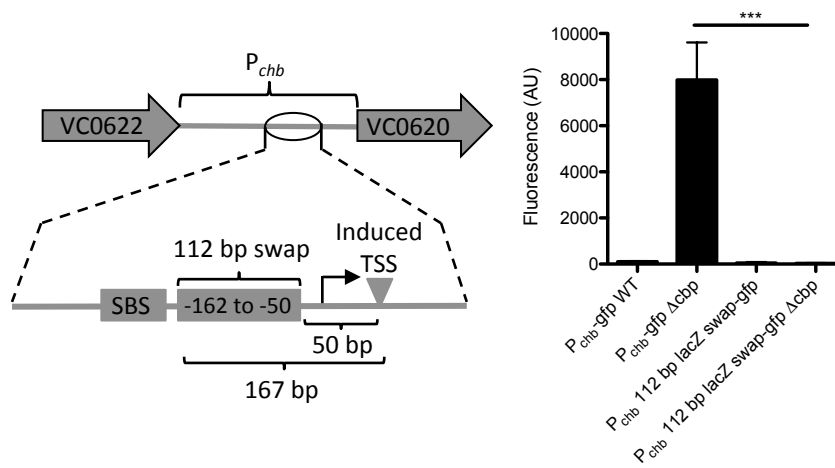

**Figure 4** – Sequence specificity between the SBS and induced promoter for  $P_{chb}$  activation. A 112 bp fragment of  $P_{chb}$ -gfp (from -162 to -50 bp) was swapped out with a fragment of equal size from the *lacZ* gene and activation was determined by assessing fluorescence. All data are shown as the mean  $\pm$  SD and are from at least three independent biological replicates.

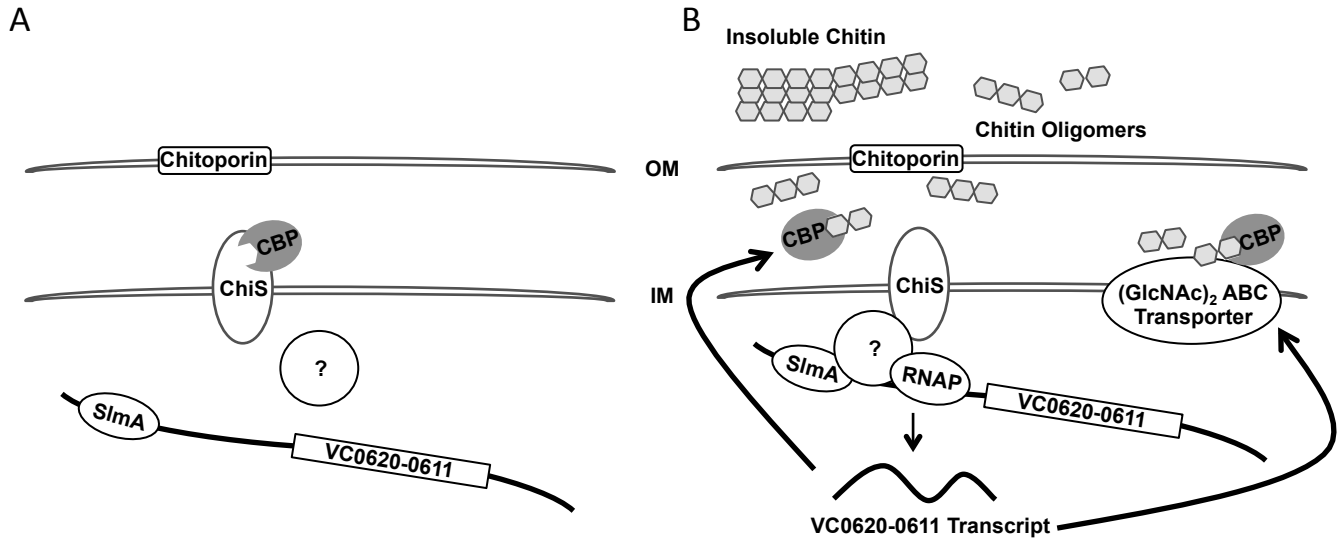

**Figure 5 - Model for transcriptional activation of  $P_{chb}$ .** (A) In the absence of chitin, CBP inhibits ChiS from activating expression of  $P_{chb}$ . (B) In the presence of chitin, CBP binds chitin oligomers which relieves repression of ChiS. We hypothesize that ChiS interacts with or activates another currently unidentified protein, which recruits RNA Polymerase to activate transcription of  $P_{chb}$  in a SlmA-dependent manner. SlmA may help to recruit the putative factor to the  $P_{chb}$  promoter or is an otherwise required coactivator of this locus. Upon expression of the *chb* operon, proteins involved in chitin uptake and utilization of chitobiose, including CBP and the chitobiose ABC permease, are synthesized.

## **Supplementary information for:**

The nucleoid occlusion protein SlmA is a direct transcriptional activator of chitobiose utilization in *Vibrio cholerae*

Catherine A. Klancher, Chelsea A. Hayes, and Ankur B. Dalia\*

**Fig. S1** - Levels of the long “uninduced”  $P_{chb}$  transcript do not change upon induction with  $(GlcNAc)_6$ .

**Fig. S2** – Mutant strains grow as expected on glucose, GlcNAc, and tryptone.

**Fig. S3** – *ChiS* is required for growth on chitobiose.

**Fig. S4** – Sequence alignment of *SlmA* protein from *V. cholerae* and *E. coli*.

**Fig. S5** - Truncations narrow the region of  $P_{chb}$  required for transcriptional activation.

**Fig. S6** – An *Ec* SBS at  $P_{chb}$  does not enhance activation of  $P_{chb}$  by *Ec SlmA*.

**Fig. S7** - *SlmA* has a higher affinity for a synthetic SBS that represents the consensus sequence for *SlmA* binding in *E. coli* compared to the SBS present in  $P_{chb}$ .

**Fig. S8** – Expression of *SlmA* mutant alleles is similar *in vivo*.

**Fig. S9** - Mutations in *SlmA* that reduce DNA binding or *FtsZ* interaction diminish nucleoid occlusion activity.

**Fig. S10** - Overexpression of *SlmA* and *ChiS* inhibits  $P_{chb}$  activation.

**Fig. S11** - Overexpression of *SlmA* is not sufficient to activate expression of  $P_{chb}$ .

**Fig. S12** - The placement of the SBS in  $P_{chb}$  is critical for transcriptional activation.

**Fig. S13** – Role of nonessential sigma factors in transcriptional activation of  $P_{chb}$ .

**Table S1** – Strains used in this study

**Table S2** – Primers used in this study

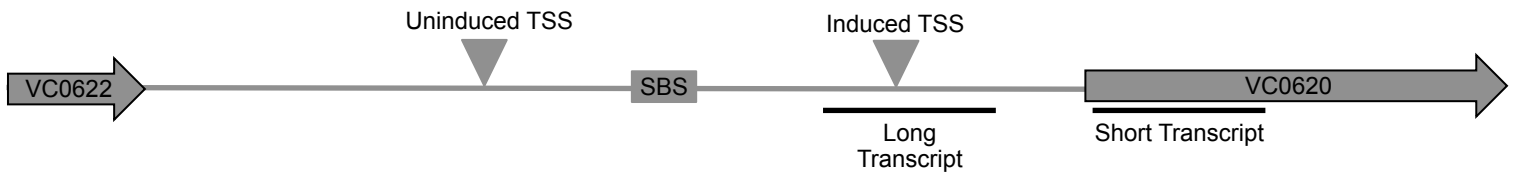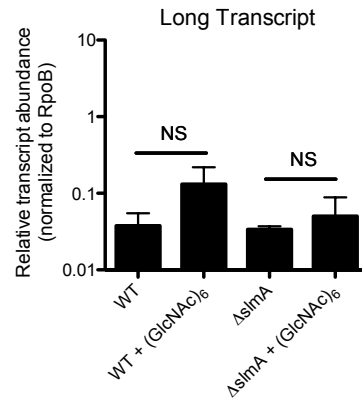

**Fig. S1** - Levels of the long “uninduced”  $P_{chb}$  transcript do not change upon induction with  $(GlcNAc)_6$ . Transcript levels were determined via qRT-PCR using primers specific for the long  $P_{chb}$  transcript. Data are shown as the mean  $\pm$  SD and are from at least three independent biological replicates. **Fig. 1D** shows the qRT-PCR data for the short “induced” transcript.

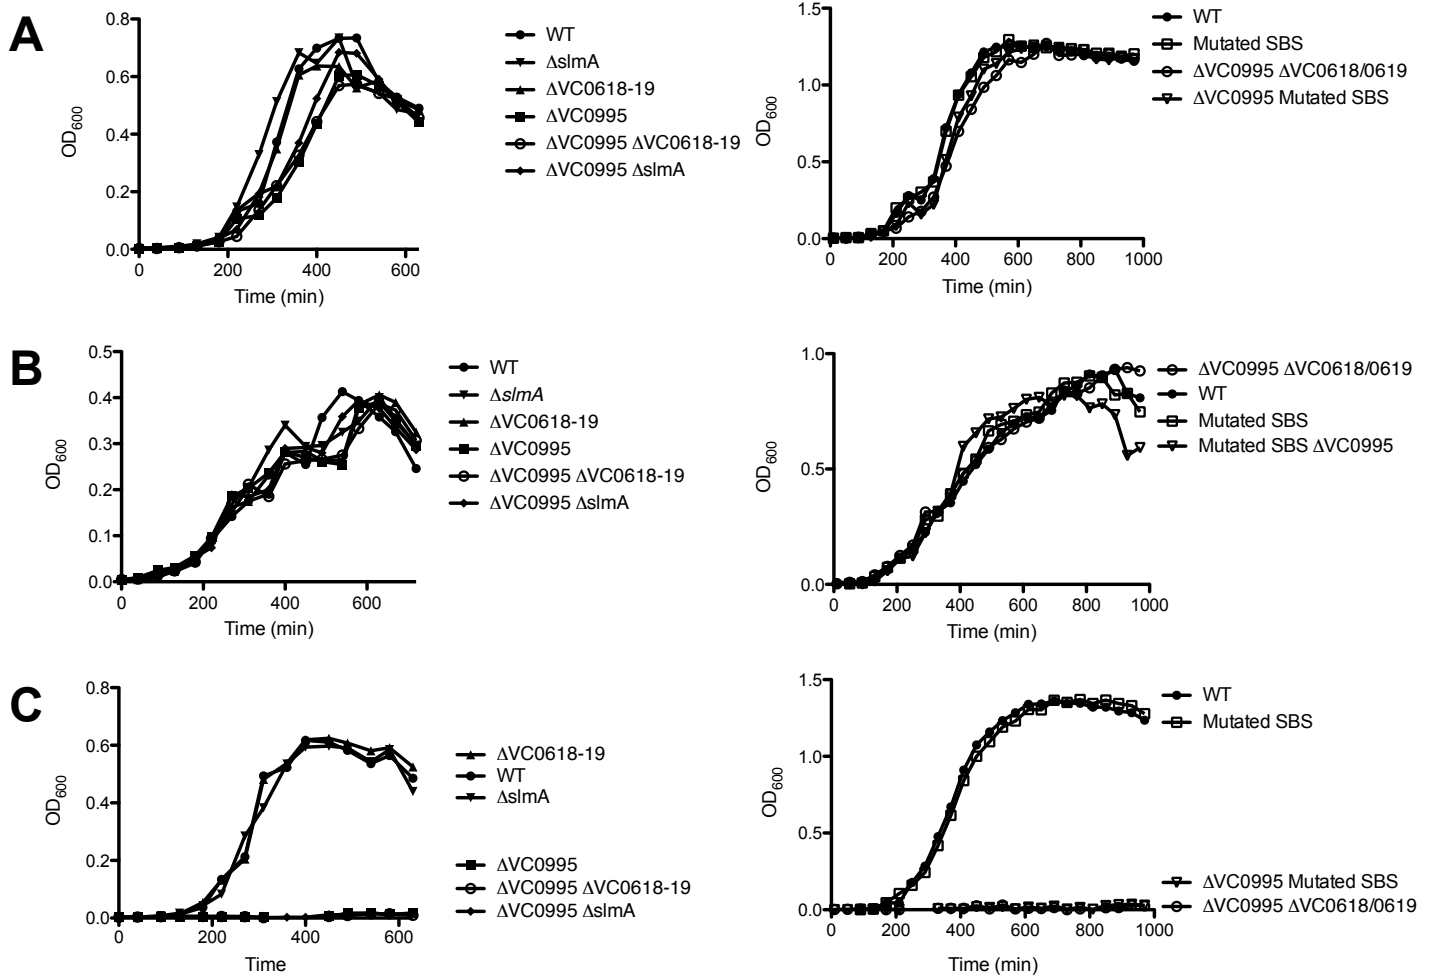

**Fig. S2** – Mutant strains grow as expected on glucose, GlcNAc, and tryptone. Growth curves of the indicated strains in M9 minimal medium containing 0.5% (A) glucose, (B) tryptone, or (C) N-acetylglucosamine (GlcNAc) as a sole carbon source.



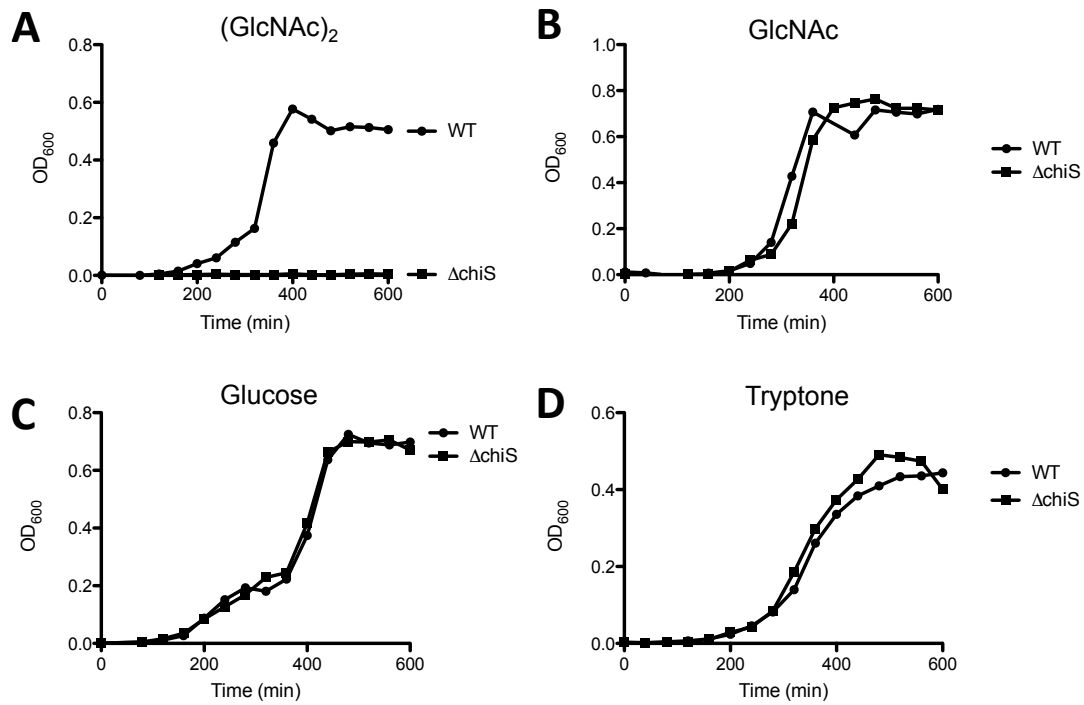

**Fig. S3** – *ChiS* is required for growth on chitobiose. Growth curves of the indicated strains in M9 minimal medium containing 0.5% (A) chitobiose, (B) *N*-acetylglucosamine, (C) glucose, or (D) tryptone as a sole carbon source.

```

                                T31                               E43
                                ↓                               ↓
V.cholerae   1  MAGN--KKINRREEILOALAEMLESNEGASRITTAKLAKQVGVSEAALYRHFPSKARMFE
E.coli       1  MAEKQTAKRNRREEILOSLALMLESSDGSQRITTAKLAASVGVSEAALYRHFPSKTRMFD

                                F63                               R71
                                ↓                               ↓
V.cholerae   59  GLIEFIEESLMSRINRTFDEEKDTLNRIRLVMQLLLAFAERNPGLTRILSGHALMFENER
E.coli       61  SLIEFIEDSLITRINLLLKDEKDTTARLRLIVLLLLLGFAERNPGLTRILTGHALMFEODR

                                                                    R173
                                                                    ↓
V.cholerae   119  LRDRINQLFERIETSLRQILRERKLREGKSFPVDENILAAOLLGOVEGSLNRFVRSDFKY
E.coli       121  LQGRINQLFERIEAOLRQVLREKRMREGEGYTTDETLLASQILAFCEGMLSRFVRSEFKY

V.cholerae   179  LPTANFDEYWALLSAQIK
E.coli       181  RPTDDFDARWPLIAAQLQ

```

**Fig. S4** – Sequence alignment of *SlmA* protein from *V. cholerae* and *E. coli*. Residues highlighted in black are identical and those highlighted in gray are similar. Arrows indicate residues used in site-directed mutational analysis. T31 and E43 are involved in DNA-binding, F63 and R71 are involved in interaction with FtsZ, and R173 is involved in dimerization.

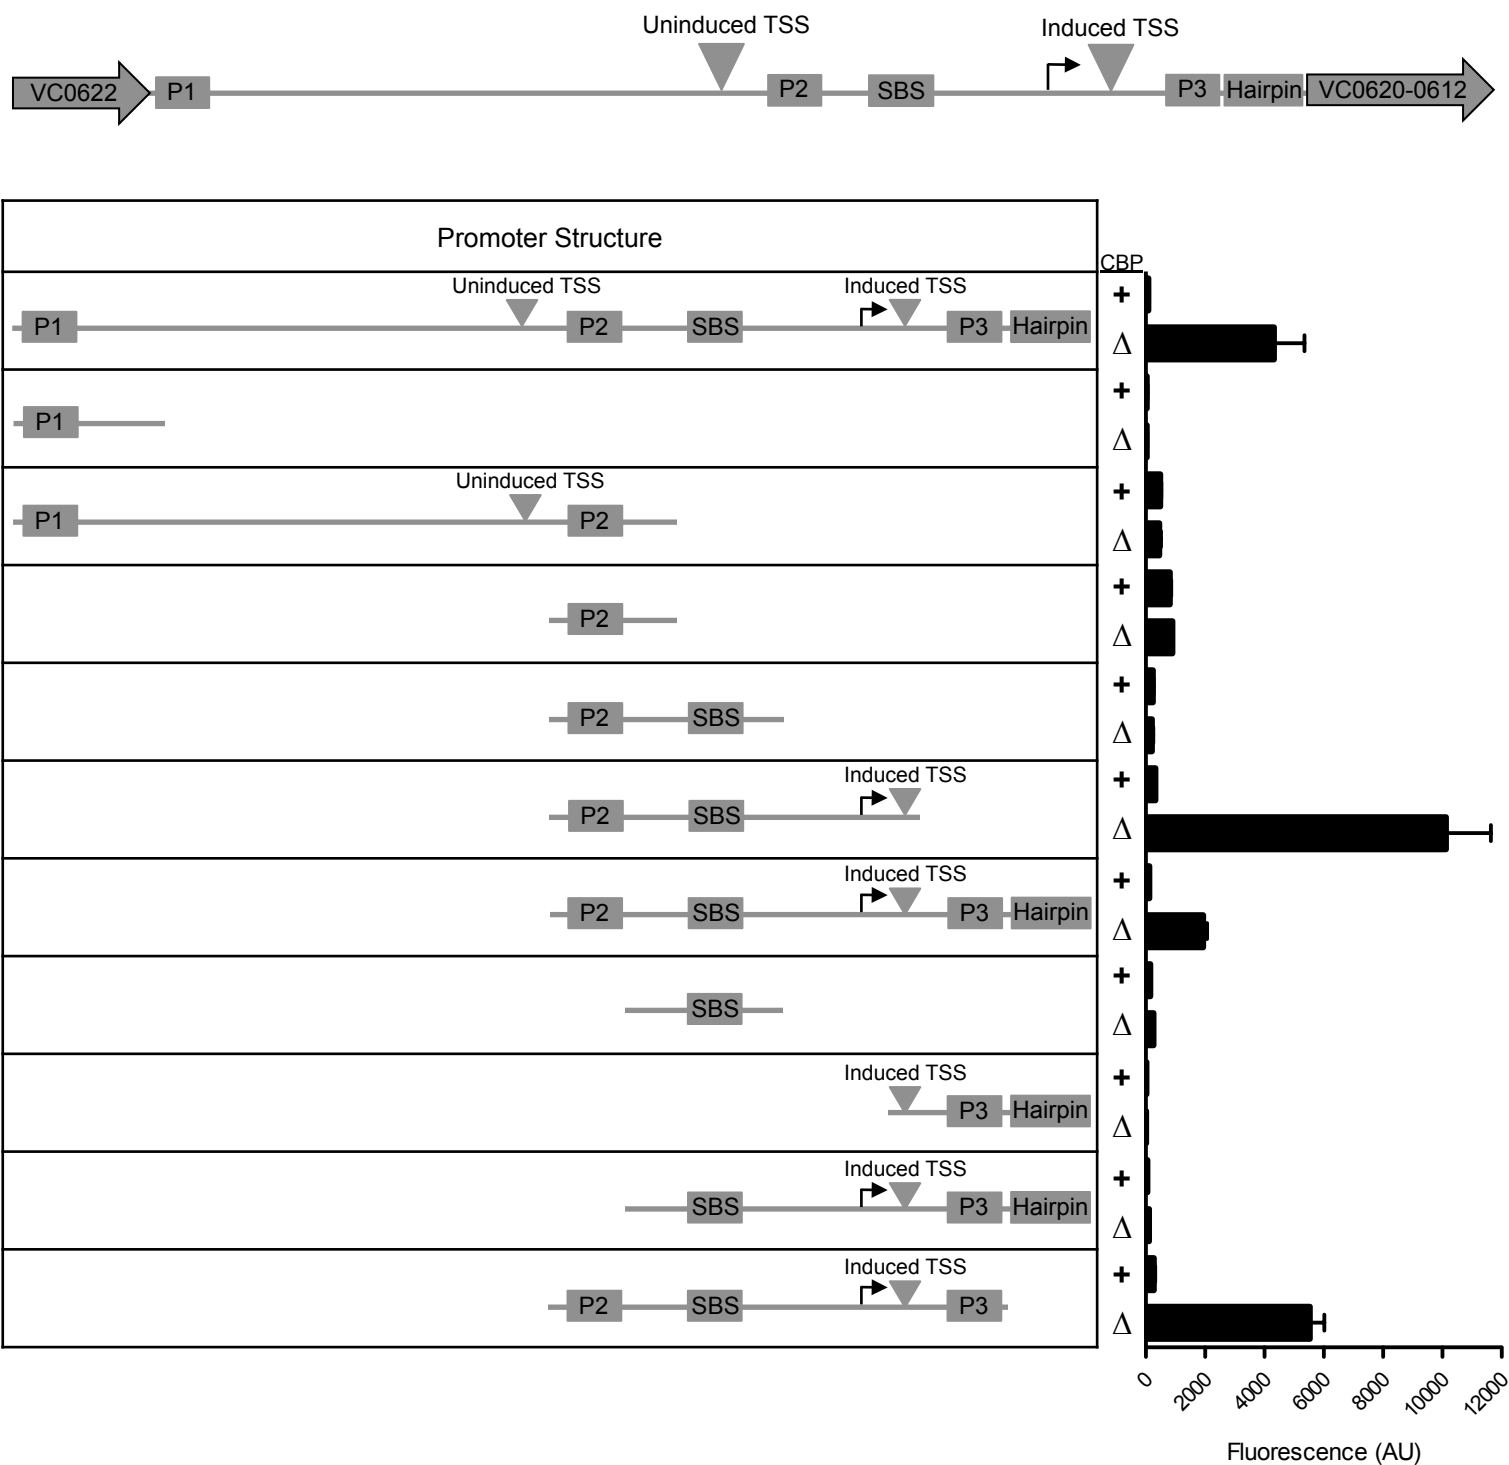

**Fig. S5** - Truncations narrow the region of *P<sub>chb</sub>* required for transcriptional activation. Promoters that were predicted computationally (Softberry BPROM), are indicated as P1, P2, and P3, as well as a putative hairpin. All strains harbor the indicated region of *P<sub>chb</sub>* fused to *gfp* to serve as a transcriptional reporter. Also, strains are either intact for *cbp* (+) or harbor a *cbp* deletion (Δ). Data are shown as the mean ± SD and are from at least three independent biological replicates.

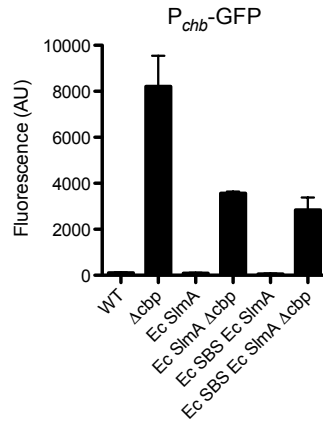

**Fig. S6** – An Ec SBS at  $P_{chb}$  does not enhance activation of  $P_{chb}$  by Ec SImA. GFP fluorescence was measured in the indicated strains, all of which contain a  $P_{chb}$ -*gfp* transcriptional reporter. “Ec SBS” indicates that the native SBS sequence in  $P_{chb}$  was swapped for the consensus SBS binding site for Ec SImA. Data are from at least three independent biological replicates and shown as the mean  $\pm$  SD. Please note that data from the first four bars is identical to that shown in **Fig. 1E**, and are included here to allow for easy comparison to the additional samples included in this figure.

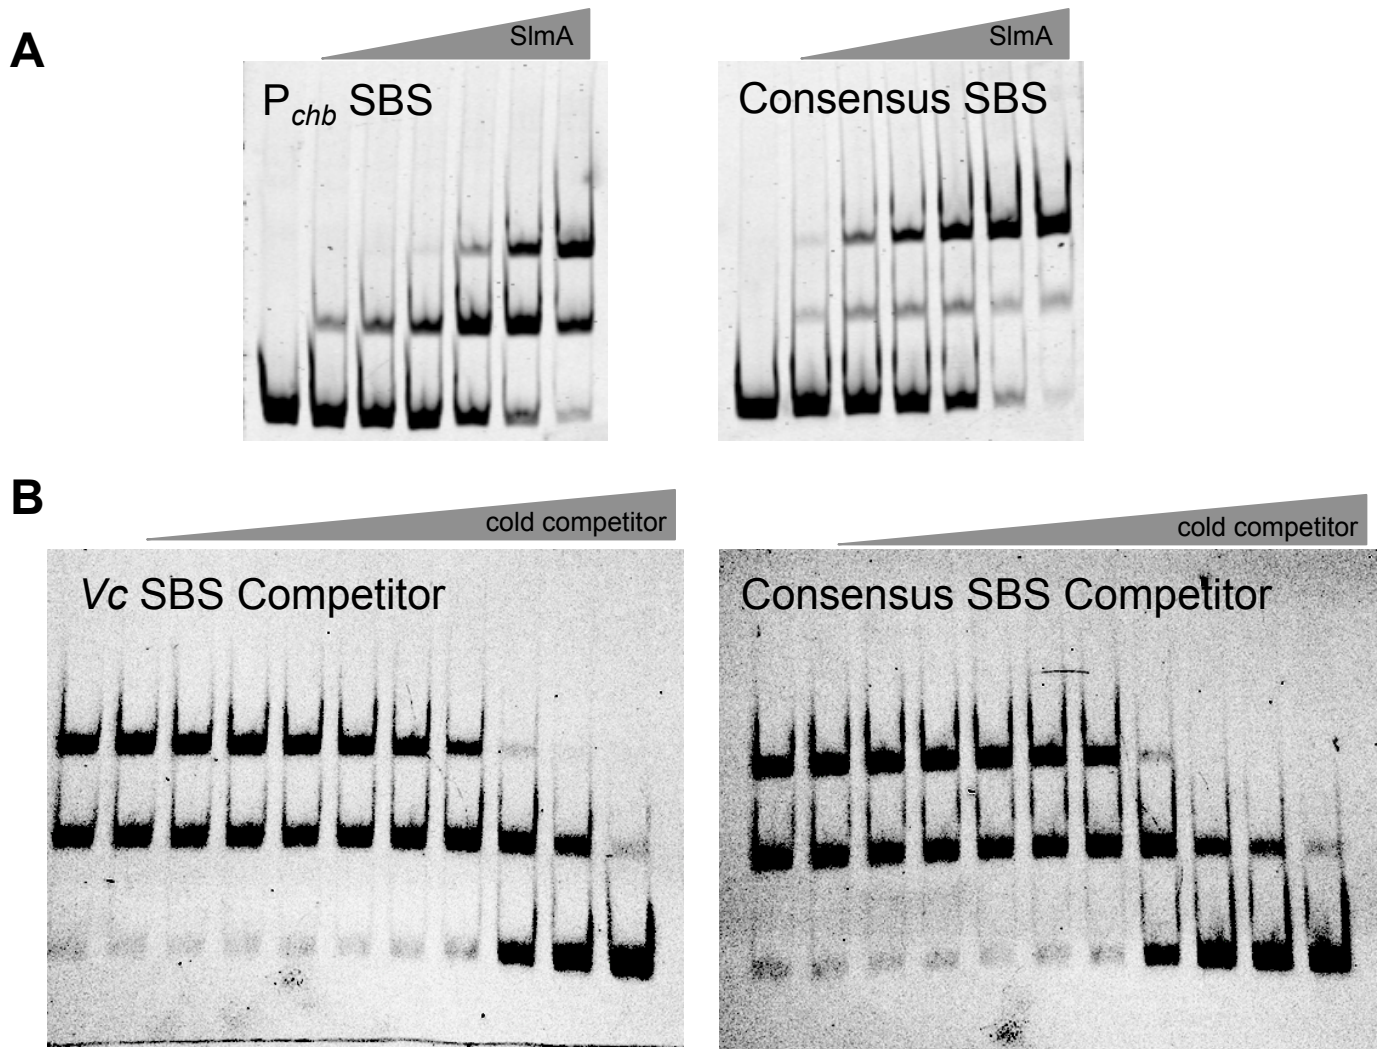

**Fig. S7** - *SlmA* has a higher affinity for a synthetic SBS that represents the consensus sequence for *SlmA* binding in *E. coli* compared to the SBS present in  $P_{chb}$ . **(A)** EMSAs performed where the indicated SBS sequence containing probes were incubated with (from left to right): 0 nM, 7.5 nM, 15 nM, 30 nM, 60 nM, 120 nM, and 240 nM of purified *SlmA*. Data are representative of at least two independent experiments. **(B)** Labeled Vc SBS from  $P_{chb}$  (0.2 nM) was incubated with increasing concentrations of unlabeled Vc SBS from  $P_{chb}$  or the consensus SBS from *E. coli*. Concentrations of unlabeled “cold competitor” probe from left to right are: 0 nM, 0.2 nM, 0.4 nM, 0.8 nM, 1.6 nM, 3.2 nM, 6.4 nM, 12.8 nM, 25.6 nM, 51.2 nM, and 200 nM.

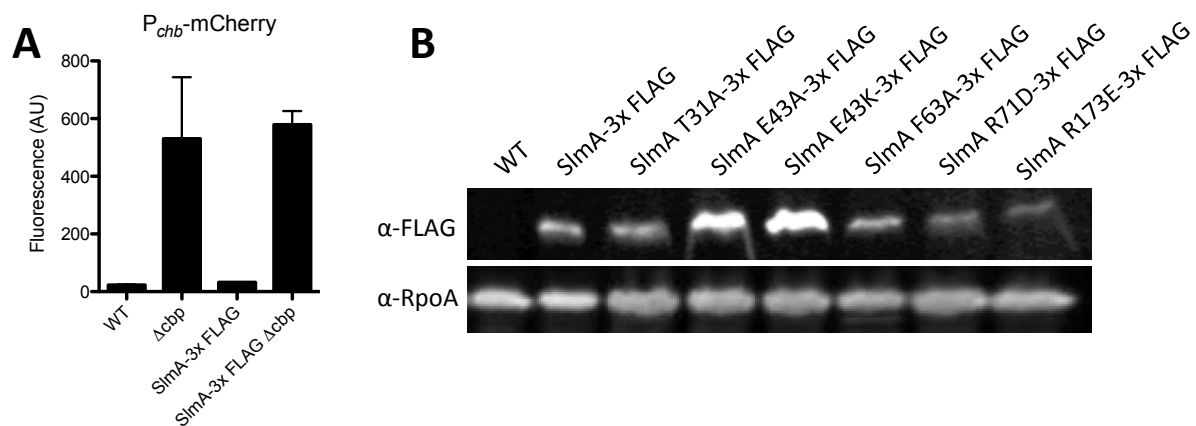

**Fig. S8 – Expression of *SlmA* mutant alleles is similar in vivo.** (A) Fluorescence measurement of strains containing a  $P_{chb}$ -mCherry reporter. Strains with SlmA-3x FLAG were at the native SlmA locus. Data indicates that the SlmA-3x FLAG construct is functional for  $P_{chb}$  activation. (B) *SlmA* site directed-mutants were engineered to contain a 3x FLAG tag at the native locus. Cell lysates of these strains were subjected to Western blot using a FLAG specific antibody and separately with an antibody to RpoA, which served as a loading control.

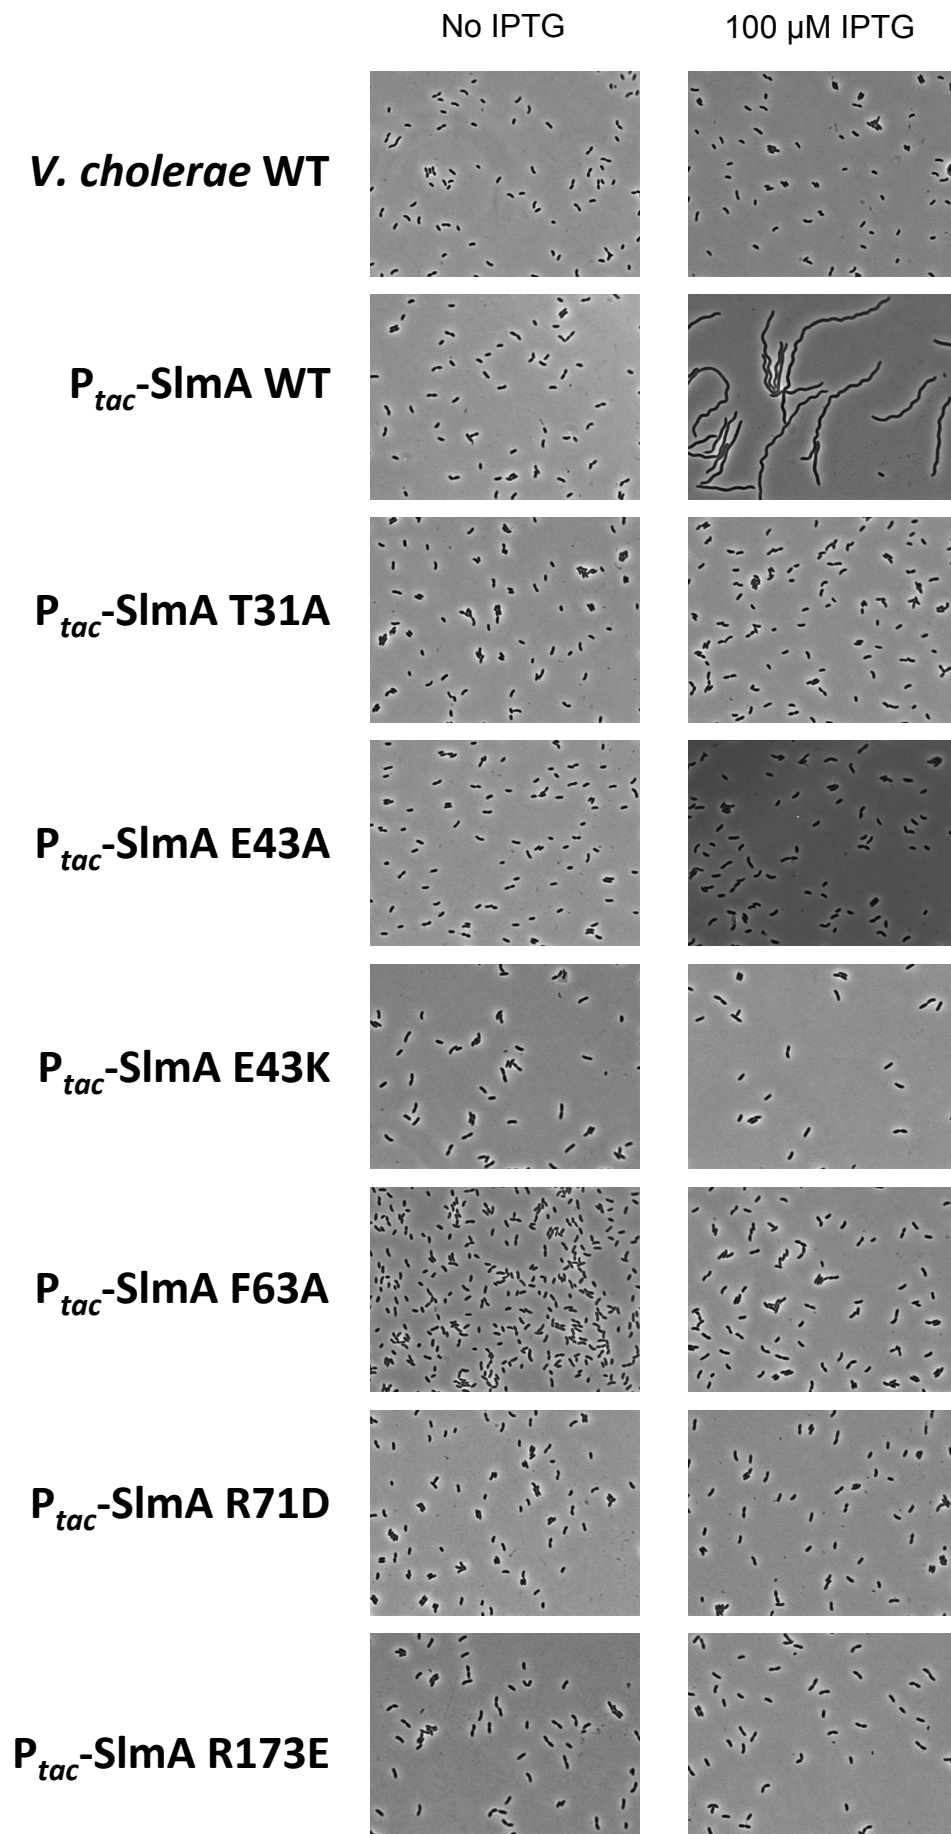

**Fig. S9** - Mutations in *SlmA* that reduce DNA binding or *FtsZ* interaction diminish nucleoid occlusion activity. Strains containing chromosomally integrated constructs for overexpression of the indicated *SlmA* mutants via an IPTG-inducible P<sub>tac</sub> promoter were grown in the presence or absence of 100  $\mu$ M IPTG and imaged by phase contrast microscopy. Data are representative of at least two independent experiments.

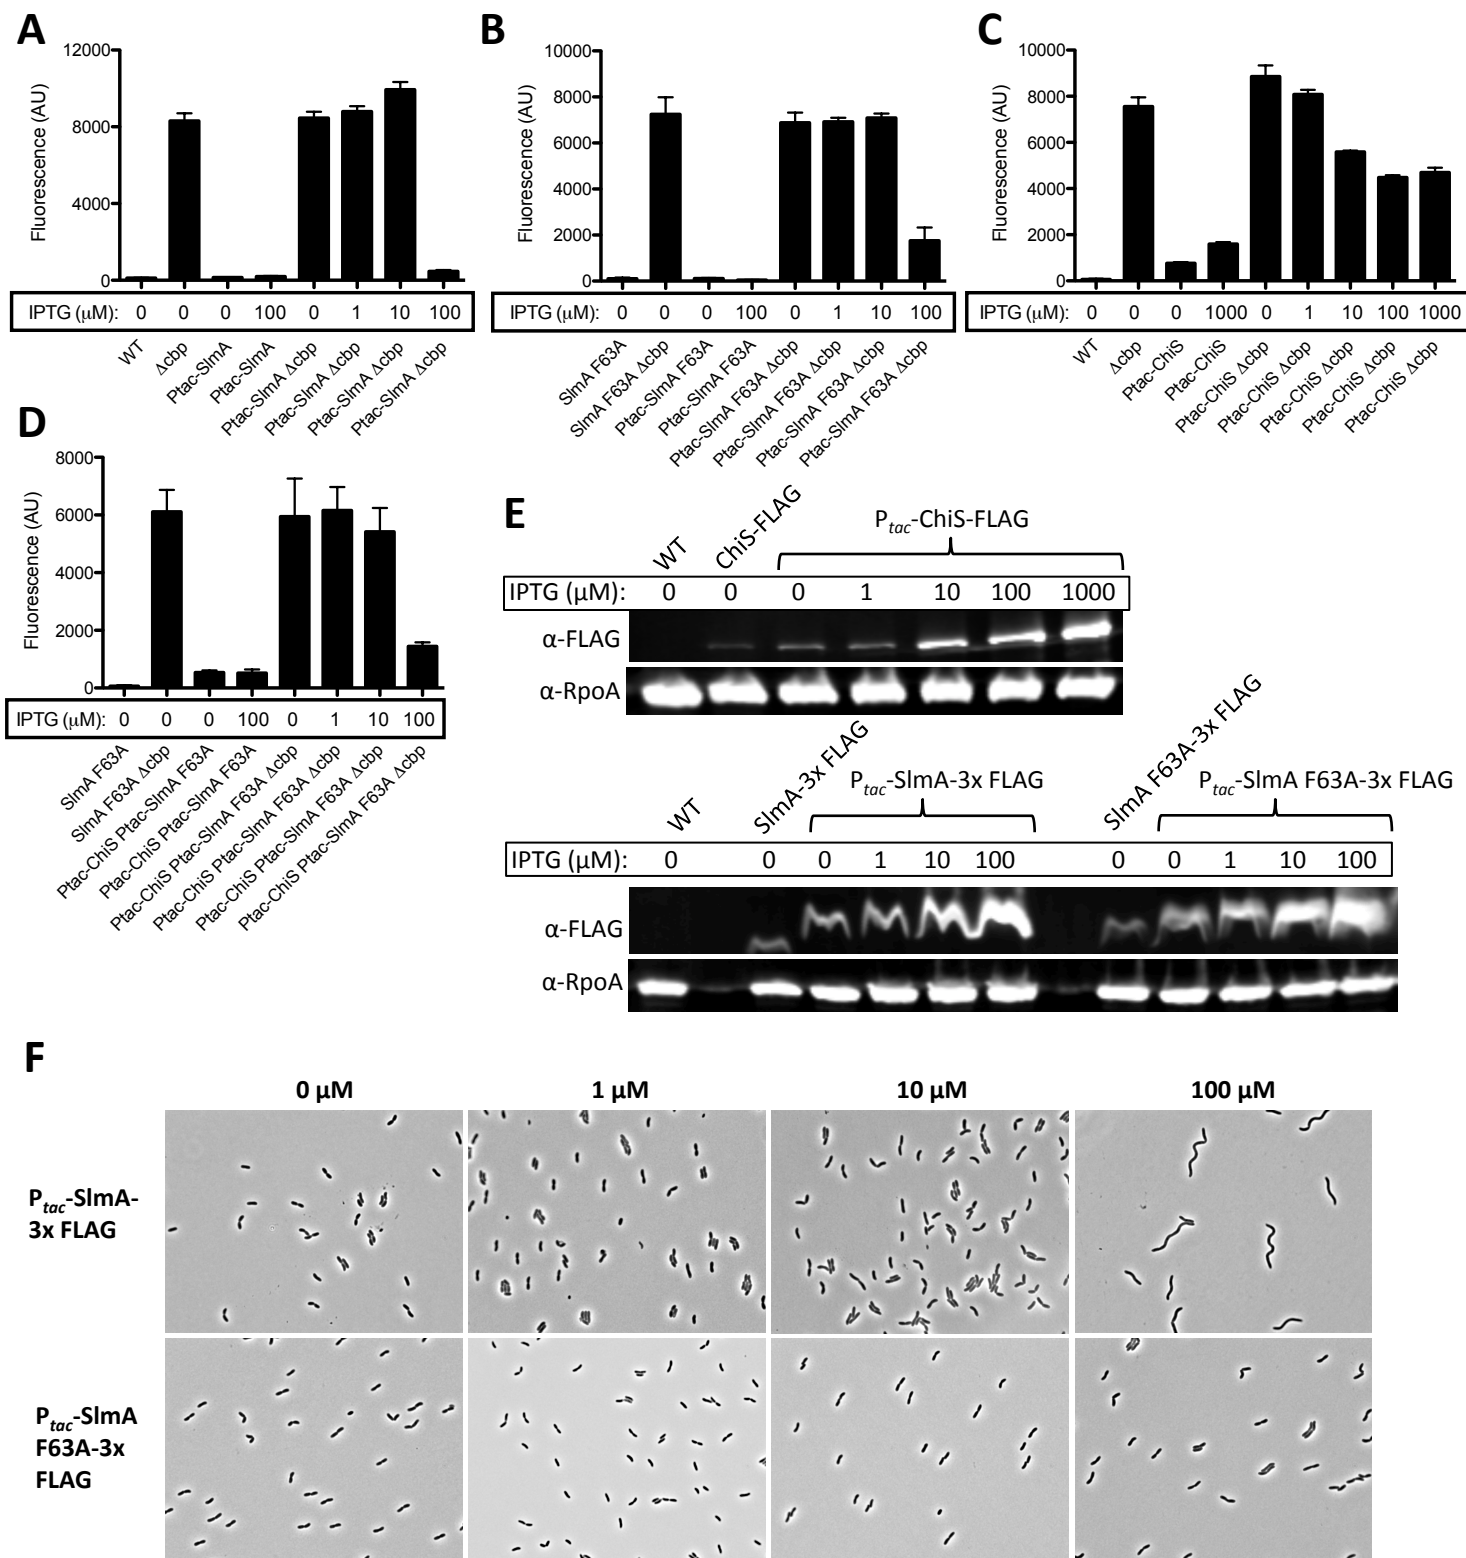

**Fig. S10 - Overexpression of SlmA and ChiS inhibits  $P_{chb}$  activation.** (A-D) GFP fluorescence was assessed in strains that harbor a  $P_{chb}$ -gfp reporter as well as a chromosomally integrated construct for overexpression ( $P_{tac}$ -X) of ChiS and/or SlmA as indicated. All strains were grown with the indicated concentration of IPTG.  $P_{tac}$ -SlmA constructs contained a C-terminal triple FLAG tag, while  $P_{tac}$ -ChiS constructs were untagged because the FLAG tag diminished the activity of this protein. Data are shown as the mean  $\pm$  SD and are from at least three independent biological replicates. (E) Representative western blots of SlmA-3x FLAG and ChiS-FLAG overexpression using the same chromosomally integrated constructs used in A-D for SlmA and a ChiS-FLAG construct. (F) Representative phase contrast images show the morphology of cells ectopically expressing WT SlmA or SlmA F63A using the same mutant constructs and concentrations of IPTG used in A-D.



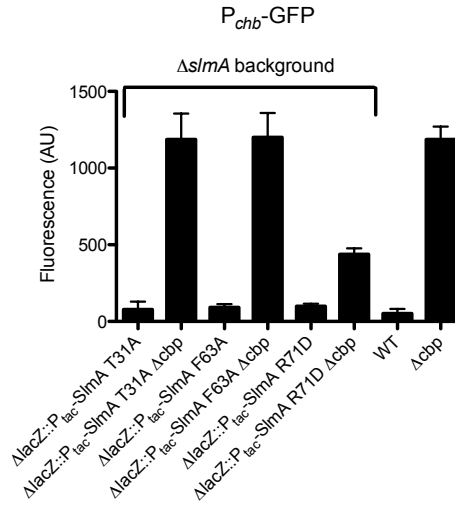

**Fig. S11** - Overexpression of *SlmA* is not sufficient to activate expression of  $P_{chb}$ . GFP fluorescence was assessed in strains that harbor a  $P_{chb}\text{-gfp}$  reporter as well as the other mutations indicated. All strains were grown with 10  $\mu$ M IPTG to overexpress the indicated *SlmA* mutant proteins. Consistent with a model where *SlmA* requires another coactivator, overexpression of these *SlmA* variants was not sufficient to induce expression of  $P_{chb}$ . Data are shown as the mean  $\pm$  SD and are from at least three independent biological replicates.

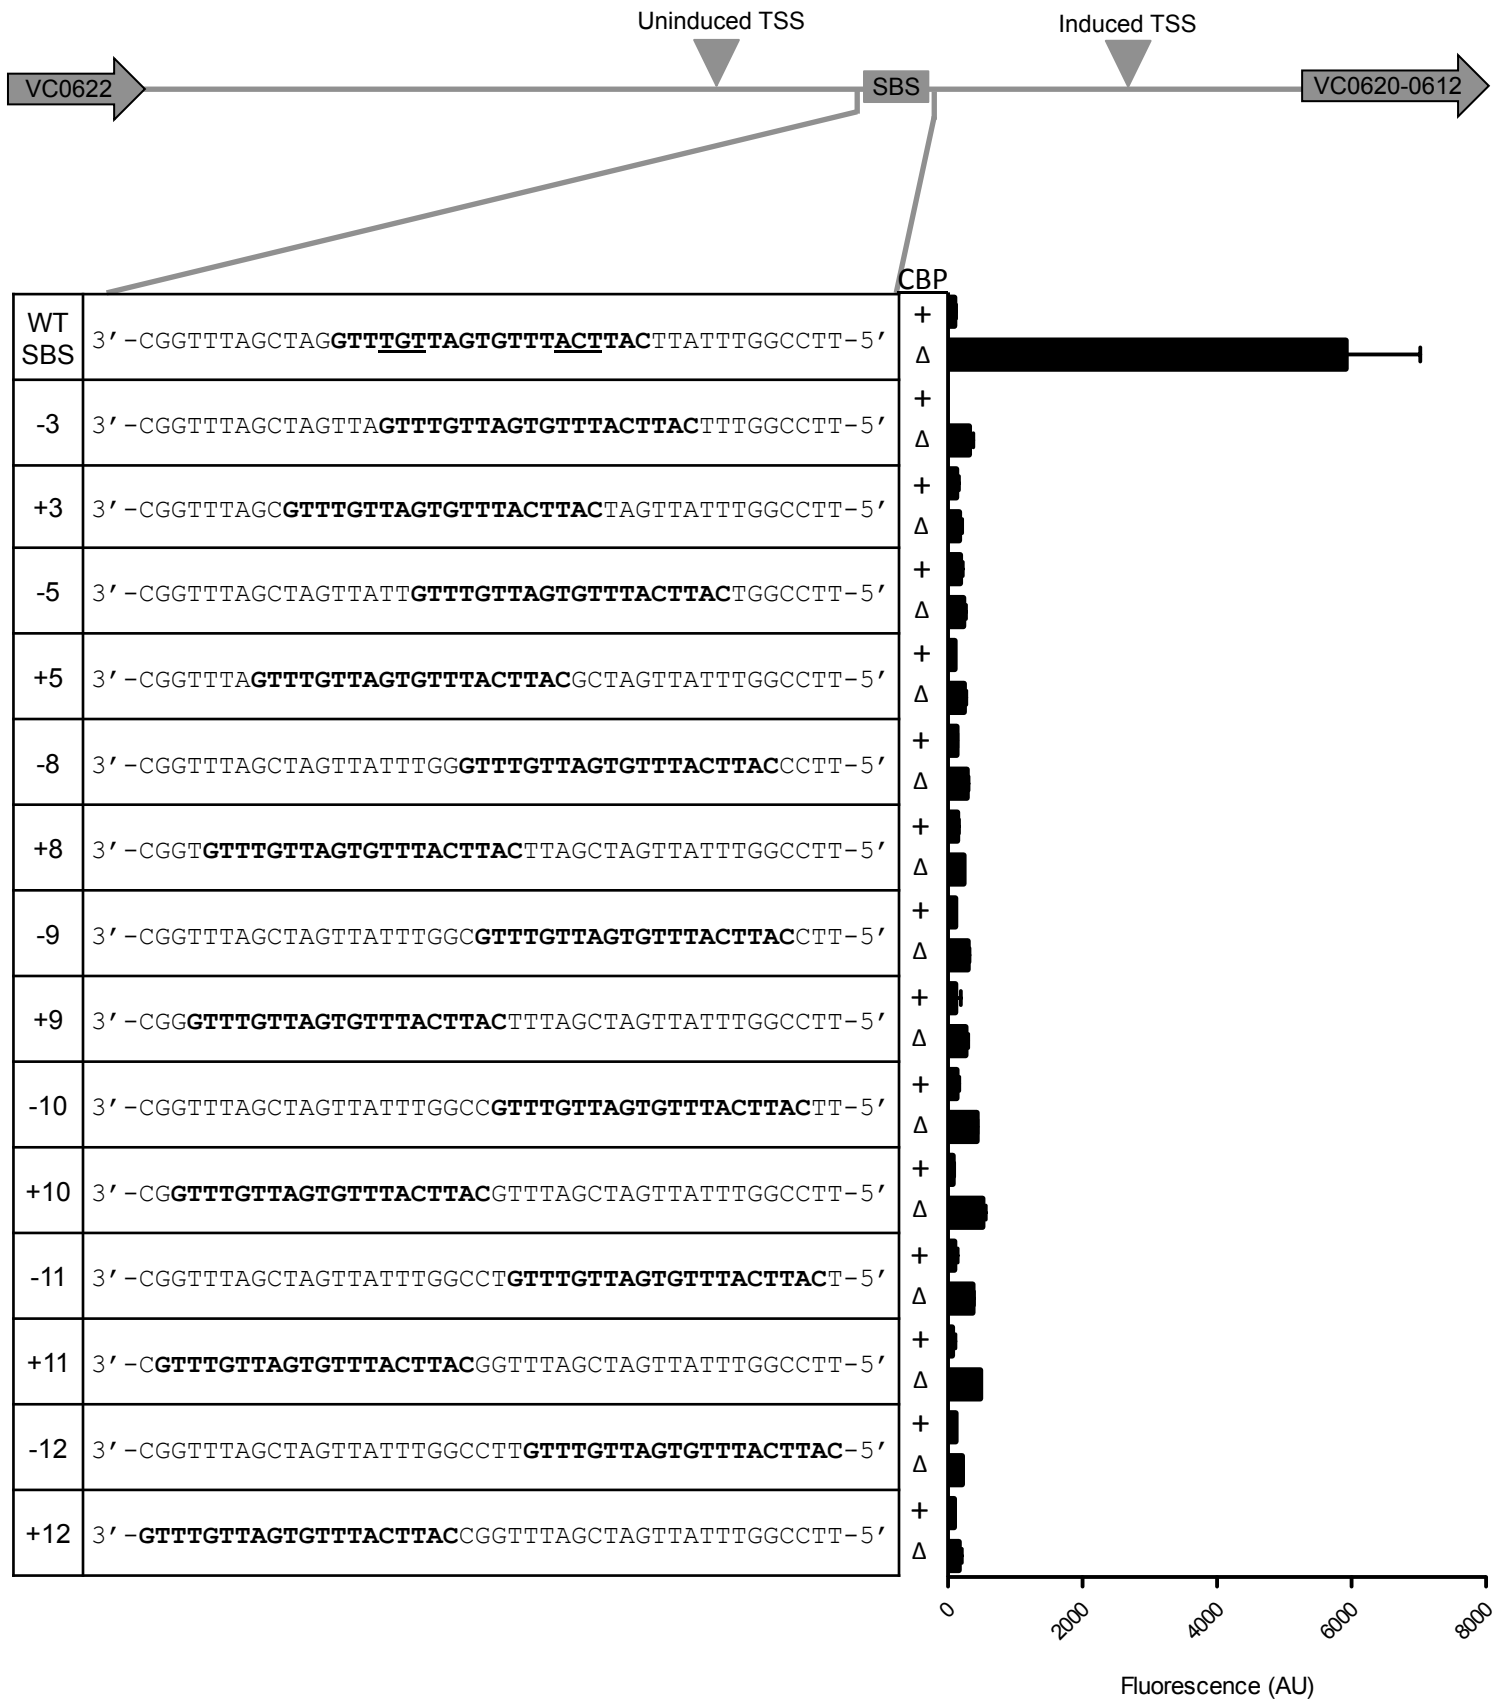

**Fig. S12** - The placement of the SBS in  $P_{chb}$  is critical for transcriptional activation. All strains harbor a  $P_{chb}$ -*gfp* reporter with the indicated mutation to move the SBS sequence as indicated. Each SBS mutation was tested in a background where *cbp* is intact (+) or deleted ( $\Delta$ ). Data are shown as the mean  $\pm$  SD and are from at least three independent biological replicates.

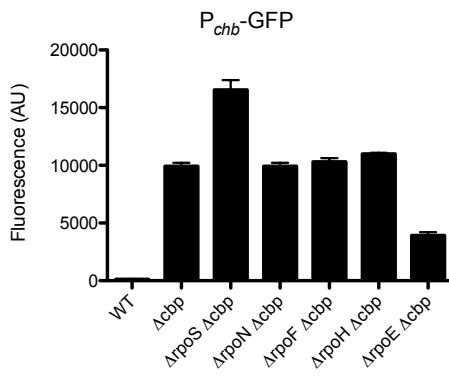

**Fig. S13** – Role of nonessential sigma factors in transcriptional activation of  $P_{chb}$ . GFP fluorescence was assessed in strains that harbor a  $P_{chb}$ -*gfp* reporter with the indicated sigma factor deleted. Data are shown as the mean  $\pm$  SD and are from at least three independent biological replicates.

**Table S1 – Strains used in this study**

| Strain name in manuscript                                 | Genotype and antibiotic resistances                                                                                               | Description                                                                                                                                | Reference / (strain#)                 |
|-----------------------------------------------------------|-----------------------------------------------------------------------------------------------------------------------------------|--------------------------------------------------------------------------------------------------------------------------------------------|---------------------------------------|
| WT                                                        | E7946 Sm <sup>R</sup>                                                                                                             | Wildtype <i>V. cholerae</i> O1 El Tor strain used throughout this study                                                                    | (25)<br>(SAD030)                      |
| <b>Strains Used for Transposon Library</b>                |                                                                                                                                   |                                                                                                                                            |                                       |
| Parent strain used for repressor transposon library       | <i>P<sub>chb</sub>-lacZ</i> , Kan <sup>R</sup> ; pDL1086<br>Amp <sup>R</sup> Cm <sup>R</sup>                                      | CAK 062 parent harboring transposon vector pDL1086                                                                                         | This Study<br>(CAK 065 /<br>SAD 1397) |
| Parent strain used for activator transposon library       | <i>P<sub>chb</sub>-lacZ</i> , Kan <sup>R</sup> ;<br>$\Delta$ CBP::Spec <sup>R</sup> ; pDL1086<br>Amp <sup>R</sup> Cm <sup>R</sup> | CAK 063 parent harboring transposon vector pDL1086                                                                                         | This Study<br>(CAK 066 /<br>SAD 1398) |
| <b>Strains Used for Growth Curves</b>                     |                                                                                                                                   |                                                                                                                                            |                                       |
| $\Delta$ SlmA                                             | $\Delta$ <i>slmA</i> ::Kan <sup>R</sup>                                                                                           | Deletion of <i>slmA</i> replaced with Kan <sup>R</sup>                                                                                     | This Study<br>(CAK 021 /<br>SAD 1392) |
| $\Delta$ VC0995                                           | $\Delta$ VC1807::Spec <sup>R</sup> ;<br>$\Delta$ VC0995                                                                           | A deletion of VC0995 GlcNAc monosaccharide transporter and a deletion of VC1807 replaced with Spec <sup>R</sup> cassette                   | This Study<br>(SAD 265)               |
| $\Delta$ VC0995<br>$\Delta$ VC0618-19                     | $\Delta$ VC1807::Spec <sup>R</sup> ;<br>$\Delta$ VC0995; $\Delta$ VC0618-<br>19::Kan <sup>R</sup>                                 | SAD 265 parent with a deletion of VC0618 and VC0619 replaced with Kan <sup>R</sup>                                                         | This Study<br>(CAK 072 /<br>SAD 1399) |
| $\Delta$ VC0995 $\Delta$ <i>slmA</i>                      | $\Delta$ VC1807::Spec <sup>R</sup> ;<br>$\Delta$ VC0995; $\Delta$ <i>slmA</i> ::Tm <sup>R</sup>                                   | SAD 265 parent with a deletion of <i>slmA</i> replaced with Tm <sup>R</sup>                                                                | This Study<br>(CAK 073 /<br>SAD 1400) |
| $\Delta$ VC0618-19                                        | $\Delta$ VC0618-19::Kan <sup>R</sup>                                                                                              | Deletion of VC0618 and VC0619 replaced with KanR                                                                                           | This Study<br>(SAD 382)               |
| Scrambled SBS                                             | <i>P<sub>chb</sub></i> Scrambled SBS;<br>$\Delta$ VC1807::Kan <sup>R</sup>                                                        | SBS at native <i>P<sub>chb</sub></i> promoter was scrambled and VC1807 was replaced with Kan <sup>R</sup>                                  | This Study<br>(CAK 172 /<br>SAD 1439) |
| Scrambled SBS<br>$\Delta$ VC0995                          | <i>P<sub>chb</sub></i> Scrambled SBS;<br>$\Delta$ VC1807::Kan <sup>R</sup> ; $\Delta$ VC0995                                      | SAD 265 parent; SBS at native promoter was scrambled and Kan <sup>R</sup> cassette swapped for Spec <sup>R</sup> cassette at VC1807        | This Study<br>(CAK 173 /<br>SAD 1440) |
| $\Delta$ <i>chiS</i>                                      | $\Delta$ <i>chiS</i> ::Spec <sup>R</sup>                                                                                          | A deletion of <i>chiS</i> replaced with Spec <sup>R</sup>                                                                                  | This study<br>(SAD 117)               |
| <b>Strains Used for LacZ Activity</b>                     |                                                                                                                                   |                                                                                                                                            |                                       |
| Parent LacZ reporter                                      | <i>P<sub>chb</sub>-lacZ</i> , Kan <sup>R</sup>                                                                                    | <i>P<sub>chb</sub>-lacZ</i> transcriptional reporter                                                                                       | This Study<br>(CAK 062 /<br>SAD 1395) |
| $\Delta$ CBP LacZ reporter                                | <i>P<sub>chb</sub>-lacZ</i> , Kan <sup>R</sup> ;<br>$\Delta$ CBP::Spec <sup>R</sup>                                               | <i>P<sub>chb</sub>-lacZ</i> transcriptional reporter with a deletion of CBP replaced with Spec <sup>R</sup> cassette                       | This Study<br>(CAK 063 /<br>SAD 1396) |
| $\Delta$ CBP $\Delta$ <i>slmA</i> LacZ reporter           | <i>P<sub>chb</sub>-lacZ</i> , Kan <sup>R</sup> ;<br>$\Delta$ CBP::Spec <sup>R</sup> ; $\Delta$ <i>slmA</i> ::Tm <sup>R</sup>      | CAK 062 parent with a deletion of <i>slmA</i> replaced with Tm <sup>R</sup> and a deletion of CBP replaced with Spec <sup>R</sup> cassette | This Study<br>(CAK 075 /<br>SAD 1401) |
| $\Delta$ ChiS $\Delta$ CBP LacZ reporter                  | <i>P<sub>chb</sub>-lacZ</i> , Kan <sup>R</sup> ;<br>$\Delta$ ChiS::TmR;<br>$\Delta$ CBP::Spec <sup>R</sup>                        | CAK 062 parent with a deletion of ChiS replaced with Tm <sup>R</sup> and a deletion of CBP replaced with Spec <sup>R</sup>                 | This Study<br>(CAK 209 /<br>SAD 1460) |
| <b>Strains Used for <i>P<sub>chb</sub></i>-GFP Assays</b> |                                                                                                                                   |                                                                                                                                            |                                       |

|                                                             |                                                                                                                                 |                                                                                                                                                                                                           |                                 |
|-------------------------------------------------------------|---------------------------------------------------------------------------------------------------------------------------------|-----------------------------------------------------------------------------------------------------------------------------------------------------------------------------------------------------------|---------------------------------|
| WT GFP reporter, WT SBS GFP reporter                        | $\Delta lacZ::P_{chb}\text{-GFP Kan}^R$                                                                                         | A deletion of <i>lacZ</i> replaced with $P_{chb}\text{-GFP}$ transcriptional fusion linked to $\text{Kan}^R$                                                                                              | This Study (CAK 007 / SAD 590)  |
| $\Delta$ CBP GFP reporter, WT SBS $\Delta$ CBP GFP reporter | $\Delta lacZ::P_{chb}\text{-GFP Kan}^R$ ; $\Delta$ CBP::Spec <sup>R</sup>                                                       | CAK 007 parent with a deletion of CBP replaced with Spec <sup>R</sup> cassette                                                                                                                            | This Study (CAK 009 / SAD 1390) |
| $\Delta$ CBP $\Delta$ ChiS GFP reporter                     | $\Delta lacZ::P_{chb}\text{-GFP Kan}^R$ ; $\Delta$ CBP::Spec <sup>R</sup> ; $\Delta$ ChiS::Tm <sup>R</sup>                      | CAK 007 parent with a deletion of CBP replaced with Spec <sup>R</sup> cassette and a deletion of ChiS replaced with Tm <sup>R</sup> cassette                                                              | This Study (CAK 010 / SAD 1391) |
| $\Delta$ SlmA GFP reporter                                  | $\Delta lacZ::P_{chb}\text{-GFP, Kan}^R$ ; $\Delta slmA::\text{Tm}^R$                                                           | CAK 007 parent with a deletion of <i>slmA</i> replaced with Tm <sup>R</sup> cassette                                                                                                                      | This Study (CAK 024 / SAD 1393) |
| $\Delta$ SlmA $\Delta$ CBP GFP Reporter                     | $\Delta lacZ::P_{chb}\text{-GFP, Kan}^R$ ; $\Delta slmA::\text{Tm}^R$ ; $\Delta$ CBP::Spec <sup>R</sup>                         | CAK 007 parent with a deletion of <i>slmA</i> replaced with Tm <sup>R</sup> cassette and a deletion of CBP replaced with Spec <sup>R</sup> cassette                                                       | This Study (CAK 025 / 1394)     |
| Scrambled SBS                                               | $\Delta lacZ::P_{chb}\text{-GFP}$ with scrambled SBS                                                                            | A deletion of <i>lacZ</i> replaced with $P_{chb}\text{-GFP}$ transcriptional fusion linked to $\text{Kan}^R$ ; SBS in promoter element was “scrambled”                                                    | This Study (CAK 088 / SAD 1402) |
| pMMB SlmA $\Delta$ CBP                                      | $\Delta lacZ::P_{chb}\text{-GFP, Kan}^R$ ; $\Delta slmA::\text{Tm}^R$ ; $\Delta$ CBP::Spec <sup>R</sup> ; pMMB67EH SlmA         | CAK 025 parent harboring pMMB67EH with <i>slmA</i> insert                                                                                                                                                 | This Study (CAK 299 / SAD 1480) |
| pMMB $\Delta$ CBP                                           | $\Delta lacZ::P_{chb}\text{-GFP, Kan}^R$ ; $\Delta slmA::\text{Tm}^R$ ; $\Delta$ CBP::Spec <sup>R</sup> ; pMMB67EH empty vector | CAK 025 parent harboring pMMB67EH with no insert                                                                                                                                                          | This Study (CAK 300 / SAD 1481) |
| Scrambled SBS $\Delta$ CBP                                  | $\Delta lacZ::P_{chb}\text{-GFP}$ with scrambled SBS; $\Delta$ CBP::Spec <sup>R</sup>                                           | A deletion of <i>lacZ</i> replaced with $P_{chb}\text{-GFP}$ transcriptional fusion linked to $\text{Kan}^R$ ; SBS in promoter element was “scrambled”; a deletion of CBP replaced with Spec <sup>R</sup> | This Study (CAK 089 / SAD 1403) |
| WT SlmA GFP reporter                                        | $\Delta lacZ::P_{chb}\text{-GFP, Kan}^R$ ; $\Delta VC1807::\text{Spec}^R$                                                       | CAK 024 parent with WT SlmA knocked back in at native locus; has the same phenotype as CAK 007                                                                                                            | This Study (CAK 093 / SAD 1404) |
| WT SlmA $\Delta$ CBP GFP reporter                           | $\Delta lacZ::P_{chb}\text{-GFP, Kan}^R$ ; $\Delta$ CBP::Spec <sup>R</sup>                                                      | CAK 024 parent with WT SlmA knocked back in at native locus and a deletion of CBP replaced with Spec <sup>R</sup> ; has the same phenotype as CAK 009                                                     | This Study (CAK 094 / SAD 1405) |
| SlmA T31A GFP reporter                                      | $\Delta lacZ::P_{chb}\text{-GFP, Kan}^R$ ; $\Delta VC1807::\text{Spec}^R$ ; SlmA T31A                                           | CAK 024 parent with SlmA T31A knocked back in at native locus                                                                                                                                             | This Study (CAK 095 / SAD 1406) |
| SlmA T31A $\Delta$ CBP GFP reporter                         | $\Delta lacZ::P_{chb}\text{-GFP, Kan}^R$ ; $\Delta$ CBP::Spec <sup>R</sup> ; SlmA T31A                                          | CAK 024 parent with SlmA T31A knocked back in at native locus and a deletion of CBP replaced with Spec <sup>R</sup>                                                                                       | This Study (CAK 096 / SAD 1407) |
| SlmA E43A GFP reporter                                      | $\Delta lacZ::P_{chb}\text{-GFP, Kan}^R$ ; $\Delta VC1807::\text{Spec}^R$ ; SlmA E43A                                           | CAK 024 parent with SlmA E43A knocked back in at native locus                                                                                                                                             | This Study (CAK 143 / SAD 1430) |

|                                      |                                                                                                         |                                                                                                                                                                                                |                                 |
|--------------------------------------|---------------------------------------------------------------------------------------------------------|------------------------------------------------------------------------------------------------------------------------------------------------------------------------------------------------|---------------------------------|
| SlmA E43A $\Delta$ CBP GFP reporter  | $\Delta lacZ::P_{chb}$ -GFP, Kan <sup>R</sup> ; $\Delta$ CBP::Spec <sup>R</sup> ; SlmA E43A             | CAK 024 parent with SlmA E43A knocked back in at native locus and a deletion of CBP replaced with Spec <sup>R</sup>                                                                            | This Study (CAK 144 / SAD 1431) |
| SlmA F63A GFP reporter               | $\Delta lacZ::P_{chb}$ -GFP, Kan <sup>R</sup> ; $\Delta$ VC1807::Spec <sup>R</sup> ; SlmA F63A          | CAK 024 parent with SlmA F63A knocked back in at native locus                                                                                                                                  | This Study (CAK 097 / SAD 1408) |
| SlmA F63A $\Delta$ CBP GFP reporter  | $\Delta lacZ::P_{chb}$ -GFP, Kan <sup>R</sup> ; $\Delta$ CBP::Spec <sup>R</sup> ; SlmA F63A             | CAK 024 parent with SlmA F63A knocked back in at native locus and a deletion of CBP replaced with Spec <sup>R</sup>                                                                            | This Study (CAK 098 / SAD 1409) |
| SlmA R71D GFP reporter               | $\Delta lacZ::P_{chb}$ -GFP, Kan <sup>R</sup> ; $\Delta$ VC1807::Spec <sup>R</sup> ; SlmA R71D          | CAK 024 parent with SlmA R71D knocked back in at native locus                                                                                                                                  | This Study (CAK 099 / SAD 1410) |
| SlmA R71D $\Delta$ CBP GFP reporter  | $\Delta lacZ::P_{chb}$ -GFP, Kan <sup>R</sup> ; $\Delta$ CBP::Spec <sup>R</sup> ; SlmA R71D             | CAK 024 parent with SlmA R71D knocked back in at native locus and a deletion of CBP replaced with Spec <sup>R</sup>                                                                            | This Study (CAK 108 / SAD 1413) |
| SlmA R173E GFP reporter              | $\Delta lacZ::P_{chb}$ -GFP, Kan <sup>R</sup> ; $\Delta$ VC1807::Spec <sup>R</sup> ; SlmA R173E         | CAK 024 parent with SlmA R173E knocked back in at native locus                                                                                                                                 | This Study (CAK 193 / SAD 1452) |
| SlmA R173E $\Delta$ CBP GFP reporter | $\Delta lacZ::P_{chb}$ -GFP, Kan <sup>R</sup> ; $\Delta$ CBP::Spec <sup>R</sup> ; SlmA R173E            | CAK 024 parent with SlmA R173E knocked back in at native locus and a deletion of CBP replaced with Spec <sup>R</sup>                                                                           | This Study (CAK 194 / SAD 1453) |
| Ec SlmA GFP reporter                 | $\Delta lacZ::P_{chb}$ -GFP, Kan <sup>R</sup> ; $\Delta$ VC1807::Spec <sup>R</sup> ; Ec SlmA            | CAK 024 parent with SlmA from <i>E. coli</i> knocked back in at native locus                                                                                                                   | This Study (CAK 100 / SAD 1411) |
| Ec SlmA $\Delta$ CBP GFP reporter    | $\Delta lacZ::P_{chb}$ -GFP, Kan <sup>R</sup> ; $\Delta$ CBP::Spec <sup>R</sup> ; Ec SlmA               | CAK 024 parent with SlmA from <i>E. coli</i> knocked back in at native locus and a deletion of CBP replaced with Spec <sup>R</sup>                                                             | This Study (CAK 101 / SAD 1412) |
| Ec SBS GFP reporter                  | $\Delta lacZ::P_{chb}$ -GFP with Ec SBS                                                                 | A deletion of <i>lacZ</i> replaced with <i>P<sub>chb</sub></i> -GFP transcriptional fusion linked to Kan <sup>R</sup> ; SBS in promoter element was replaced with <i>E. coli</i> consensus SBS | This Study (CAK 168 / SAD 1438) |
| Ec SBS GFP reporter $\Delta$ CBP     | $\Delta lacZ::P_{chb}$ -GFP with Ec SBS; $\Delta$ CBP::Spec <sup>R</sup>                                | CAK 168 parent with a deletion of CBP replaced with Spec <sup>R</sup>                                                                                                                          | This Study (CAK 197 / SAD 1455) |
| P1                                   | $\Delta lacZ::P1$ of <i>P<sub>chb</sub></i> -GFP, Kan <sup>R</sup>                                      | <i>P<sub>chb</sub></i> truncation fused to GFP linked to Kan <sup>R</sup>                                                                                                                      | This Study (SAD 903)            |
| P1 $\Delta$ CBP                      | $\Delta lacZ::P1$ of <i>P<sub>chb</sub></i> -GFP, Kan <sup>R</sup> ; $\Delta$ CBP::Spec <sup>R</sup>    | <i>P<sub>chb</sub></i> truncation fused to GFP linked to Kan <sup>R</sup> and a deletion of CBP replaced with Spec <sup>R</sup>                                                                | This Study (SAD 904)            |
| P1+P2                                | $\Delta lacZ::P1+P2$ of <i>P<sub>chb</sub></i> -GFP, Kan <sup>R</sup>                                   | <i>P<sub>chb</sub></i> truncation fused to GFP linked to Kan <sup>R</sup>                                                                                                                      | This Study (SAD 912)            |
| P1+P2 $\Delta$ CBP                   | $\Delta lacZ::P1+P2$ of <i>P<sub>chb</sub></i> -GFP, Kan <sup>R</sup> ; $\Delta$ CBP::Spec <sup>R</sup> | <i>P<sub>chb</sub></i> truncation fused to GFP linked to Kan <sup>R</sup> and a deletion of CBP replaced with Spec <sup>R</sup>                                                                | This Study (SAD 913)            |
| P2 only                              | $\Delta lacZ::P2$ only of <i>P<sub>chb</sub></i> -GFP, Spec <sup>R</sup>                                | <i>P<sub>chb</sub></i> truncation fused to GFP linked to Spec <sup>R</sup>                                                                                                                     | This Study (CAK 111 / SAD 1415) |

|                                    |                                                                                           |                                                                                                                                                                                                |                                 |
|------------------------------------|-------------------------------------------------------------------------------------------|------------------------------------------------------------------------------------------------------------------------------------------------------------------------------------------------|---------------------------------|
| P2 only $\Delta$ CBP               | $\Delta lacZ::P_2$ only of $P_{chb^-}$ -GFP; $\Delta CBP::Tm^R$                           | $P_{chb}$ truncation fused to GFP linked to $Spec^R$ and a deletion of CBP replaced with $Tm^R$                                                                                                | This Study (CAK 112 / SAD 1416) |
| P2+SBS                             | $\Delta lacZ::P_2+SBS$ of $P_{chb^-}$ -GFP, $Spec^R$                                      | $P_{chb}$ truncation fused to GFP linked to $Spec^R$                                                                                                                                           | This Study (CAK 113 / SAD 1417) |
| P2+SBS $\Delta$ CBP                | $\Delta lacZ::P_2+SBS$ of $P_{chb^-}$ -GFP, $Spec^R$ ; $\Delta CBP::Tm^R$                 | $P_{chb}$ truncation fused to GFP linked to $Spec^R$ and a deletion of CBP replaced with $Tm^R$                                                                                                | This Study (CAK 114 / SAD 1418) |
| P2+SBS more space                  | $\Delta lacZ::P_2+SBS$ more space of $P_{chb^-}$ -GFP, $Spec^R$                           | $P_{chb}$ truncation fused to GFP linked to $Spec^R$                                                                                                                                           | This Study (CAK 116 / SAD 1419) |
| P2+SBS more space $\Delta$ CBP     | $\Delta lacZ::P_2+SBS$ more space of $P_{chb^-}$ -GFP, $Spec^R$ ; $\Delta CBP::Tm^R$      | $P_{chb}$ truncation fused to GFP linked to $Spec^R$ and a deletion of CBP replaced with $Tm^R$                                                                                                | This Study (CAK 117 / SAD 1420) |
| P2+P3                              | $\Delta lacZ::P_2+P_3$ of $P_{chb^-}$ -GFP, $Kan^R$                                       | $P_{chb}$ truncation fused to GFP linked to $Kan^R$                                                                                                                                            | This Study (SAD 907)            |
| P2+P3 $\Delta$ CBP                 | $\Delta lacZ::P_2+P_3$ of $P_{chb^-}$ -GFP, $Kan^R$ ; $\Delta CBP::Spec^R$                | $P_{chb}$ truncation fused to GFP linked to $Kan^R$ and a deletion of CBP replaced with $Spec^R$                                                                                               | This Study (SAD 908)            |
| P2+P3 internal region              | $\Delta lacZ::P_2+P_3$ internal region of $P_{chb^-}$ -GFP, $Spec^R$                      | $P_{chb}$ truncation fused to GFP linked to $Spec^R$                                                                                                                                           | This Study (CAK 129 / SAD 1425) |
| P2+P3 internal region $\Delta$ CBP | $\Delta lacZ::P_2+P_3$ internal region of $P_{chb^-}$ -GFP, $Spec^R$ ; $\Delta CBP::Tm^R$ | $P_{chb}$ truncation fused to GFP linked to $Spec^R$ and a deletion of CBP replaced with $Tm^R$                                                                                                | This Study (CAK 130 / SAD 1426) |
| P3                                 | $\Delta lacZ::P_3$ of $P_{chb^-}$ -GFP, $Kan^R$                                           | $P_{chb}$ truncation fused to GFP linked to $Kan^R$                                                                                                                                            | This Study (SAD 905)            |
| P3 $\Delta$ CBP                    | $\Delta lacZ::P_3$ of $P_{chb^-}$ -GFP, $Kan^R$ ; $\Delta CBP::Spec^R$                    | $P_{chb}$ truncation fused to GFP linked to $Kan^R$ and a deletion of CBP replaced with $Spec^R$                                                                                               | This Study (SAD 906)            |
| P3 only more space                 | $\Delta lacZ::P_3$ only more space of $P_{chb^-}$ -GFP, $Spec^R$                          | $P_{chb}$ truncation fused to GFP linked to $Spec^R$                                                                                                                                           | This Study (CAK 119 / SAD 1421) |
| P3 only more space $\Delta$ CBP    | $\Delta lacZ::P_3$ only more space of $P_{chb^-}$ -GFP, $Spec^R$ ; $\Delta CBP::Tm^R$     | $P_{chb}$ truncation fused to GFP linked to $Spec^R$ and a deletion of CBP replaced with $Tm^R$                                                                                                | This Study (CAK 120 / SAD 1422) |
| $\Delta$ Hairpin                   | $\Delta lacZ::\Delta$ hairpin of $P_{chb^-}$ -GFP, $Spec^R$                               | $P_{chb}$ truncation fused to GFP linked to $Spec^R$                                                                                                                                           | This Study (CAK 121 / SAD 1423) |
| $\Delta$ Hairpin $\Delta$ CBP      | $\Delta lacZ::\Delta$ hairpin of $P_{chb^-}$ -GFP, $Spec^R$ ; $\Delta CBP::Tm^R$          | $P_{chb}$ truncation fused to GFP linked to $Spec^R$ and a deletion of CBP replaced with $Tm^R$                                                                                                | This Study (CAK 122 / SAD 1424) |
| -3 SBS                             | $\Delta lacZ::P_{chb^-}$ -GFP, $Kan^R$ ; -3 SBS                                           | A deletion of $lacZ$ replaced with $P_{chb^-}$ -GFP transcriptional fusion linked to $Kan^R$ ; SBS in promoter element was moved 3 bp downstream                                               | This Study (CAK 179 / SAD 1441) |
| -3 SBS $\Delta$ CBP                | $\Delta lacZ::P_{chb^-}$ -GFP, $Kan^R$ ; -3 SBS; $\Delta CBP::Spec^R$                     | A deletion of $lacZ$ replaced with $P_{chb^-}$ -GFP transcriptional fusion linked to $Kan^R$ ; SBS in promoter element was moved 3 bp downstream; a deletion of CBP was replaced with $Spec^R$ | This Study (CAK 180 / SAD 1442) |

|                     |                                                                                        |                                                                                                                                                                                                                       |                                       |
|---------------------|----------------------------------------------------------------------------------------|-----------------------------------------------------------------------------------------------------------------------------------------------------------------------------------------------------------------------|---------------------------------------|
| +3 SBS              | $\Delta lacZ::P_{chb}\text{-GFP, Kan}^R; +3$<br>SBS                                    | A deletion of <i>lacZ</i> replaced with $P_{chb}\text{-GFP}$ transcriptional fusion linked to $\text{Kan}^R$ ; SBS in promoter element was moved 3 bp upstream                                                        | This Study<br>(CAK 183 /<br>SAD 1445) |
| +3 SBS $\Delta$ CBP | $\Delta lacZ::P_{chb}\text{-GFP, Kan}^R; +3$<br>SBS; $\Delta\text{CBP}::\text{Spec}^R$ | A deletion of <i>lacZ</i> replaced with $P_{chb}\text{-GFP}$ transcriptional fusion linked to $\text{Kan}^R$ ; SBS in promoter element was moved 3 bp upstream; a deletion of CBP was replaced with $\text{Spec}^R$   | This Study<br>(CAK 184 /<br>SAD 1446) |
| -5 SBS              | $\Delta lacZ::P_{chb}\text{-GFP, Kan}^R; -5$<br>SBS                                    | A deletion of <i>lacZ</i> replaced with $P_{chb}\text{-GFP}$ transcriptional fusion linked to $\text{Kan}^R$ ; SBS in promoter element was moved 5 bp downstream                                                      | This Study<br>(CAK 181 /<br>SAD 1443) |
| -5 SBS $\Delta$ CBP | $\Delta lacZ::P_{chb}\text{-GFP, Kan}^R; -5$<br>SBS; $\Delta\text{CBP}::\text{Spec}^R$ | A deletion of <i>lacZ</i> replaced with $P_{chb}\text{-GFP}$ transcriptional fusion linked to $\text{Kan}^R$ ; SBS in promoter element was moved 5 bp downstream; a deletion of CBP was replaced with $\text{Spec}^R$ | This Study<br>(CAK 182 /<br>SAD 1444) |
| +5 SBS              | $\Delta lacZ::P_{chb}\text{-GFP, Kan}^R; +5$<br>SBS                                    | A deletion of <i>lacZ</i> replaced with $P_{chb}\text{-GFP}$ transcriptional fusion linked to $\text{Kan}^R$ ; SBS in promoter element was moved 5 bp upstream                                                        | This Study<br>(CAK 185 /<br>SAD 1447) |
| +5 SBS $\Delta$ CBP | $\Delta lacZ::P_{chb}\text{-GFP, Kan}^R; +5$<br>SBS; $\Delta\text{CBP}::\text{Spec}^R$ | A deletion of <i>lacZ</i> replaced with $P_{chb}\text{-GFP}$ transcriptional fusion linked to $\text{Kan}^R$ ; SBS in promoter element was moved 5 bp upstream; a deletion of CBP was replaced with $\text{Spec}^R$   | This Study<br>(CAK 186 /<br>SAD 1448) |
| -8 SBS              | $\Delta lacZ::P_{chb}\text{-GFP, Kan}^R; -8$<br>SBS                                    | A deletion of <i>lacZ</i> replaced with $P_{chb}\text{-GFP}$ transcriptional fusion linked to $\text{Kan}^R$ ; SBS in promoter element was moved 8 bp downstream                                                      | This Study<br>(CAK 217 /<br>SAD 1463) |
| -8 SBS $\Delta$ CBP | $\Delta lacZ::P_{chb}\text{-GFP, Kan}^R; -8$<br>SBS; $\Delta\text{CBP}::\text{Spec}^R$ | A deletion of <i>lacZ</i> replaced with $P_{chb}\text{-GFP}$ transcriptional fusion linked to $\text{Kan}^R$ ; SBS in promoter element was moved 8 bp downstream; a deletion of CBP replaced with $\text{Spec}^R$     | This Study<br>(CAK 225 /<br>SAD 1471) |
| +8 SBS              | $\Delta lacZ::P_{chb}\text{-GFP, Kan}^R; +8$<br>SBS                                    | A deletion of <i>lacZ</i> replaced with $P_{chb}\text{-GFP}$ transcriptional fusion linked to $\text{Kan}^R$ ; SBS in promoter element was moved 8 bp upstream                                                        | This Study<br>(CAK 216 /<br>SAD 1462) |
| +8 SBS $\Delta$ CBP | $\Delta lacZ::P_{chb}\text{-GFP, Kan}^R; +8$<br>SBS; $\Delta\text{CBP}::\text{Spec}^R$ | A deletion of <i>lacZ</i> replaced with $P_{chb}\text{-GFP}$ transcriptional fusion linked to $\text{Kan}^R$ ; SBS in promoter element was moved 8 bp upstream; a deletion of CBP replaced with $\text{Spec}^R$       | This Study<br>(CAK 224 /<br>SAD 1470) |
| -9 SBS              | $\Delta lacZ::P_{chb}\text{-GFP, Kan}^R; -9$<br>SBS                                    | A deletion of <i>lacZ</i> replaced with $P_{chb}\text{-GFP}$ transcriptional fusion linked to $\text{Kan}^R$ ; SBS in promoter                                                                                        | This Study<br>(CAK 219 /<br>SAD 1465) |



|              |                                                                             |                                                                                                                                                                                                          |                                       |
|--------------|-----------------------------------------------------------------------------|----------------------------------------------------------------------------------------------------------------------------------------------------------------------------------------------------------|---------------------------------------|
|              |                                                                             | element was moved 9 bp downstream                                                                                                                                                                        |                                       |
| -9 SBS ΔCBP  | $\Delta lacZ::P_{chb}\text{-GFP, Kan}^R; -9$<br>SBS; $\Delta CBP::Spec^R$   | A deletion of <i>lacZ</i> replaced with $P_{chb}\text{-GFP}$ transcriptional fusion linked to $Kan^R$ ; SBS in promoter element was moved 9 bp downstream; a deletion of CBP replaced with $Spec^R$      | This Study<br>(CAK 227 /<br>SAD 1473) |
| +9 SBS       | $\Delta lacZ::P_{chb}\text{-GFP, Kan}^R; +9$<br>SBS                         | A deletion of <i>lacZ</i> replaced with $P_{chb}\text{-GFP}$ transcriptional fusion linked to $Kan^R$ ; SBS in promoter element was moved 9 bp upstream                                                  | This Study<br>(CAK 218 /<br>SAD 1464) |
| +9 SBS ΔCBP  | $\Delta lacZ::P_{chb}\text{-GFP, Kan}^R; +9$<br>SBS; $\Delta CBP::Spec^R$   | A deletion of <i>lacZ</i> replaced with $P_{chb}\text{-GFP}$ transcriptional fusion linked to $Kan^R$ ; SBS in promoter element was moved 9 bp upstream; a deletion of CBP replaced with $Spec^R$        | This Study<br>(CAK 226 /<br>SAD 1472) |
| -10 SBS      | $\Delta lacZ::P_{chb}\text{-GFP, Kan}^R; -$<br>10 SBS                       | A deletion of <i>lacZ</i> replaced with $P_{chb}\text{-GFP}$ transcriptional fusion linked to $Kan^R$ ; SBS in promoter element was moved 10 bp downstream                                               | This Study<br>(CAK 200 /<br>SAD 1456) |
| -10 SBS ΔCBP | $\Delta lacZ::P_{chb}\text{-GFP, Kan}^R; -$<br>10 SBS; $\Delta CBP::Spec^R$ | A deletion of <i>lacZ</i> replaced with $P_{chb}\text{-GFP}$ transcriptional fusion linked to $Kan^R$ ; SBS in promoter element was moved 10 bp downstream; a deletion of CBP was replaced with $Spec^R$ | This Study<br>(CAK 201 /<br>SAD 1457) |
| +10 SBS      | $\Delta lacZ::P_{chb}\text{-GFP, Kan}^R;$<br>+10 SBS                        | A deletion of <i>lacZ</i> replaced with $P_{chb}\text{-GFP}$ transcriptional fusion linked to $Kan^R$ ; SBS in promoter element was moved 10 bp upstream                                                 | This Study<br>(CAK 202 /<br>SAD 1458) |
| +10 SBS ΔCBP | $\Delta lacZ::P_{chb}\text{-GFP, Kan}^R;$<br>+10 SBS; $\Delta CBP::Spec^R$  | A deletion of <i>lacZ</i> replaced with $P_{chb}\text{-GFP}$ transcriptional fusion linked to $Kan^R$ ; SBS in promoter element was moved 10 bp upstream; a deletion of CBP was replaced with $Spec^R$   | This Study<br>(CAK 203 /<br>SAD 1459) |
| -11 SBS      | $\Delta lacZ::P_{chb}\text{-GFP, Kan}^R; -$<br>11 SBS                       | A deletion of <i>lacZ</i> replaced with $P_{chb}\text{-GFP}$ transcriptional fusion linked to $Kan^R$ ; SBS in promoter element was moved 11 bp downstream                                               | This Study<br>(CAK 221 /<br>SAD 1467) |
| -11 SBS ΔCBP | $\Delta lacZ::P_{chb}\text{-GFP, Kan}^R; -$<br>11 SBS; $\Delta CBP::Spec^R$ | A deletion of <i>lacZ</i> replaced with $P_{chb}\text{-GFP}$ transcriptional fusion linked to $Kan^R$ ; SBS in promoter element was moved 11 bp downstream; a deletion of CBP replaced with $Spec^R$     | This Study<br>(CAK 229 /<br>SAD 1475) |
| +11 SBS      | $\Delta lacZ::P_{chb}\text{-GFP, Kan}^R;$<br>+11 SBS                        | A deletion of <i>lacZ</i> replaced with $P_{chb}\text{-GFP}$ transcriptional fusion linked to $Kan^R$ ; SBS in promoter                                                                                  | This Study<br>(CAK 220 /<br>SAD 1466) |

|                                                                       |                                                                                                                                                                                  |                                                                                                                                                                                                                                               |                                 |
|-----------------------------------------------------------------------|----------------------------------------------------------------------------------------------------------------------------------------------------------------------------------|-----------------------------------------------------------------------------------------------------------------------------------------------------------------------------------------------------------------------------------------------|---------------------------------|
|                                                                       |                                                                                                                                                                                  | element was moved 11 bp upstream                                                                                                                                                                                                              |                                 |
| +11 SBS ΔCBP                                                          | $\Delta lacZ::P_{chb}\text{-GFP, Kan}^R$ ; +11 SBS; ΔCBP::Spec <sup>R</sup>                                                                                                      | A deletion of <i>lacZ</i> replaced with <i>P<sub>chb</sub></i> -GFP transcriptional fusion linked to Kan <sup>R</sup> ; SBS in promoter element was moved 11 bp upstream; a deletion of CBP replaced with Spec <sup>R</sup>                   | This Study (CAK 228 / SAD 1474) |
| -12 SBS                                                               | $\Delta lacZ::P_{chb}\text{-GFP, Kan}^R$ ; -12 SBS                                                                                                                               | A deletion of <i>lacZ</i> replaced with <i>P<sub>chb</sub></i> -GFP transcriptional fusion linked to Kan <sup>R</sup> ; SBS in promoter element was moved 12 bp downstream                                                                    | This Study (CAK 223 / SAD 1469) |
| -12 SBS ΔCBP                                                          | $\Delta lacZ::P_{chb}\text{-GFP, Kan}^R$ ; -12 SBS; ΔCBP::Spec <sup>R</sup>                                                                                                      | A deletion of <i>lacZ</i> replaced with <i>P<sub>chb</sub></i> -GFP transcriptional fusion linked to Kan <sup>R</sup> ; SBS in promoter element was moved 12 bp downstream; a deletion of CBP replaced with Spec <sup>R</sup>                 | This Study (CAK 231 / SAD 1477) |
| +12 SBS                                                               | $\Delta lacZ::P_{chb}\text{-GFP, Kan}^R$ ; +12 SBS                                                                                                                               | A deletion of <i>lacZ</i> replaced with <i>P<sub>chb</sub></i> -GFP transcriptional fusion linked to Kan <sup>R</sup> ; SBS in promoter element was moved 12 bp upstream                                                                      | This Study (CAK 222 / SAD 1468) |
| +12 SBS ΔCBP                                                          | $\Delta lacZ::P_{chb}\text{-GFP, Kan}^R$ ; +12 SBS; ΔCBP::Spec <sup>R</sup>                                                                                                      | A deletion of <i>lacZ</i> replaced with <i>P<sub>chb</sub></i> -GFP transcriptional fusion linked to Kan <sup>R</sup> ; SBS in promoter element was moved 12 bp upstream; a deletion of CBP replaced with Spec <sup>R</sup>                   | This Study (CAK 230 / SAD 1476) |
| $\Delta lacZ::P_{tac}\text{-slmA}$<br>T31A Δ <i>slmA</i>              | $\Delta lacZ::P_{tac}\text{-SlmA T31A}$<br>Spec <sup>R</sup> , Δ <i>slmA</i> ::Tm <sup>R</sup> ,<br>ΔVC1807::P <sub>chb</sub> - <i>gfp</i> Kan <sup>R</sup>                      | Overexpression construct for the indicated <i>SlmA</i> allele was integrated at the <i>lacZ</i> locus, while the <i>P<sub>chb</sub></i> reporter was integrated at the VC1807 locus, strain also has a deletion of <i>slmA</i>                | This study (SAD1239)            |
| $\Delta lacZ::P_{tac}\text{-slmA}$<br>T31A Δ <i>cbp</i> Δ <i>slmA</i> | $\Delta lacZ::P_{tac}\text{-SlmA T31A}$<br>Spec <sup>R</sup> , Δ <i>slmA</i> ::Tm <sup>R</sup> ,<br>Δ <i>cbp</i> ::Carb <sup>R</sup> ,<br>ΔVC1807::P <sub>chb</sub> - <i>gfp</i> | Overexpression construct for the indicated <i>SlmA</i> allele was integrated at the <i>lacZ</i> locus, while the <i>P<sub>chb</sub></i> reporter was integrated at the VC1807 locus, strain also has a deletion of <i>slmA</i> and <i>cbp</i> | This study (SAD1242)            |
| $\Delta lacZ::P_{tac}\text{-slmA}$<br>F63A Δ <i>slmA</i>              | $\Delta lacZ::P_{tac}\text{-SlmA F63A}$ ,<br>Δ <i>slmA</i> ::Tm <sup>R</sup> ,<br>ΔVC1807::P <sub>chb</sub> - <i>gfp</i>                                                         | Overexpression construct for the indicated <i>SlmA</i> allele was integrated at the <i>lacZ</i> locus, while the <i>P<sub>chb</sub></i> reporter was integrated at the VC1807 locus, strain also has a deletion of <i>slmA</i>                | This study (SAD1240)            |
| $\Delta lacZ::P_{tac}\text{-slmA}$<br>F63A Δ <i>cbp</i> Δ <i>slmA</i> | $\Delta lacZ::P_{tac}\text{-SlmA F63A}$ ,<br>Δ <i>slmA</i> ::Tm <sup>R</sup> , Δ <i>cbp</i> ::Carb <sup>R</sup> ,<br>ΔVC1807::P <sub>chb</sub> - <i>gfp</i>                      | Overexpression construct for the indicated <i>SlmA</i> allele was integrated at the <i>lacZ</i> locus, while the <i>P<sub>chb</sub></i> reporter was integrated at the VC1807 locus, strain also has a deletion of <i>slmA</i> and <i>cbp</i> | This study (SAD1243)            |

|                                                              |                                                                                                                   |                                                                                                                                                                                                                                     |                                       |
|--------------------------------------------------------------|-------------------------------------------------------------------------------------------------------------------|-------------------------------------------------------------------------------------------------------------------------------------------------------------------------------------------------------------------------------------|---------------------------------------|
| $\Delta lacZ::P_{tac}-slmA$<br>R71D $\Delta slmA$            | $\Delta lacZ::P_{tac}-SlmA$ R71D,<br>$\Delta slmA::Tm^R$ ,<br>$\Delta VC1807::P_{chb}-gfp$                        | Overexpression construct for the indicated SlmA allele was integrated at the lacZ locus, while the $P_{chb}$ reporter was integrated at the VC1807 locus, strain also has a deletion of <i>slmA</i>                                 | This study<br>(SAD1241)               |
| $\Delta lacZ::P_{tac}-slmA$<br>R71D $\Delta cbp \Delta slmA$ | $\Delta lacZ::P_{tac}-SlmA$ R71D,<br>$\Delta slmA::Tm^R$ , $\Delta cbp::Carb^R$ ,<br>$\Delta VC1807::P_{chb}-gfp$ | Overexpression construct for the indicated SlmA allele was integrated at the lacZ locus, while the $P_{chb}$ reporter was integrated at the VC1807 locus, strain also has a deletion of <i>slmA</i> and <i>cbp</i>                  | This study<br>(SAD1244)               |
| $P_{chb}$ 112 bp <i>lacZ</i><br>swap-gfp                     | $\Delta lacZ::P_{chb}-gfp$ 112 bp<br>swap Kan <sup>R</sup>                                                        | $\Delta lacZ::P_{chb}-gfp$ with nucleotides 612-724 swapped with an intergenic region from the <i>lacZ</i> gene linked to Kan <sup>R</sup>                                                                                          | This Study<br>(CAK 337 /<br>SAD 1482) |
| $P_{chb}$ 112 bp <i>lacZ</i><br>swap-gfp $\Delta cbp$        | $\Delta lacZ::P_{chb}-gfp$ 112 bp<br>swap Kan <sup>R</sup> , $\Delta CBP::Spec^R$                                 | $\Delta lacZ::P_{chb}-gfp$ with nucleotides 612-724 swapped with an intergenic region from the <i>lacZ</i> gene linked to Kan <sup>R</sup> ; deletion of CBP replaced with Spec <sup>R</sup>                                        | This Study<br>(CAK 338 /<br>SAD 1483) |
| $\Delta rpoS \Delta cbp$                                     | $P_{chb}-gfp$ , Kan <sup>R</sup> ;<br>$\Delta rpoS::Spec^R$ ; $\Delta cbp::Tm^R$                                  | A deletion of <i>lacZ</i> replaced with $P_{chb}$ -GFP transcriptional fusion linked to Kan <sup>R</sup> ; a deletion of <i>cbp</i> was replaced with Tm <sup>R</sup> and a deletion of <i>rpoS</i> replaced with Spec <sup>R</sup> | This Study<br>(CAH 432 /<br>SAD 1486) |
| $\Delta rpoN \Delta cbp$                                     | $P_{chb}-gfp$ , Kan <sup>R</sup> ;<br>$\Delta rpoN::Spec^R$ ; $\Delta cbp::Tm^R$                                  | A deletion of <i>lacZ</i> replaced with $P_{chb}$ -GFP transcriptional fusion linked to Kan <sup>R</sup> ; a deletion of <i>cbp</i> was replaced with Tm <sup>R</sup> and a deletion of <i>rpoN</i> replaced with Spec <sup>R</sup> | This Study<br>(CAH 433 /<br>SAD 1487) |
| $\Delta rpoF \Delta cbp$                                     | $P_{chb}-gfp$ , Kan <sup>R</sup> ;<br>$\Delta rpoF::Spec^R$ ; $\Delta cbp::Tm^R$                                  | A deletion of <i>lacZ</i> replaced with $P_{chb}$ -GFP transcriptional fusion linked to Kan <sup>R</sup> ; a deletion of <i>cbp</i> was replaced with Tm <sup>R</sup> and a deletion of <i>rpoF</i> replaced with Spec <sup>R</sup> | This Study<br>(CAH 434 /<br>SAD 1488) |
| $\Delta rpoH \Delta cbp$                                     | $P_{chb}-gfp$ , Kan <sup>R</sup> ;<br>$\Delta rpoH::Spec^R$ ; $\Delta cbp::Tm^R$                                  | A deletion of <i>lacZ</i> replaced with $P_{chb}$ -GFP transcriptional fusion linked to Kan <sup>R</sup> ; a deletion of <i>cbp</i> was replaced with Tm <sup>R</sup> and a deletion of <i>rpoH</i> replaced with Spec <sup>R</sup> | This Study<br>(CAH 435 /<br>SAD 1489) |
| $\Delta rpoE \Delta cbp$                                     | $P_{chb}-gfp$ , Kan <sup>R</sup> ;<br>$\Delta rpoE::Spec^R$ ; $\Delta cbp::Tm^R$                                  | A deletion of <i>lacZ</i> replaced with $P_{chb}$ -GFP transcriptional fusion linked to Kan <sup>R</sup> ; a deletion of <i>cbp</i> was replaced with Tm <sup>R</sup> and a deletion of <i>rpoE</i> replaced with Spec <sup>R</sup> | This Study<br>(CAH 436 /<br>SAD 1490) |
| Ec SBS Ec SlmA                                               | $\Delta lacZ::P_{chb}$ -GFP with Ec<br>SBS, Kan <sup>R</sup> ; Ec SlmA;<br>$\Delta VC1807::Spec^R$                | CAK 168 parent with the native copy of SlmA replaced with Ec SlmA; a deletion of VC1807 was replaced with Spec <sup>R</sup>                                                                                                         | This Study<br>(CAK 393 /<br>SAD1608)  |

|                                                            |                                                                                                                                                                                                       |                                                                                                                                                                                                                                                                                         |                                |
|------------------------------------------------------------|-------------------------------------------------------------------------------------------------------------------------------------------------------------------------------------------------------|-----------------------------------------------------------------------------------------------------------------------------------------------------------------------------------------------------------------------------------------------------------------------------------------|--------------------------------|
| Ec SBS Ec SlmA<br><i>Δcbp</i>                              | $\Delta lacZ::P_{chb}\text{-GFP}$ with Ec SBS, Kan <sup>R</sup> ; Ec SlmA; $\Delta CBP::Spec^R$ ;                                                                                                     | CAK 168 parent with the native copy of SlmA replaced with Ec SlmA; a deletion of <i>cbp</i> was replaced with Spec <sup>R</sup>                                                                                                                                                         | This Study (CAK 394 / SAD1609) |
| P <sub>tac</sub> -SlmA                                     | $\Delta lacZ::P_{chb}\text{-GFP}$ , Kan <sup>R</sup> ; $\Delta VC1807::P_{tac}\text{-SlmA-3x FLAG}$ , Spec <sup>R</sup>                                                                               | CAK 007 parent with a deletion of VC1807 replaced with a SlmA-3x FLAG fusion linked to the IPTG-inducible P <sub>tac</sub> promoter; P <sub>tag</sub> construct is linked to Spec <sup>R</sup>                                                                                          | This Study (CAK 371 / SAD1614) |
| P <sub>tac</sub> -SlmA $\Delta CBP$                        | $\Delta lacZ::P_{chb}\text{-GFP}$ , Kan <sup>R</sup> ; $\Delta VC1807::P_{tac}\text{-SlmA-3x FLAG}$ , Spec <sup>R</sup> ; $\Delta CBP::Tm^R$                                                          | CAK 007 parent with a deletion of VC1807 replaced with a SlmA-3x FLAG fusion linked to the IPTG-inducible P <sub>tac</sub> promoter; P <sub>tag</sub> construct is linked to Spec <sup>R</sup> ; a deletion of <i>cbp</i> was replaced with Tm <sup>R</sup>                             | This Study (CAK 372 / SAD1615) |
| P <sub>tac</sub> -SlmA F63A                                | $\Delta lacZ::P_{chb}\text{-GFP}$ , Kan <sup>R</sup> ; $\Delta VC1807::P_{tac}\text{-SlmA F63A-3x FLAG}$ , Spec <sup>R</sup>                                                                          | Native copy of SlmA WT replaced with SlmA F63A; deletion of VC1807 replaced with a SlmA-3x FLAG fusion linked to the IPTG-inducible P <sub>tac</sub> promoter; P <sub>tag</sub> construct is linked to Spec <sup>R</sup>                                                                | This Study (CAK 417 / SAD1616) |
| P <sub>tac</sub> -SlmA F63A $\Delta CBP$                   | $\Delta lacZ::P_{chb}\text{-GFP}$ , Kan <sup>R</sup> ; $\Delta VC1807::P_{tac}\text{-SlmA F63A-3x FLAG}$ , Spec <sup>R</sup> ; $\Delta CBP::Carb^R$                                                   | Native copy of SlmA WT replaced with SlmA F63A; deletion of VC1807 replaced with a SlmA-3x FLAG fusion linked to the IPTG-inducible P <sub>tac</sub> promoter; P <sub>tag</sub> construct is linked to Spec <sup>R</sup> ; a deletion of <i>cbp</i> was replaced with Carb <sup>R</sup> | This Study (CAK 418 / SAD1617) |
| P <sub>tac</sub> -ChiS                                     | $\Delta lacZ::P_{chb}\text{-GFP}$ , Kan <sup>R</sup> ; $\Delta VCA0692::Ptac\text{-ChiS}$ , Tm <sup>R</sup>                                                                                           | CAK 007 parent with a deletion of VCA0692 replaced with ChiS linked to the IPTG-inducible P <sub>tac</sub> promoter; P <sub>tac</sub> construct is linked to Tm <sup>R</sup>                                                                                                            | This Study (CAK 409 / SAD1619) |
| P <sub>tac</sub> -ChiS $\Delta CBP$                        | $\Delta lacZ::P_{chb}\text{-GFP}$ , Kan <sup>R</sup> ; $\Delta VCA0692::Ptac\text{-ChiS}$ , Tm <sup>R</sup> ; $\Delta CBP::Carb^R$                                                                    | CAK 007 parent with a deletion of VCA0692 replaced with ChiS linked to the IPTG-inducible P <sub>tac</sub> promoter; P <sub>tac</sub> construct is linked to Tm <sup>R</sup> ; a deletion of <i>cbp</i> was replaced with Carb <sup>R</sup>                                             | This Study (CAK 410 / SAD1620) |
| P <sub>tac</sub> -SlmA P <sub>tac</sub> -ChiS              | $\Delta lacZ::P_{chb}\text{-GFP}$ , Kan <sup>R</sup> ; $\Delta VC1807::P_{tac}\text{-SlmA-3x FLAG}$ , Spec <sup>R</sup> ; $\Delta VCA0692::Ptac\text{-ChiS}$ , Tm <sup>R</sup>                        | CAK 371 parent with a deletion of VCA0692 replaced with ChiS linked to the IPTG-inducible P <sub>tac</sub> promoter; P <sub>tac</sub> -ChiS construct is linked to Tm <sup>R</sup>                                                                                                      | This Study (CAK 415 / SAD1621) |
| P <sub>tac</sub> -SlmA P <sub>tac</sub> -ChiS $\Delta CBP$ | $\Delta lacZ::P_{chb}\text{-GFP}$ , Kan <sup>R</sup> ; $\Delta VC1807::P_{tac}\text{-SlmA-3x FLAG}$ , Spec <sup>R</sup> ; $\Delta VCA0692::Ptac\text{-ChiS}$ , Tm <sup>R</sup> ; $\Delta CBP::Carb^R$ | CAK 371 parent with a deletion of VCA0692 replaced with ChiS linked to the IPTG-inducible P <sub>tac</sub> promoter; P <sub>tac</sub> -ChiS construct is linked to Tm <sup>R</sup> ; a deletion of <i>cbp</i> was replaced with Carb <sup>R</sup>                                       | This Study (CAK 416 / SAD1622) |
| P <sub>tac</sub> -SlmA F63A P <sub>tac</sub> -ChiS         | $\Delta lacZ::P_{chb}\text{-GFP}$ , Kan <sup>R</sup> ; $\Delta VC1807::P_{tac}\text{-SlmA F63A-3x FLAG}$ , Spec <sup>R</sup> ;                                                                        | CAK 417 parent with a deletion of VCA0692 replaced with ChiS linked to the IPTG-inducible P <sub>tac</sub>                                                                                                                                                                              | This Study (CAK 419 / SAD1623) |

|                                                                    |                                                                                                                                                                                                                               |                                                                                                                                                                                                                                                   |                                       |
|--------------------------------------------------------------------|-------------------------------------------------------------------------------------------------------------------------------------------------------------------------------------------------------------------------------|---------------------------------------------------------------------------------------------------------------------------------------------------------------------------------------------------------------------------------------------------|---------------------------------------|
|                                                                    | $\Delta$ VCA0692::Ptac-ChiS, Tm <sup>R</sup>                                                                                                                                                                                  | promoter; P <sub>tac</sub> -ChiS construct is linked to Tm <sup>R</sup>                                                                                                                                                                           |                                       |
| P <sub>tac</sub> -SlmA F63A<br>P <sub>tac</sub> -ChiS $\Delta$ CBP | $\Delta$ lacZ::P <sub>chb</sub> -GFP, Kan <sup>R</sup> ;<br>$\Delta$ VC1807::P <sub>tac</sub> -SlmA<br>F63A-3x FLAG, Spec <sup>R</sup> ;<br>$\Delta$ VCA0692::Ptac-ChiS,<br>Tm <sup>R</sup> ; $\Delta$ CBP::Carb <sup>R</sup> | CAK 417 parent with a deletion of VCA0692 replaced with ChiS linked to the IPTG-inducible P <sub>tac</sub> promoter; P <sub>tac</sub> -ChiS construct is linked to Tm <sup>R</sup> ; a deletion of <i>cbp</i> was replaced with Carb <sup>R</sup> | This Study<br>(CAK 420 /<br>SAD1624)  |
| <b>Strains Used for Ec SBS-GFP Repression Reporter Assays</b>      |                                                                                                                                                                                                                               |                                                                                                                                                                                                                                                   |                                       |
| WT SlmA                                                            | $\Delta$ VC1807::Ec SBS-GFP,<br>Spec <sup>R</sup>                                                                                                                                                                             | A deletion of VC1807 replaced with consensus sequence of <i>E. coli</i> SlmA Binding Sites flanked by -10 and -35 RNA polymerase binding sites fused to GFP and linked to Spec <sup>R</sup>                                                       | This Study<br>(CAK 135 /<br>SAD 1427) |
| $\Delta$ SlmA                                                      | $\Delta$ VC1807::Ec SBS-GFP,<br>Spec <sup>R</sup> ; $\Delta$ <i>slmA</i> ::Tm <sup>R</sup>                                                                                                                                    | CAK 135 parent with a deletion of <i>slmA</i> replaced with Tm <sup>R</sup>                                                                                                                                                                       | This Study<br>(CAK 136 /<br>SAD 1428) |
| SlmA T31A                                                          | $\Delta$ VC1807::Ec SBS-GFP,<br>Spec <sup>R</sup> ; SlmA T31A; $\Delta$ lacZ<br>LPQEN::Kan <sup>R</sup>                                                                                                                       | CAK 136 parent with native <i>slmA</i> replaced with <i>slmA</i> T31A; <i>lacZ</i> linked to Kan <sup>R</sup>                                                                                                                                     | This Study<br>(CAK 195 /<br>SAD 1454) |
| SlmA E43A                                                          | $\Delta$ VC1807::Ec SBS-GFP,<br>Spec <sup>R</sup> ; SlmA E43A; $\Delta$ lacZ<br>LPQEN::Kan <sup>R</sup>                                                                                                                       | CAK 136 parent with native <i>slmA</i> replaced with <i>slmA</i> E43A; <i>lacZ</i> linked to Kan <sup>R</sup>                                                                                                                                     | This Study<br>(CAK 244 /<br>SAD 1478) |
| SlmA E43K                                                          | $\Delta$ VC1807::Ec SBS-GFP,<br>Spec <sup>R</sup> ; SlmA E43K; $\Delta$ lacZ<br>LPQEN::Kan <sup>R</sup>                                                                                                                       | CAK 136 parent with native <i>slmA</i> replaced with <i>slmA</i> E43K; <i>lacZ</i> linked to Kan <sup>R</sup>                                                                                                                                     | This Study<br>(CAK 212 /<br>SAD 1461) |
| SlmA F63A                                                          | $\Delta$ VC1807::Ec SBS-GFP,<br>Spec <sup>R</sup> ; SlmA F63A; $\Delta$ lacZ<br>LPQEN::Kan <sup>R</sup>                                                                                                                       | CAK 136 parent with native <i>slmA</i> replaced with <i>slmA</i> F63A; <i>lacZ</i> linked to Kan <sup>R</sup>                                                                                                                                     | This Study<br>(CAK 187 /<br>SAD 1449) |
| SlmA R71D                                                          | $\Delta$ VC1807::Ec SBS-GFP,<br>Spec <sup>R</sup> ; SlmA R71D; $\Delta$ lacZ<br>LPQEN::Kan <sup>R</sup>                                                                                                                       | CAK 136 parent with native <i>slmA</i> replaced with <i>slmA</i> R71D; <i>lacZ</i> linked to Kan <sup>R</sup>                                                                                                                                     | This Study<br>(CAK 188 /<br>SAD 1450) |
| SlmA R173E                                                         | $\Delta$ VC1807::Ec SBS-GFP,<br>Spec <sup>R</sup> ; SlmA R173E;<br>$\Delta$ lacZ LPQEN::Kan <sup>R</sup>                                                                                                                      | CAK 136 parent with native <i>slmA</i> replaced with <i>slmA</i> R173E; <i>lacZ</i> linked to Kan <sup>R</sup>                                                                                                                                    | This Study<br>(CAK 189 /<br>SAD 1451) |
| <b>Strains Used for Microscopy</b>                                 |                                                                                                                                                                                                                               |                                                                                                                                                                                                                                                   |                                       |
| WT SlmA                                                            | $\Delta$ lacZ::P <sub>tac</sub> -SlmA, Spec <sup>R</sup>                                                                                                                                                                      | <i>lacZ</i> replaced with SlmA WT under the control of an IPTG inducible P <sub>tac</sub> promoter (derived from a Spec <sup>R</sup> Tn10 fragment containing LacI, Spec <sup>R</sup> , and an outward reading P <sub>tac</sub> promoter)         | This Study<br>(CAK 137 /<br>SAD 1429) |
| SlmA T31A                                                          | $\Delta$ lacZ::P <sub>tac</sub> -SlmA, Spec <sup>R</sup>                                                                                                                                                                      | <i>lacZ</i> replaced with SlmA T31A under the control of an IPTG inducible P <sub>tac</sub> promoter (derived from a Spec <sup>R</sup> Tn10 fragment containing LacI, Spec <sup>R</sup> , and an outward reading P <sub>tac</sub> promoter)       | This Study<br>(CAK 151 /<br>SAD 1432) |
| SlmA E43A                                                          | $\Delta$ lacZ::P <sub>tac</sub> -SlmA, Spec <sup>R</sup>                                                                                                                                                                      | <i>lacZ</i> replaced with SlmA E43A under the control of an IPTG inducible P <sub>tac</sub> promoter (derived from a Spec <sup>R</sup> Tn10 fragment containing LacI, Spec <sup>R</sup> , and an outward reading P <sub>tac</sub> promoter)       | This Study<br>(CAK 152 /<br>SAD 1433) |

|                                                              |                                                                                         |                                                                                                                                                                                                                                                      |                                 |
|--------------------------------------------------------------|-----------------------------------------------------------------------------------------|------------------------------------------------------------------------------------------------------------------------------------------------------------------------------------------------------------------------------------------------------|---------------------------------|
| SlmA E43K                                                    | $\Delta lacZ::P_{tac}$ -SlmA, Spec <sup>R</sup>                                         | <i>lacZ</i> replaced with SlmA E43K under the control of an IPTG inducible P <sub>tac</sub> promoter (derived from a Spec <sup>R</sup> Tn10 fragment containing <i>lacI</i> , Spec <sup>R</sup> , and an outward reading P <sub>tac</sub> promoter)  | This Study (CAK 341 / SAD 1484) |
| SlmA F63A                                                    | $\Delta lacZ::P_{tac}$ -SlmA, Spec <sup>R</sup>                                         | <i>lacZ</i> replaced with SlmA F63A under the control of an IPTG inducible P <sub>tac</sub> promoter (derived from a Spec <sup>R</sup> Tn10 fragment containing <i>lacI</i> , Spec <sup>R</sup> , and an outward reading P <sub>tac</sub> promoter)  | This Study (CAK 153 / SAD 1434) |
| SlmA R71D                                                    | $\Delta lacZ::P_{tac}$ -SlmA, Spec <sup>R</sup>                                         | <i>lacZ</i> replaced with SlmA R71D under the control of an IPTG inducible P <sub>tac</sub> promoter (derived from a Spec <sup>R</sup> Tn10 fragment containing <i>lacI</i> , Spec <sup>R</sup> , and an outward reading P <sub>tac</sub> promoter)  | This Study (CAK 154 / SAD 1435) |
| SlmA R173E                                                   | $\Delta lacZ::P_{tac}$ -SlmA, Spec <sup>R</sup>                                         | <i>lacZ</i> replaced with SlmA R173E under the control of an IPTG inducible P <sub>tac</sub> promoter (derived from a Spec <sup>R</sup> Tn10 fragment containing <i>lacI</i> , Spec <sup>R</sup> , and an outward reading P <sub>tac</sub> promoter) | This Study (CAK 342 / SAD 1485) |
| <b>Strains Used for SlmA Overexpression and Purification</b> |                                                                                         |                                                                                                                                                                                                                                                      |                                 |
|                                                              | E. coli BL21-DE3 harboring pHisTev w / WT SlmA                                          | WT SlmA overexpression strain – SlmA cloned into <i>NdeI</i> / <i>BamHI</i> sites                                                                                                                                                                    | This Study (CAK 110 / SAD 1414) |
|                                                              | E. coli BL21-DE3 harboring pHisTev + SlmA T31A                                          | SlmA T31A overexpression strain – vector generated using single primer site directed mutagenesis                                                                                                                                                     | This Study (CAK 161 / SAD 1436) |
|                                                              | E. coli BL21-DE3 harboring pHisTev + SlmA E43A                                          | SlmA E43A overexpression strain – vector generated using single primer site directed mutagenesis                                                                                                                                                     | This Study (CAK 162 / SAD 1437) |
|                                                              | E. coli BL21-DE3 harboring pHisTev + SlmA E43K                                          | SlmA E43K overexpression strain – vector generated using single primer site directed mutagenesis                                                                                                                                                     | This study (CAK 268 / SAD 1479) |
| <b>Strains Used for FLAG Western Blots</b>                   |                                                                                         |                                                                                                                                                                                                                                                      |                                 |
| SlmA WT-3x FLAG                                              | $\Delta lacZ::P_{chb}$ -GFP, Kan <sup>R</sup> ; SlmA WT-3x FLAG; $\Delta CBP::Spec^R$   | CAK 024 parent with SlmA WT-3x FLAG knocked back in at native locus; deletion of <i>cbp</i> replaced with Spec <sup>R</sup>                                                                                                                          | This study (CAK 426 / SAD 1601) |
| SlmA T31A-3x FLAG                                            | $\Delta lacZ::P_{chb}$ -GFP, Kan <sup>R</sup> ; SlmA T31A-3x FLAG; $\Delta CBP::Spec^R$ | CAK 024 parent with SlmA T31A-3x FLAG knocked back in at native locus; deletion of <i>cbp</i> replaced with Spec <sup>R</sup>                                                                                                                        | This study (CAK 380 / SAD 1602) |
| SlmA E43A-3x FLAG                                            | $\Delta lacZ::P_{chb}$ -GFP, Kan <sup>R</sup> ; SlmA E43A-3x FLAG; $\Delta CBP::Spec^R$ | CAK 024 parent with SlmA E43A-3x FLAG knocked back in at native locus; deletion of <i>cbp</i> replaced with Spec <sup>R</sup>                                                                                                                        | This study (CAK 382 / SAD 1603) |
| SlmA E43K-3x FLAG                                            | $\Delta lacZ::P_{chb}$ -GFP, Kan <sup>R</sup> ; SlmA E43K-3x FLAG; $\Delta CBP::Spec^R$ | CAK 024 parent with SlmA E43K-3x FLAG knocked back in at native locus; deletion of <i>cbp</i> replaced with Spec <sup>R</sup>                                                                                                                        | This study (CAK 384 / SAD 1604) |

|                                        |                                                                                                                                                     |                                                                                                                                                                                                                                                                                   |                                 |
|----------------------------------------|-----------------------------------------------------------------------------------------------------------------------------------------------------|-----------------------------------------------------------------------------------------------------------------------------------------------------------------------------------------------------------------------------------------------------------------------------------|---------------------------------|
| SlmA F63A-3x FLAG                      | $\Delta lacZ::P_{chb}\text{-GFP, Kan}^R$ ;<br>SlmA F63A-3x FLAG;<br>$\Delta CBP::Spec^R$                                                            | CAK 024 parent with SlmA F63A-3x FLAG knocked back in at native locus; deletion of <i>cbp</i> replaced with $Spec^R$                                                                                                                                                              | This study (CAK 386 / SAD 1605) |
| SlmA R71D-3x FLAG                      | $\Delta lacZ::P_{chb}\text{-GFP, Kan}^R$ ;<br>SlmA R71D-3x FLAG;<br>$\Delta CBP::Spec^R$                                                            | CAK 024 parent with SlmA R71D-3x FLAG knocked back in at native locus; deletion of <i>cbp</i> replaced with $Spec^R$                                                                                                                                                              | This study (CAK 388 / SAD 1606) |
| SlmA R173E-3x FLAG                     | $\Delta lacZ::P_{chb}\text{-GFP, Kan}^R$ ;<br>SlmA R173E-3x FLAG;<br>$\Delta CBP::Spec^R$                                                           | CAK 024 parent with SlmA R173E-3x FLAG knocked back in at native locus; deletion of <i>cbp</i> replaced with $Spec^R$                                                                                                                                                             | This study (CAK 390 / SAD 1607) |
| Ptac-ChiS-FLAG                         | $\Delta lacZ::P_{chb}\text{-GFP, Kan}^R$ ;<br>$\Delta VCA0692::Ptac\text{-ChiS-1x FLAG, Tm}^R$ ;<br>$\Delta ChiS::Spec^R$ ;<br>$\Delta CBP::Carb^R$ | CAK 007 parent with a deletion of VCA0692 replaced with a ChiS-1x FLAG fusion linked to the IPTG-inducible $P_{tac}$ promoter; $P_{tac}$ -ChiS construct is linked to $Tm^R$ ; deletion of <i>chiS</i> replaced with $Spec^R$ and a deletion of <i>cbp</i> replaced with $Carb^R$ | This study (CAK 406 / SAD 1618) |
| ChiS-FLAG                              | $\Delta lacZ::P_{chb}\text{-GFP, Kan}^R$ ;<br>$\Delta ChiS::ChiS\text{-1x FLAG}$ ;<br>$\Delta CBP::Tm^R$                                            | CAK 007 parent with native ChiS replaced with a ChiS-1x FLAG fusion; deletion of CBP replaced with $Tm^R$                                                                                                                                                                         | This study (CAK 374 / SAD 1625) |
| <b>Strains Used for mCherry assays</b> |                                                                                                                                                     |                                                                                                                                                                                                                                                                                   |                                 |
| WT                                     | $\Delta lacZ::P_{chb}\text{-mCherry, Kan}^R$                                                                                                        | A deletion of <i>lacZ</i> replaced with $P_{chb}\text{-mCherry}$ transcriptional fusion linked to $Kan^R$                                                                                                                                                                         | This study (CAK 346 / SAD 1610) |
| $\Delta cbp$                           | $\Delta lacZ::P_{chb}\text{-mCherry, Kan}^R$ ;<br>$\Delta CBP::Spec^R$                                                                              | CAK 346 parent with a deletion of <i>cbp</i> replaced with $Spec^R$                                                                                                                                                                                                               | This study (CAK 347 / SAD 1611) |
| SlmA-3x FLAG                           | $\Delta lacZ::P_{chb}\text{-mCherry, Kan}^R$ ;<br>$\Delta SlmA::SlmA\text{-3x FLAG}$ ;<br>$\Delta VC1807::Spec^R$                                   | CAK 346 parent with the native copy of SlmA replaced with SlmA-3x FLAG; deletion of VC1807 replaced with $Spec^R$                                                                                                                                                                 | This study (CAK 358 / SAD 1612) |
| SlmA-3x FLAG<br>$\Delta cbp$           | $\Delta lacZ::P_{chb}\text{-mCherry, Kan}^R$ ;<br>$\Delta SlmA::SlmA\text{-3x FLAG}$ ;<br>$\Delta CBP::Spec^R$                                      | A deletion of <i>lacZ</i> replaced with $P_{chb}\text{-mCherry}$ transcriptional fusion linked to $Kan^R$ ; native copy of SlmA replaced with SlmA-3x FLAG; deletion of CBP replaced with $Spec^R$                                                                                | This study (CAK 359 / SAD 1613) |

**Table S2 – Primers used in this study**

| Primer Name                      | Primer Sequence (5'→3')                      | Description      |
|----------------------------------|----------------------------------------------|------------------|
| <b>Primers for SOE Deletions</b> |                                              |                  |
| ABD 796                          | TTAGAATCTGCGCCAGAAGCG                        | $\Delta CBP$ F1  |
| ABD 797                          | gtcgacggatccccggaatCATAGCTGTTCCCTTACTAGTTGC  | $\Delta CBP$ R1  |
| ABD 798                          | gaagcagctccagcctacaGTA CTGGATCTGAAACCAGTTAAG | $\Delta CBP$ F2  |
| ABD 799                          | GTATTGCGGAATGACCAGCATG                       | $\Delta CBP$ R2  |
| CAH 009                          | TGATGTTTCATGCTCTGCACC                        | $\Delta SlmA$ F1 |
| CAH 010                          | gtcgacggatccccggaatCATGCCCCGTTTTTCCTTTTG     | $\Delta SlmA$ R1 |
| CAH 011                          | gaagcagctccagcctacaATTAAGTGAGTACAATGAGTCAAG  | $\Delta SlmA$ F2 |

|                               |                                                            |                                                                                            |
|-------------------------------|------------------------------------------------------------|--------------------------------------------------------------------------------------------|
| CAH 012                       | GAAGGCATCGTTGTTAGATTGA                                     | $\Delta$ SlmA R2                                                                           |
| ABD 767                       | TTAATTTGGATCCCTGCGACACTC                                   | $\Delta$ ChiS F1                                                                           |
| ABD 768                       | gtcgacggatccccggaatCAAAAAACGTGAGGAGAATGCC                  | $\Delta$ ChiS R1                                                                           |
| ABD 769                       | gaagcagctccagcctacaTTCTTGAGCATTGCAAAGAAGC                  | $\Delta$ ChiS F2                                                                           |
| ABD 770                       | CTGGAACGAATGAAGAAGTCCAG                                    | $\Delta$ ChiS R2                                                                           |
| ABD 927                       | GCAGAGAAAGGGTATCATTACTGG                                   | $\Delta$ VC0995 F1                                                                         |
| ABD 928                       | GcTAATTCAGTTTAAGCGGCCATCTTAAGTCCCCCTATAG<br>GATTTTTG       | $\Delta$ VC0995 R1                                                                         |
| ABD 929                       | ATGGCCGCTTAAACTGAATTAgCACATCAGGTGCTTTAGGC<br>CAATTTG       | $\Delta$ VC0995 F2                                                                         |
| ABD 930                       | TACTCTCGTTTTTCGGCTTACTC                                    | $\Delta$ VC0995 R2                                                                         |
| BBC 081                       | AAGCAAGTTCACGTTTGCCG                                       | $\Delta$ VC0618-19 F1                                                                      |
| BBC 082                       | gtcgacggatccccggaatCATAACTTACACCTTACTCACCCAG               | $\Delta$ VC0618-19 R1                                                                      |
| BBC 083                       | gaagcagctccagcctacaGGAGATAAATAATCATGACTACGCC               | $\Delta$ VC0618-19 F2                                                                      |
| BBC 084                       | TAAAGTTCGCAACACGCC                                         | $\Delta$ VC0618-19 R2                                                                      |
| BBC 285                       | TCACTCTGCGTTTCTCATTTG                                      | $\Delta$ rpoS F1                                                                           |
| BBC 286                       | gtcgacggatccccggaatCATAGCGGCCTCCCCCTGG                     | $\Delta$ rpoS R1                                                                           |
| BBC 287                       | gaagcagctccagcctacaTAATTTTCCAGACTCATCCAAAAC                | $\Delta$ rpoS F2                                                                           |
| BBC 288                       | AAAACCCAGACATTCTGCTG                                       | $\Delta$ rpoS R2                                                                           |
| CAH 050                       | CTCTAATTCGGGAGAATCATCAG                                    | $\Delta$ rpoN F1                                                                           |
| CAH 051                       | gtcgacggatccccggaatCATGCAGTAATGGATGCCTTG                   | $\Delta$ rpoN R1                                                                           |
| CAH 052                       | gaagcagctccagcctacaCTATAGGCCTAAACTAGAGAAGG                 | $\Delta$ rpoN F2                                                                           |
| CAH 053                       | GAGAGTCGCTTCAAACATGTTC                                     | $\Delta$ rpoN R2                                                                           |
| CAH 095                       | CTGCACGTATTGTTGAACAAGAG                                    | $\Delta$ rpoF F1                                                                           |
| CAH 096                       | gtcgacggatccccggaatCATTCAATTCCTCATCATTCTCTG                | $\Delta$ rpoF R1                                                                           |
| CAH 097                       | gaagcagctccagcctacaTGATTTACATTGCGTAACAGC                   | $\Delta$ rpoF F2                                                                           |
| CAH 098                       | GATCAGGAGCAGTACTATGAC                                      | $\Delta$ rpoF R2                                                                           |
| CAH 100                       | CGATATTCGCACCATAGTGC                                       | $\Delta$ rpoH F1                                                                           |
| CAH 101                       | gtcgacggatccccggaatGTATTGATCGTATGTAAGCGC                   | $\Delta$ rpoH R1                                                                           |
| CAH 102                       | gaagcagctccagcctacaCGGAATGACTAAATATCACTGATC                | $\Delta$ rpoH F2                                                                           |
| CAH 103                       | CCATGGTAGAGTCAATATCGATC                                    | $\Delta$ rpoH R2                                                                           |
| CAH 105                       | GAGATGCGTGAGCATCAGTTC                                      | $\Delta$ rpoE F1                                                                           |
| CAH 106                       | gtcgacggatccccggaatCATTTCGAGCGGTCACTCCTATTG                | $\Delta$ rpoE R1                                                                           |
| CAH 107                       | gaagcagctccagcctacaCTTCTGTAACGCAAATTCGG                    | $\Delta$ rpoE F2                                                                           |
| CAH 108                       | GAGCAACGCACAGCATCAATC                                      | $\Delta$ rpoE R2                                                                           |
| BBC 717                       | AAATAGATTTGGTGACTTTACCTCC                                  | $\Delta$ VC1807 F1                                                                         |
| ABD 340                       | gtcgacggatccccggaatACGTTTCATTAGTCACCTCTATTGTT<br>AACTTGTTT | $\Delta$ VC1807 R1                                                                         |
| ABD 341                       | gaagcagctccagcctacaTAGTCGAAAATAAAAAAAGAGGCTC<br>GCCTC      | $\Delta$ VC1807 F2                                                                         |
| BBC 718                       | CTTTACGCCTGATTGTCTACAC                                     | $\Delta$ VC1807 R2                                                                         |
| ABD 123                       | ATTCCGGGGATCCGTCGAC                                        | Kan <sup>R</sup> , Spec <sup>R</sup> , Amp <sup>R</sup> , or Tm <sup>R</sup><br>cassette F |
| ABD 124                       | TGTAGGCTGGAGCTGCTTC                                        | Kan <sup>R</sup> , Spec <sup>R</sup> , Amp <sup>R</sup> , or Tm <sup>R</sup><br>cassette R |
| <b>Primers for Colony PCR</b> |                                                            |                                                                                            |
| ABD 725                       | GAAGCAGCTCCAGCCTACA                                        | F oligo to detect all SOE<br>mutants                                                       |
| CAH 023                       | GGTGATTTCCAGATTGAGTGC                                      | $\Delta$ slmA detect R (401 bp)                                                            |
| BBC 085                       | AACTTCCAACCCTTTGG                                          | $\Delta$ VC0618-19 detect R (780 bp)                                                       |
| BBC 289                       | CAGCTGAGCTTAATTCCTG                                        | $\Delta$ rpoS detect R (225 bp)                                                            |



|                                                        |                                                                  |                                                |
|--------------------------------------------------------|------------------------------------------------------------------|------------------------------------------------|
| CAH 054                                                | GTCGAACCAATTTATCCACC                                             | <i>ΔrpoN</i> detect R (254 bp)                 |
| CAH 099                                                | CGCTAGAGTCAAACACTTAGAG                                           | <i>ΔrpoF</i> detect R (176 bp)                 |
| CAH 104                                                | CAGGTGCTTCAGTTCTTCGTC                                            | <i>ΔrpoH</i> detect R (240 bp)                 |
| CAH 109                                                | GCTTCCAGCAAGAGGAATGG                                             | <i>ΔrpoE</i> detect R (447 bp)                 |
| CKP 043                                                | TCACTTAATCTGTGCACTTAGCAG                                         | R oligo to detect all SlmA point mutants       |
| CKP 045                                                | GAAGGGGCTTCACGCATg                                               | SlmA T31A F (520 bp)                           |
| CKP 097                                                | AAGCAAGTTGGCGTGTCCac                                             | SlmA E43A F (487 bp)                           |
| CKP 119                                                | CGCTAAGCAAGTTGGCGTGTcTa                                          | SlmA E43K F (487 bp)                           |
| CKP 042                                                | TTTGAAGGCTTAATTGAGgcg                                            | SlmA F63A F (420 bp)                           |
| CKP 044                                                | GAAGAATCCTTGATGTCCgga                                            | SlmA R71D F (400 bp)                           |
| BBC 895                                                | TTGAATCGCTTTGTGgaa                                               | SlmA R173E F (90 bp)                           |
| ABD 769                                                | gaagcagctccagcctacaTTCTTGAGCATTGCAAAGAAGC                        | Scrambled SBS detect F                         |
| CKP 053                                                | GTTTAGCTAGGTTtaaTAGTGTTTctg                                      | 1 <sup>st</sup> conserved SBS site scrambled R |
| CKP 054                                                | GGTACGGTTTAGCTAGGTTtaa                                           | 2 <sup>nd</sup> conserved SBS site scrambled R |
| ABD 797                                                | gtcgacggatccccggaatCATAGCTGTTCCCTTACTAGTTGC                      | $\Delta$ SBS detect R                          |
| CKP 052                                                | AGCCATTATCAAACAAGTAGCTAAACCGTA                                   | $\Delta$ SBS detect F                          |
| <b>Primers for Transcriptional Reporter Constructs</b> |                                                                  |                                                |
| ABD332                                                 | GGCTGAACGTGGTTGTGCGAAAATGAC                                      | $\Delta$ lacZ F1 (Up Arm)                      |
| BBC219                                                 | GTTTATTTTTGTGCGACTGTACAGCGTTTAAATAGAGGTCCG<br>ATATTGACCC         | $\Delta$ lacZ R1 (Up Arm)                      |
| BBC218                                                 | CGCTGTACAGTCGACAAAAATAAAC                                        | Kan <sup>R</sup> F (Middle Arm)                |
| BBC262                                                 | TACCGAGGACGCGAAGCTG                                              | Kan <sup>R</sup> R (Middle Arm)                |
| BBC266                                                 | CAGCTTCGCGTCCCTCGGTAGAATAAAGCAATCCGCAAGCG                        | P <sub>chb</sub> F (Middle Arm)                |
| BBC267                                                 | CCCGGGATCCTGTGTGAAATTGAGTTGCTTTCATTTCACTA<br>ATGG                | P <sub>chb</sub> R (Middle Arm)                |
| BBC252                                                 | CAATTTACACAGGATCCCGGGAGGAGTAACGTAATGCG<br>TAAAGGAGAAGAAC         | GFP F (Middle Arm)                             |
| BBC254                                                 | tgtaggctggagctgcttctTAGTTGTATAGTTCATCCATGCC                      | GFP R (Middle Arm)                             |
| ABD255                                                 | gaagcagctccagcctacaCCACAATAAGCCAGAGAGCCTTAAG                     | $\Delta$ lacZ F2 (Down Arm)                    |
| ABD256                                                 | CCCAAATACGGCAACTTGGCG                                            | $\Delta$ lacZ R2 (Down Arm)                    |
| BBC817                                                 | ttgagtaagtgagcgcctcacttactataatgtgtggAATTGTGAGCGGAT<br>ACAATTTCA | Synthetic SBS-GFP DNA binding reporter F2      |
| BBC821                                                 | ccacacattatagtaagtgagcgcctcacttactcaaCTCATTAGGCACCC<br>CAGGC     | Synthetic SBS-GFP DNA binding reporter R1      |
| CKP210                                                 | TGACCATTTAGAGATGCTAGGTTTGTAGTGTTTACTTAC                          | P <sub>chb</sub> 612-724 lacZ swap R1          |
| CKP212                                                 | ACATTCCTGTACCGAACGGGAATTGCAATTGATAAATTTCT                        | P <sub>chb</sub> 612-724 lacZ swap F2          |
| CKP213                                                 | ACTAACAAACCTAGCATCTCTAAATGGTCAGTGGCG                             | 112 bp lacZ intergenic F                       |
| CKP215                                                 | AATTGCAATTCCTGTTCCGTACAGGAATGTGCGCCCAAG                          | 112 bp lacZ intergenic R                       |
| <b>Primers for SlmA Mutants</b>                        |                                                                  |                                                |
| CKP 040                                                | GAAGGGGCTTCACGCATcGcGACCGCAAAACTCGCTAAGCA<br>AG                  | SlmA T31A F2                                   |
| CKP 041                                                | GCGAGTTTTGCGGTcGcGATGCGTGAAGCCCTTCATTG                           | SlmA T31A R1                                   |
| CKP 095                                                | TGGCGTGTCCGcAGCCGCGCTGTATCGCCATTTCCCAGAC                         | SlmA E43A F2                                   |
| CKP 096                                                | TGGCGATACAGCGCGGTgCGGACACGCCAACTTGCTTAG                          | SlmA E43A R1                                   |
| CKP 117                                                | TGGCGTGTCCaAAGCCGCGCTGTATCGCCATTTCCCAGAC                         | SlmA E43K F2                                   |
| CKP 118                                                | TGGCGATACAGCGCGGTTtGGACACGCCAACTTGCTTAG                          | SlmA E43K R1                                   |
| CKP 036                                                | TGAAGGCTTAATTGAGgcgATTGAAGAATCCTTGATGTCCG                        | SlmA F63A F2                                   |
| CKP 037                                                | AGGATTCTTCAATcgcCTCAATTAAGCCTTCAAACATACG                         | SlmA F63A R1                                   |

|                                                  |                                                              |                                                                                            |
|--------------------------------------------------|--------------------------------------------------------------|--------------------------------------------------------------------------------------------|
| CKP 038                                          | GAATCCTTGATGTCGgaTATCAACCGCATCTTTGATGAAG                     | SlmA R71D F2                                                                               |
| CKP 039                                          | GATGCGGTTGATAtcCGACATCAAGGATTCTTCAAT                         | SlmA R71D R1                                                                               |
| BBC 894                                          | GGCAGTTTGAATCGCTTTGTGgaaTCTGATTTCAAATATCTGCC                 | SlmA R173E F2                                                                              |
| BBC 893                                          | GGCAGATATTTGAAATCAGAttcCACAAAGCGATTCAAACCTGCC                | SlmA R173E R1                                                                              |
| CAH0009                                          | TGATGTTTCATGCTCTGCACC                                        | Replace Vc <i>slmA</i> with Ec <i>slmA</i> F1                                              |
| BBC768                                           | GCCCCGTTTTTCCTTTTGG                                          | Replace Vc <i>slmA</i> with Ec <i>slmA</i> R1                                              |
| BBC770                                           | ccaaaaggaaaaacggggcATGGCAGAAAAACAACTGC                       | Replace Vc <i>slmA</i> with Ec <i>slmA</i> (middle) F                                      |
| BBC771                                           | gctgtattatcttgactcattgtacTTcAtTtGtAACTGTGCCGCAATTAAG         | Replace Vc <i>slmA</i> with Ec <i>slmA</i> (middle) R                                      |
| BBC769                                           | GTACAATGAGTCAAGATAAATACAGC                                   | Replace Vc <i>slmA</i> with Ec <i>slmA</i> F2                                              |
| CAH0012                                          | GAAGGCATCGTTGTTAGATTGA                                       | Replace Vc <i>slmA</i> with Ec <i>slmA</i> R2                                              |
| <b>Primers for P<sub>chb</sub> Modifications</b> |                                                              |                                                                                            |
| CKP 102                                          | gtaagtgagcgtcacttacCTAGCTAAACCGTACCCGTTTTG                   | P <sub>chb</sub> <i>E. coli</i> SBS F                                                      |
| CKP 101                                          | gtaagtgagcgtcacttacTTATTTGGCCTTGTGTTGATAATGG                 | P <sub>chb</sub> <i>E. coli</i> SBS R                                                      |
| CKP 049                                          | ATTATCAAACAAGGCCAAATAAGTAcagAAACACTAttaAACCTAGCTAAACCGTACCCG | P <sub>chb</sub> Scrambled SBS F                                                           |
| CKP 048                                          | GGGTACGGTTTAGCTAGGTTtaaTAGTGTTTctgTACTTATTGGCCTTGTGTTGATAATG | P <sub>chb</sub> Scrambled SBS R                                                           |
| BBC 266                                          | CAGCTTCGCGTCCCTCGGTAGAATAAAGCAATCCGCAAGCG                    | P <sub>chb</sub> P1 only and P1+P2 F                                                       |
| BBC 609                                          | cccgggatcctgtgtgaaattgCCTAGCGGCAATTCAAGTTGC                  | P <sub>chb</sub> P1 only R                                                                 |
| BBC 608                                          | cccgggatcctgtgtgaaattgCTGAGTTATATTTGCGAGATCTCGC              | P <sub>chb</sub> P1+P2 R                                                                   |
| BBC 606                                          | cagcttcgctcctcggtAGAGATTGCGAAGGGAGTCAC                       | P <sub>chb</sub> P2 only, P2+SBS, P2+SBS more space, P2+P3, P3 only more space, Δhairpin F |
| CKP 001                                          | cccgggatcctgtgtgaaattgCTTATTTGGCCTTGTGTTGATAATG              | P <sub>chb</sub> P2 only R                                                                 |
| CKP 071                                          | cccgggatcctgtgtgaaattgGTGATTCAACTCGCAAACGGG                  | P <sub>chb</sub> P2+SBS R                                                                  |
| CKP 072                                          | cccgggatcctgtgtgaaattgCTTTGGCAGGAGTAAGAAAACACCTAG            | P <sub>chb</sub> P2+SBS more space and P2+P3 internal region R                             |
| BBC 267                                          | CCCGGATCCTGTGTGAAATTGAGTTGCTTTTCATTTCACTAATGG                | P <sub>chb</sub> P2+P3 and P3 only R                                                       |
| CKP 073                                          | cagcttcgctcctcggtACAGGCTAGTGAGCGAGATCT                       | P <sub>chb</sub> P2+P3 internal region and P3 only more space F                            |
| BBC 607                                          | cagcttcgctcctcggtTACAGGCCACTCATGACTCC                        | P <sub>chb</sub> P3 only F                                                                 |
| CKP 084                                          | cccgggatcctgtgtgaaattgGACCTACCTCATCACTTTTACCC                | P <sub>chb</sub> Δhairpin R                                                                |
| CKP 106                                          | AACAAGGCCAAAGTAAGTAAACACTAACAAACtaaCTAGCTAAACCGTACCCG        | P <sub>chb</sub> -3 SBS F                                                                  |
| CKP 105                                          | ttagttgttagtgtttacttacTTTGGCCTTGTGTTGATAATGGC                | P <sub>chb</sub> -3 SBS R                                                                  |
| CKP 108                                          | GCCAAATAActaGTAAGTAAACACTAACAAACGCTAAACCGTACCCGTTTTG         | P <sub>chb</sub> +3 SBS F                                                                  |
| CKP 107                                          | AGCGTTTGTGTTAGTGTGTTACTTACTtagTTATTTGGCCTTGTGTTGATAATGG      | P <sub>chb</sub> +3 SBS R                                                                  |
| CKP 104                                          | GGCCAGTAAGTAAACACTAACAAACaataaCTAGCTAAACCGTACCCGTTTTG        | P <sub>chb</sub> -5 SBS F                                                                  |
| CKP 103                                          | GCTAGTtattGTTTGTAGTGTGTTACTTACTGGCCTTGTGTTGATAATGGC          | P <sub>chb</sub> -5 SBS R                                                                  |
| CKP 110                                          | GGCCAAATAActagcGTAAGTAAACACTAACAAACTAAACCGTACCCGTTTTGCG      | P <sub>chb</sub> +5 SBS F                                                                  |

|                                              |                                                                  |                                  |
|----------------------------------------------|------------------------------------------------------------------|----------------------------------|
| CKP 109                                      | GGTTTAGTTTGTAGTGTTTACTTACgctagTTATTTGGCCT<br>TGTTTGATAATGG       | P <sub>chb</sub> +5 SBS R        |
| CKP 136                                      | GTAAGTAAACACTAACAAACcceaataaCTAGCTAAACCGTA<br>CCCC               | P <sub>chb</sub> -8 SBS F        |
| CKP 135                                      | ttatttggGTTTGTAGTGTTTACTTACCCTTGTTTGATAATG<br>GCTCTTTGCC         | P <sub>chb</sub> -8 SBS R        |
| CKP 138                                      | ctagctaaGTAAGTAAACACTAACAAACACCGTACCCGTTTTG<br>CGAGTTGAATC       | P <sub>chb</sub> +8 SBS F        |
| CKP 137                                      | GTTTGTAGTGTTTACTTACctagctagTTATTTGGCCTTGTT<br>TGATAATGGC         | P <sub>chb</sub> +8 SBS R        |
| CKP 132                                      | GTAAGTAAACACTAACAAACgceaataaCTAGCTAAACCGT<br>ACCCG               | P <sub>chb</sub> -9 SBS F        |
| CKP 131                                      | ttatttggcGTTTGTAGTGTTTACTTACCCTTGTTTGATAATG<br>GCTCTTTGCC        | P <sub>chb</sub> -9 SBS R        |
| CKP 134                                      | ctagctaaaGTAAGTAAACACTAACAAACCGTACCCGTTTTG<br>CGAGTTGAATC        | P <sub>chb</sub> +9 SBS F        |
| CKP 133                                      | GTTTGTAGTGTTTACTTACcttagctagTTATTTGGCCTTGT<br>TTGATAATGGC        | P <sub>chb</sub> +9 SBS R        |
| BBC 968                                      | ATTATCAAACAAGTAAGTAAACACTAACAAACggceaataa<br>CTAGCTAAACCGTACCCG  | P <sub>chb</sub> -10 SBS F       |
| BBC 967                                      | TTAGCTAGttatttggccGTTTGTAGTGTTTACTTACTTGTTT<br>GATAATGGCTCTTTGC  | P <sub>chb</sub> -10 SBS R       |
| BBC 966                                      | GCCAAATAActagctaaacGTAAGTAAACACTAACAAACCGTA<br>CCCGTTTTGCGAGTTG  | P <sub>chb</sub> +10 SBS F       |
| BBC 965                                      | GGGTACGGTTTTGTAGTGTTTACTTACgtttagctagTTATTT<br>GGCCTTGTTTGATAATG | P <sub>chb</sub> +10 SBS R       |
| CKP 128                                      | GTAAGTAAACACTAACAAACcaggceaataaCTAGCTAAACCG<br>TACCCG            | P <sub>chb</sub> -11 SBS F       |
| CKP 127                                      | ttatttggcctGTTTGTAGTGTTTACTTACTGTTTGATAATGG<br>CTCTTTGCC         | P <sub>chb</sub> -11 SBS R       |
| CKP 130                                      | ctagctaaaccGTAAGTAAACACTAACAAACGTACCCGTTTTG<br>CGAGTTGAATC       | P <sub>chb</sub> +11 SBS F       |
| CKP 129                                      | GTTTGTAGTGTTTACTTACggttagctagTTATTTGGCCTTG<br>TTTGATAATGGC       | P <sub>chb</sub> +11 SBS R       |
| CKP 124                                      | GTAAGTAAACACTAACAAACaaggceaataaCTAGCTAAACC<br>GTACCCG            | P <sub>chb</sub> -12 SBS F       |
| CKP 123                                      | ttatttggccttGTTTGTAGTGTTTACTTACGTTTGATAATGGC<br>TCTTTGCC         | P <sub>chb</sub> -12 SBS R       |
| CKP 126                                      | ctagctaaaccgGTAAGTAAACACTAACAAACTACCCGTTTTGC<br>GAGTTGAATC       | P <sub>chb</sub> +12 SBS F       |
| CKP 125                                      | GTTTGTAGTGTTTACTTACcggtttagctagTTATTTGGCCTT<br>GTTTGATAATGGC     | P <sub>chb</sub> +12 SBS R       |
| <b>Primers for Overexpression Constructs</b> |                                                                  |                                  |
| BBC 772                                      | caatttcacacaggatcccgggAGGAGGTaacgtaATGGCCGGCAAT<br>AAAAAATC      | P <sub>tac</sub> -SlmA F         |
| BBC 773                                      | tgtaggctggagctgcttcTCACTTAATCTGTGCACTTAGC                        | P <sub>tac</sub> -SlmA R         |
| BBC 1236                                     | caatttcacacaggatcccgggAGGAGGTaacgtaATGTTTAGGTTT<br>TATCGAAAACAA  | P <sub>tac</sub> -ChiS F         |
| BBC 577                                      | tgtaggctggagctgcttcTTATTCCTGAGGAGTTTTTGC                         | P <sub>tac</sub> -ChiS R         |
| CKP 224                                      | tgtaggctggagctgcttcTTAttgtcatgcatcctataatc                       | P <sub>tac</sub> ChiS FLAG tag R |
| CKP 225                                      | tgtaggctggagctgcttcTCACTTttgtcatgcatc                            | P <sub>tac</sub> SlmA FLAG tag R |
| <b>Primers for Vector Cloning</b>            |                                                                  |                                  |
| CKP 046                                      | tatatatacatATGGCCGGCAATAAAAAAAT                                  | SlmA NdeI F                      |

|                                     |                                                                                    |                               |
|-------------------------------------|------------------------------------------------------------------------------------|-------------------------------|
| CKP 047                             | tatatataggatccTCACTTAATCTGTGCA                                                     | SlmA BamHI R                  |
| CKP 076                             | tatatagaattcaggaggtaacgtaATGGCCGGCAATAAAAAATC                                      | SlmA EcoRI F                  |
| <b>Primers for EMSA Probes</b>      |                                                                                    |                               |
| BBC 744                             | cagcttcgctcctcggttaCGCAAATATAACTCAGGCAAAG                                          | $P_{chb}$ SBS F               |
| CKP 072                             | cccgggatcctgtgtgaaattgCTTTGGCAGGAGTAAGAAAAACACC<br>TAG                             | $P_{chb}$ SBS R               |
| BBC 928                             | CAAATATATCCTCCTCACTATTTTG                                                          | Ec SBS Repression Reporter F  |
| BBC 929                             | AACATCACCATCTAATTCAACAAG                                                           | Ec SBS Repression Reporter R  |
| ABD 009                             | TATATGCCTTTAGGCATTAACTGTACTTCCGTC                                                  | $P_{nanH}$ F                  |
| ABD 010                             | TGAAGTCATCTTGATTGACAAGTCTCCATCGAATG                                                | $P_{nanH}$ R                  |
| <b>Primers for qRT PCR</b>          |                                                                                    |                               |
| BBC 989                             | GCATCTAGGTTTTGACGTTTTTAACG                                                         | Uninduced transcript F        |
| BBC 990                             | AACACTCTCCAAGACCTACCTC                                                             | Uninduced transcript R        |
| BBC 918                             | AGTAATCGCAGCAGCAACCAG                                                              | Induced transcript F          |
| BBC 919                             | GGTTCATAGATAAAGTCGGTGGTTG                                                          | Induced transcript R          |
| ABD 132                             | CTGTCTCAAGCCGGTTACAA                                                               | <i>rpoB</i> F                 |
| ABD 133                             | TTTCTACCAGTGCAGAGATGC                                                              | <i>rpoB</i> R                 |
| <b>Primers for 5' RACE</b>          |                                                                                    |                               |
| BBC969                              | GATTACGCCAAGCTTCTGGTAACCCACTTGTTGATACCAG                                           | GSP1 – for $P_{chb}$ 5' RACE  |
| BBC970                              | GATTACGCCAAGCTTAGCAGGCCGAAAGAGTAAACCAG                                             | NGSP1 – for $P_{chb}$ 5' RACE |
| <b>Primers for FLAG Tag Fusions</b> |                                                                                    |                               |
| CKP 220                             | ggtgactacaaggatcacgacattgattataaggatgacgatgacaaaAAGT<br>GAGTACAATGAGTCAAGATAAATACA | SlmA-3x FLAG F                |
| CKP 221                             | ataatcaatgctgtagccttgtagtcaccatcatggtctttataatcAATCTGT<br>GCACTTAGCAGCG            | SlmA-3x FLAG R                |
| CKP 237                             | GTGAAgattataaggatgacgatgacaaaTAAAGCAATCCGCAAGC<br>GAG                              | ChiS-1x FLAG F                |
| CKP 238                             | CTTTAtttgcatcgtcatccttataatcTTCAGTGGTCAGGAGTTTT<br>TG                              | ChiS-1x FLAG R                |
